# Supplementary material
Source: PubMed Central journal article supplement (PMC5679717)

## SUPPLEMENTAL MATERIAL

| <b>Table of Contents</b>                                                                                  | <b>Page</b> |
|-----------------------------------------------------------------------------------------------------------|-------------|
| Supplementary Table S1: Primer sequences for all experiments                                              | 2           |
| Supplementary Table S2: List of variants observed in targeted sequencing                                  | 4           |
| Supplementary Table S3: Potentially deleterious variants in <i>PRRX1</i>                                  | 57          |
| Supplementary Table S4: Regions tested for enhancer activity in zebrafish embryos                         | 58          |
| Supplementary Table S5: Prediction of altered transcription factor binding sites by JASPAR                | 59          |
| Supplementary Figure S1: Principal components analysis of previously genotyped study samples              | 61          |
| Supplementary Figure S2: <i>prrx1</i> knockdown morpholino efficacy and functional effects                | 62          |
| Supplementary Figure S3: DNaseI hypersensitivity in hESC, HCM and HCF around the enhancer regions E and F | 63          |
| Supplementary Figure S4: Hi-C derived directionality ratios and virtual 3C                                | 64          |
| Supplementary Figure S5: Screening for a functional SNP within <i>PRRX1</i> promoter region               | 66          |
| Supplementary Figure S6: Analysis of the effect of rs577676 on the enhancer function via serial deletions | 67          |

**Supplementary Table S1. Primer sequences**

| <b>Primers for zebrafish data</b>                 |                                                       |                                   |
|---------------------------------------------------|-------------------------------------------------------|-----------------------------------|
| <b>Primer name</b>                                | <b>Sequence (5' to 3')</b>                            |                                   |
| <i>prrx1a</i> E1I1 semi-qRT-PCR                   | GACTGGAGACTGCGATCACC<br>AGCATCGCACGTTTCATTTCG         |                                   |
| <i>prrx1b</i> E1I1 semi-qRT-PCR                   | GGTCGGTTCTCAGGTGGATG<br>CGCTTCCCAGGATAGGTAG           |                                   |
| <i>prrx1a</i> E3I3 semi-qRT-PCR                   | TTCAAAATCGACGGGCTAAG<br>GGGACATTGGGATTGTTCTG          |                                   |
| <i>ef-1α</i> semi-qRT-PCR                         | AAGAGAACCATCGAGAAGTTTCG<br>CTCAATCTTCCATCCCTTGAAC     |                                   |
| <i>eGFP</i> qRT-PCR                               | AAGTCGTGCTGCTTCATGTG<br>ACGTAAACGGCCACAAGTTC          |                                   |
| <i>ef-1α</i> qRT-PCR                              | TTGAGAAGAAAATCGGTGGTGCTG<br>GGAACGGTGTGATTGAGGGAAATTC |                                   |
| <i>Beta-actin</i> qRT-PCR                         | CGAGCAGGAGATGGGAACC<br>CAACGGAAACGCTCATTGC            |                                   |
| <b>Primers for chromatin conformation capture</b> |                                                       |                                   |
| <b>Primer name</b>                                | <b>distance (kb)</b>                                  | <b>Sequence (5' to 3')</b>        |
| anchor                                            |                                                       | AGTTGGTAAAACACAAAGTTCCAC          |
| probe                                             |                                                       | 6FAM-CATTGTGACGGCCCTCGGCAGG-TAMRA |
| self-loop                                         |                                                       | TTGAGTTCATCTTCAGGTTATACCA         |
| Pr-1                                              | -14.246                                               | TTGATGTGGATCGGCAGTCTT             |
| Pr-2                                              | -11.484                                               | TAGCTGGGACCATACGTTCCA             |
| Pr-3                                              | -6.426                                                | CATTTGCTCATCTCTAAGGATTTTATT       |
| Pr-4                                              | -4.825                                                | TCAAGCCTCAGTAATGATGGAC            |
| Pr-5                                              | -2.348                                                | CCCAACCATGAGGATTTGAAGAT           |
| Pr-6                                              | 1.265                                                 | CATTCCAGTGTGCATGGCAG              |
| Pr-7                                              | 5.557                                                 | CTACAAGGCTTCTTGTAGAAATG           |
| Pr-8                                              | 15.806                                                | GGAAGCAAACACAGATCAAAGTC           |
| Pr-9                                              | 18.165                                                | CAATTTGGTGATACCTATAAACTTTC        |
| Pr-10                                             | 26.681                                                | CAAGATTTAAGTTCCTATGGCATAAC        |
| Pr-11                                             | 30.22                                                 | CATTAGTAGGCATCCTTTTCTCATT         |
| Pr-12                                             | 33.169                                                | GGAAGCCACACTAATAGATGCAT           |
| Pr-13                                             | 37.417                                                | CATTTTTAAGCATCTAAGTTACATGC        |
| Pr-14                                             | 38.163                                                | CTGAGGCTTGGAGTGGTAAC              |
| Pr-15                                             | 49.675                                                | CAATTATCTCGTTGAAGAGGGGA           |
| Pr-16                                             | 63.71                                                 | CTAACTATGTAGAGAGCAGGGT            |
| Pr-17                                             | 65.798                                                | CATGCAGAGAAGTTTAGTACTTG           |
| Pr-18                                             | 87.599                                                | GTGACCACCTACACTTCATGG             |

|       |         |                                |
|-------|---------|--------------------------------|
| Pr-19 | 89.764  | GTGAGAAATAATAGATCAGCTGAG       |
| Pr-20 | 95.468  | TGCAGAGCAGAAGAGGGTGA           |
| Pr-21 | 99.068  | TGCAGAGCAGAAGAGGGTGA           |
| Pr-22 | 106.605 | TTGGGAGATGGGGAATTTTCTTAAA      |
| Pr-23 | 109.648 | TTTAGAACCAAACACTATGTTATGATTTCA |
| Pr-24 | 110.622 | GTGCCTTCTTTACATCCGTGG          |
| Pr-25 | 111.813 | GAAAGATCACTGAACATACAGTAC       |
| Pr-26 | 116.277 | CAGTGGCTTAGTAACCTCTTGAT        |
| Pr-27 | 153.056 | GTGGAAAGTAGAAAACAGAATAAGG      |
| Pr-28 | 157.356 | GTCCTTTCTAATGCTAACACTTCA       |
| Pr-29 | 164.899 | GCTTGGGCTTCCACTTCTTG           |
| Pr-30 | 169.112 | ACCTGAATATGTACCCCTTAATCT       |

***Primers for eQTL analysis***

| <b>Primer name</b> | <b>Sequence (5' to 3')</b>    |
|--------------------|-------------------------------|
| HPRT-f             | ATCAGACTGAAGAGCTATTGTAATGACCA |
| HPRT-r             | TGGCTTATATCCAACACTTCGTG       |
| TBP-f              | GAATATAATCCCAAGCGGTTTG        |
| TBP-r              | ACTTCACATCACAGCTCCCC          |
| hSCYL3-q-f         | GAAGATGGACACTGGAAGCTAG        |
| hSCYL3-q-r         | TGGGAGAGTTGTGAATTCTGG         |
| hKIFAP3-q-f        | GATGAAGACCCTGAAAACCAAAC       |
| hKIFAP3-q-r        | TCCTCAGCAAGATTCAGAAGC         |
| hMETTL11B-q-f      | AGCTATCTCTACCTGCTGGAA         |
| hMETTL11B-q-r      | TGGCTGGTACTTCTTGGTAGA         |
| hGORAB-q-f         | CGAGATTTGGGCACTTTTGG          |
| hGORAB-q-r         | GTCGCTGTGGTTCAAATGG           |
| hPRRX1-q-f         | CTGATGCTTTTGTGCGAGAAG         |
| hPRRX1-q-r         | GTAGGATTTGAGGAGGGAAGC         |
| hMROH9-q-f         | CTGTCTTTTTGTGTTCCCATG         |
| hMROH9-q-r         | CTGGAGGCTATGACTTTTACCG        |

**Supplementary Table S2: List of Variants Observed in Targeted Sequencing**

| Chr | Variant     | Position  | REF | ALT | MAF-ALL | MAF-cases | MAF-controls | BETA    | OR     | SE     | P.value | Class      |
|-----|-------------|-----------|-----|-----|---------|-----------|--------------|---------|--------|--------|---------|------------|
| 1   | 1:170555164 | 170555164 | A   | T   | 0.004   | 0.005     | 0.003        |         |        |        |         | Rare SNP   |
| 1   | 1:170555183 | 170555183 | A   | T   | 0.001   | 0.001     | 0            |         |        |        |         | Rare SNP   |
| 1   | rs7535455   | 170555234 | C   | G   | 0.299   | 0.305     | 0.293        | 0.0576  | 1.0593 | 0.0996 | 0.563   | Common SNP |
| 1   | 1:170555242 | 170555242 | C   | T   | 0.001   | 0.001     | 0            |         |        |        |         | Rare SNP   |
| 1   | 1:170555270 | 170555270 | G   | T   | 0.001   | 0.001     | 0            |         |        |        |         | Rare SNP   |
| 1   | 1:170555278 | 170555278 | G   | C   | 0.001   | 0         | 0.001        |         |        |        |         | Rare SNP   |
| 1   | 1:170555484 | 170555484 | A   | G   | 0.001   | 0.001     | 0            |         |        |        |         | Rare SNP   |
| 1   | 1:170555581 | 170555581 | A   | C   | 0.002   | 0.001     | 0.003        |         |        |        |         | Rare SNP   |
| 1   | rs12753115  | 170555736 | C   | T   | 0.012   | 0.012     | 0.012        | 0.035   | 1.0357 | 0.4334 | 0.9356  | Common SNP |
| 1   | 1:170555755 | 170555755 | T   | G   | 0.001   | 0         | 0.001        |         |        |        |         | Rare SNP   |
| 1   | 1:170555773 | 170555773 | G   | A   | 0.001   | 0         | 0.001        |         |        |        |         | Rare SNP   |
| 1   | 1:170555872 | 170555872 | A   | G   | 0.001   | 0.002     | 0            |         |        |        |         | Rare SNP   |
| 1   | 1:170556052 | 170556052 | G   | C   | 0.001   | 0.001     | 0            |         |        |        |         | Rare SNP   |
| 1   | 1:170556209 | 170556209 | T   | C   | 0.002   | 0.002     | 0.001        |         |        |        |         | Rare SNP   |
| 1   | 1:170556506 | 170556506 | C   | T   | 0.001   | 0         | 0.002        |         |        |        |         | Rare SNP   |
| 1   | 1:170556675 | 170556675 | C   | T   | 0.007   | 0.008     | 0.006        |         |        |        |         | Rare SNP   |
| 1   | 1:170556722 | 170556722 | T   | G   | 0.001   | 0.001     | 0            |         |        |        |         | Rare SNP   |
| 1   | 1:170556884 | 170556884 | A   | G   | 0.001   | 0.001     | 0            |         |        |        |         | Rare SNP   |
| 1   | 1:170557026 | 170557026 | C   | T   | 0.001   | 0.001     | 0            |         |        |        |         | Rare SNP   |
| 1   | 1:170557180 | 170557180 | G   | A   | 0.001   | 0.001     | 0.001        |         |        |        |         | Rare SNP   |
| 1   | 1:170557439 | 170557439 | G   | A   | 0.001   | 0         | 0.001        |         |        |        |         | Rare SNP   |
| 1   | 1:170557512 | 170557512 | A   | G   | 0.001   | 0         | 0.001        |         |        |        |         | Rare SNP   |
| 1   | 1:170557546 | 170557546 | A   | T   | 0.001   | 0         | 0.001        |         |        |        |         | Rare SNP   |
| 1   | rs77189053  | 170557577 | A   | G   | 0.001   | 0.001     | 0            |         |        |        |         | Rare SNP   |
| 1   | 1:170557754 | 170557754 | C   | T   | 0.001   | 0.001     | 0.001        |         |        |        |         | Rare SNP   |
| 1   | 1:170557945 | 170557945 | G   | A   | 0.001   | 0.001     | 0            |         |        |        |         | Rare SNP   |
| 1   | rs68174929  | 170557971 | C   | T   | 0.057   | 0.051     | 0.063        | -0.2387 | 0.7877 | 0.2051 | 0.2443  | Common SNP |

|   |             |           |   |   |       |       |       |         |        |        |        |  |            |
|---|-------------|-----------|---|---|-------|-------|-------|---------|--------|--------|--------|--|------------|
| 1 | 1:170558024 | 170558024 | G | A | 0.002 | 0.002 | 0.002 |         |        |        |        |  | Rare SNP   |
| 1 | 1:170558061 | 170558061 | G | A | 0.001 | 0.001 | 0     |         |        |        |        |  | Rare SNP   |
| 1 | rs12745912  | 170558213 | A | G | 0.291 | 0.297 | 0.285 | 0.0536  | 1.055  | 0.0999 | 0.5915 |  | Common SNP |
| 1 | 1:170558269 | 170558269 | C | T | 0.002 | 0.001 | 0.002 |         |        |        |        |  | Rare SNP   |
| 1 | 1:170558293 | 170558293 | T | C | 0.001 | 0     | 0.001 |         |        |        |        |  | Rare SNP   |
| 1 | 1:170558372 | 170558372 | A | T | 0.001 | 0     | 0.001 |         |        |        |        |  | Rare SNP   |
| 1 | 1:170558373 | 170558373 | T | C | 0.001 | 0.001 | 0     |         |        |        |        |  | Rare SNP   |
| 1 | 1:170558464 | 170558464 | G | A | 0.001 | 0     | 0.001 |         |        |        |        |  | Rare SNP   |
| 1 | 1:170558668 | 170558668 | G | A | 0.001 | 0     | 0.001 |         |        |        |        |  | Rare SNP   |
| 1 | 1:170558704 | 170558704 | G | A | 0.001 | 0.001 | 0     |         |        |        |        |  | Rare SNP   |
| 1 | 1:170558744 | 170558744 | G | A | 0.001 | 0     | 0.001 |         |        |        |        |  | Rare SNP   |
| 1 | rs6659073   | 170558831 | T | G | 0.001 | 0     | 0.001 |         |        |        |        |  | Rare SNP   |
| 1 | rs12750882  | 170558873 | A | T | 0.224 | 0.238 | 0.209 | 0.1624  | 1.1763 | 0.1094 | 0.1379 |  | Common SNP |
| 1 | 1:170558906 | 170558906 | T | G | 0.001 | 0     | 0.001 |         |        |        |        |  | Rare SNP   |
| 1 | rs59597570  | 170559256 | G | C | 0.355 | 0.367 | 0.344 | 0.1011  | 1.1064 | 0.0967 | 0.296  |  | Common SNP |
| 1 | 1:170559333 | 170559333 | G | A | 0.001 | 0     | 0.002 |         |        |        |        |  | Rare SNP   |
| 1 | 1:170559467 | 170559467 | C | G | 0.001 | 0.001 | 0     |         |        |        |        |  | Rare SNP   |
| 1 | 1:170559515 | 170559515 | G | C | 0.001 | 0.002 | 0     |         |        |        |        |  | Rare SNP   |
| 1 | 1:170559741 | 170559741 | C | T | 0.001 | 0.001 | 0     |         |        |        |        |  | Rare SNP   |
| 1 | 1:170559810 | 170559810 | T | C | 0.001 | 0.001 | 0     |         |        |        |        |  | Rare SNP   |
| 1 | 1:170559864 | 170559864 | A | G | 0.001 | 0     | 0.001 |         |        |        |        |  | Rare SNP   |
| 1 | 1:170559898 | 170559898 | G | C | 0.001 | 0.001 | 0     |         |        |        |        |  | Rare SNP   |
| 1 | 1:170560031 | 170560031 | G | A | 0.001 | 0     | 0.001 |         |        |        |        |  | Rare SNP   |
| 1 | 1:170560046 | 170560046 | T | C | 0.001 | 0.001 | 0     |         |        |        |        |  | Rare SNP   |
| 1 | rs4656788   | 170560110 | C | G | 0.356 | 0.342 | 0.371 | -0.1234 | 0.8839 | 0.0967 | 0.2021 |  | Common SNP |
| 1 | 1:170560143 | 170560143 | T | C | 0.001 | 0     | 0.001 |         |        |        |        |  | Rare SNP   |
| 1 | 1:170560158 | 170560158 | C | G | 0.001 | 0     | 0.001 |         |        |        |        |  | Rare SNP   |
| 1 | 1:170560199 | 170560199 | C | G | 0.01  | 0.011 | 0.01  | 0.1012  | 1.1065 | 0.4651 | 0.8277 |  | Common SNP |
| 1 | 1:170560258 | 170560258 | C | G | 0.001 | 0.001 | 0     |         |        |        |        |  | Rare SNP   |
| 1 | 1:170560272 | 170560272 | A | G | 0.001 | 0     | 0.001 |         |        |        |        |  | Rare SNP   |
| 1 | rs6680785   | 170560332 | C | T | 0.494 | 0.465 | 0.454 | 0.3123  | 1.3666 | 0.0922 | 0.0007 |  | Common SNP |

|   |             |           |   |   |       |       |       |         |        |        |        |  |            |
|---|-------------|-----------|---|---|-------|-------|-------|---------|--------|--------|--------|--|------------|
| 1 | 1:170560454 | 170560454 | T | C | 0.001 | 0     | 0.001 |         |        |        |        |  | Rare SNP   |
| 1 | rs6658866   | 170560604 | A | G | 0.441 | 0.483 | 0.399 | 0.3461  | 1.4135 | 0.0955 | 0.0003 |  | Common SNP |
| 1 | 1:170560680 | 170560680 | G | A | 0.001 | 0     | 0.001 |         |        |        |        |  | Rare SNP   |
| 1 | rs10919436  | 170560729 | G | C | 0.001 | 0     | 0.002 |         |        |        |        |  | Rare SNP   |
| 1 | 1:170560732 | 170560732 | T | C | 0.001 | 0.001 | 0     |         |        |        |        |  | Rare SNP   |
| 1 | rs11808978  | 170560767 | A | G | 0.14  | 0.139 | 0.142 | -0.0331 | 0.9675 | 0.1325 | 0.8029 |  | Common SNP |
| 1 | 1:170560804 | 170560804 | C | T | 0.005 | 0.004 | 0.005 |         |        |        |        |  | Rare SNP   |
| 1 | 1:170560923 | 170560923 | T | C | 0.005 | 0.002 | 0.009 |         |        |        |        |  | Rare SNP   |
| 1 | 1:170561102 | 170561102 | G | A | 0.001 | 0     | 0.001 |         |        |        |        |  | Rare SNP   |
| 1 | 1:170561119 | 170561119 | A | G | 0.001 | 0.001 | 0     |         |        |        |        |  | Rare SNP   |
| 1 | 1:170561226 | 170561226 | C | T | 0.001 | 0.001 | 0     |         |        |        |        |  | Rare SNP   |
| 1 | 1:170561227 | 170561227 | G | A | 0.008 | 0.004 | 0.011 |         |        |        |        |  | Rare SNP   |
| 1 | 1:170561346 | 170561346 | G | C | 0.001 | 0     | 0.001 |         |        |        |        |  | Rare SNP   |
| 1 | 1:170561704 | 170561704 | G | A | 0.001 | 0     | 0.001 |         |        |        |        |  | Rare SNP   |
| 1 | 1:170561728 | 170561728 | C | G | 0.001 | 0     | 0.001 |         |        |        |        |  | Rare SNP   |
| 1 | 1:170561826 | 170561826 | T | A | 0.001 | 0.001 | 0     |         |        |        |        |  | Rare SNP   |
| 1 | 1:170561855 | 170561855 | A | C | 0.001 | 0.001 | 0     |         |        |        |        |  | Rare SNP   |
| 1 | rs75487153  | 170561948 | G | C | 0.001 | 0.001 | 0     |         |        |        |        |  | Rare SNP   |
| 1 | 1:170562135 | 170562135 | A | G | 0.001 | 0     | 0.001 |         |        |        |        |  | Rare SNP   |
| 1 | 1:170562354 | 170562354 | G | T | 0.001 | 0.001 | 0     |         |        |        |        |  | Rare SNP   |
| 1 | 1:170562359 | 170562359 | G | A | 0.001 | 0     | 0.001 |         |        |        |        |  | Rare SNP   |
| 1 | 1:170562534 | 170562534 | C | G | 0.001 | 0.001 | 0     |         |        |        |        |  | Rare SNP   |
| 1 | 1:170562591 | 170562591 | G | C | 0.001 | 0     | 0.001 |         |        |        |        |  | Rare SNP   |
| 1 | 1:170562642 | 170562642 | G | A | 0.002 | 0.001 | 0.002 |         |        |        |        |  | Rare SNP   |
| 1 | 1:170562787 | 170562787 | C | G | 0.001 | 0.001 | 0     |         |        |        |        |  | Rare SNP   |
| 1 | 1:170563072 | 170563072 | A | G | 0.001 | 0     | 0.001 |         |        |        |        |  | Rare SNP   |
| 1 | 1:170563077 | 170563077 | G | A | 0.001 | 0     | 0.001 |         |        |        |        |  | Rare SNP   |
| 1 | rs577827    | 170563083 | A | C | 0.407 | 0.363 | 0.45  | -0.3668 | 0.6929 | 0.0962 | 0.0001 |  | Common SNP |
| 1 | rs12027180  | 170563205 | C | T | 0.276 | 0.239 | 0.313 | -0.3762 | 0.6865 | 0.1067 | 0.0004 |  | Common SNP |
| 1 | 1:170563391 | 170563391 | A | G | 0.001 | 0     | 0.001 |         |        |        |        |  | Rare SNP   |
| 1 | 1:170563424 | 170563424 | A | G | 0.001 | 0.001 | 0     |         |        |        |        |  | Rare SNP   |

|   |             |           |   |   |       |       |       |         |        |        |        |  |            |
|---|-------------|-----------|---|---|-------|-------|-------|---------|--------|--------|--------|--|------------|
| 1 | 1:170563453 | 170563453 | C | T | 0.001 | 0.001 | 0     |         |        |        |        |  | Rare SNP   |
| 1 | 1:170563543 | 170563543 | A | G | 0.001 | 0     | 0.001 |         |        |        |        |  | Rare SNP   |
| 1 | 1:170563740 | 170563740 | A | T | 0.001 | 0     | 0.001 |         |        |        |        |  | Rare SNP   |
| 1 | 1:170563753 | 170563753 | A | C | 0.001 | 0     | 0.001 |         |        |        |        |  | Rare SNP   |
| 1 | rs76263197  | 170564017 | G | A | 0.005 | 0.003 | 0.006 |         |        |        |        |  | Rare SNP   |
| 1 | 1:170564031 | 170564031 | C | G | 0.001 | 0     | 0.001 |         |        |        |        |  | Rare SNP   |
| 1 | 1:170564033 | 170564033 | C | G | 0.001 | 0     | 0.001 |         |        |        |        |  | Rare SNP   |
| 1 | rs6670015   | 170564268 | A | G | 0.019 | 0.018 | 0.019 | -0.0406 | 0.9602 | 0.3183 | 0.8985 |  | Common SNP |
| 1 | rs6697185   | 170564545 | G | A | 0.019 | 0.018 | 0.019 | -0.0406 | 0.9602 | 0.3183 | 0.8985 |  | Common SNP |
| 1 | 1:170564579 | 170564579 | C | T | 0.001 | 0.001 | 0     |         |        |        |        |  | Rare SNP   |
| 1 | 1:170564596 | 170564596 | G | T | 0.002 | 0.003 | 0.001 |         |        |        |        |  | Rare SNP   |
| 1 | 1:170564661 | 170564661 | A | T | 0.002 | 0     | 0.003 |         |        |        |        |  | Rare SNP   |
| 1 | 1:170564728 | 170564728 | G | T | 0.001 | 0.001 | 0     |         |        |        |        |  | Rare SNP   |
| 1 | 1:170564804 | 170564804 | C | A | 0.006 | 0.006 | 0.006 |         |        |        |        |  | Rare SNP   |
| 1 | rs502706    | 170564829 | A | G | 0.134 | 0.136 | 0.132 | 0.0408  | 1.0417 | 0.136  | 0.7641 |  | Common SNP |
| 1 | 1:170564910 | 170564910 | G | C | 0.001 | 0     | 0.001 |         |        |        |        |  | Rare SNP   |
| 1 | 1:170565020 | 170565020 | G | T | 0.001 | 0     | 0.001 |         |        |        |        |  | Rare SNP   |
| 1 | 1:170565064 | 170565064 | T | A | 0.001 | 0     | 0.001 |         |        |        |        |  | Rare SNP   |
| 1 | rs2050000   | 170565191 | A | G | 0.133 | 0.136 | 0.13  | 0.0498  | 1.051  | 0.1362 | 0.7148 |  | Common SNP |
| 1 | 1:170565258 | 170565258 | T | A | 0.002 | 0.002 | 0.001 |         |        |        |        |  | Rare SNP   |
| 1 | 1:170565267 | 170565267 | T | C | 0.004 | 0.002 | 0.006 |         |        |        |        |  | Rare SNP   |
| 1 | 1:170565279 | 170565279 | G | C | 0.001 | 0.001 | 0     |         |        |        |        |  | Rare SNP   |
| 1 | 1:170565280 | 170565280 | T | C | 0.001 | 0.001 | 0     |         |        |        |        |  | Rare SNP   |
| 1 | rs34879535  | 170565756 | G | T | 0.201 | 0.228 | 0.175 | 0.344   | 1.4106 | 0.1187 | 0.0037 |  | Common SNP |
| 1 | 1:170565824 | 170565824 | G | A | 0.001 | 0     | 0.001 |         |        |        |        |  | Rare SNP   |
| 1 | 1:170565857 | 170565857 | A | G | 0.001 | 0.001 | 0     |         |        |        |        |  | Rare SNP   |
| 1 | 1:170565871 | 170565871 | C | T | 0.001 | 0.001 | 0     |         |        |        |        |  | Rare SNP   |
| 1 | 1:170565897 | 170565897 | A | G | 0.001 | 0     | 0.001 |         |        |        |        |  | Rare SNP   |
| 1 | 1:170565951 | 170565951 | C | G | 0.001 | 0.001 | 0     |         |        |        |        |  | Rare SNP   |
| 1 | 1:170565979 | 170565979 | G | A | 0.001 | 0     | 0.001 |         |        |        |        |  | Rare SNP   |
| 1 | 1:170565981 | 170565981 | C | T | 0.001 | 0.001 | 0.001 |         |        |        |        |  | Rare SNP   |

|   |             |           |   |   |       |       |       |         |        |        |        |            |
|---|-------------|-----------|---|---|-------|-------|-------|---------|--------|--------|--------|------------|
| 1 | rs763567    | 170566005 | A | G | 0.441 | 0.484 | 0.398 | 0.3555  | 1.4269 | 0.0955 | 0.0002 | Common SNP |
| 1 | 1:170566042 | 170566042 | C | T | 0.005 | 0.005 | 0.004 |         |        |        |        | Rare SNP   |
| 1 | rs682301    | 170566071 | G | A | 0.127 | 0.119 | 0.136 | -0.1428 | 0.8669 | 0.1361 | 0.2941 | Common SNP |
| 1 | 1:170566171 | 170566171 | T | C | 0.001 | 0     | 0.001 |         |        |        |        | Rare SNP   |
| 1 | 1:170566452 | 170566452 | T | C | 0.001 | 0     | 0.001 |         |        |        |        | Rare SNP   |
| 1 | rs78296504  | 170566551 | A | G | 0.019 | 0.018 | 0.019 | -0.0406 | 0.9602 | 0.3183 | 0.8985 | Common SNP |
| 1 | 1:170566684 | 170566684 | C | T | 0.002 | 0.002 | 0.001 |         |        |        |        | Rare SNP   |
| 1 | 1:170566915 | 170566915 | C | T | 0.001 | 0.001 | 0.001 |         |        |        |        | Rare SNP   |
| 1 | 1:170566926 | 170566926 | G | A | 0.001 | 0     | 0.001 |         |        |        |        | Rare SNP   |
| 1 | rs77685192  | 170567000 | A | G | 0.019 | 0.018 | 0.019 | -0.0406 | 0.9602 | 0.3183 | 0.8985 | Common SNP |
| 1 | 1:170567355 | 170567355 | G | A | 0.001 | 0.001 | 0     |         |        |        |        | Rare SNP   |
| 1 | rs1928715   | 170567437 | C | T | 0.439 | 0.481 | 0.398 | 0.3435  | 1.4099 | 0.0956 | 0.0003 | Common SNP |
| 1 | 1:170567534 | 170567534 | A | G | 0.001 | 0     | 0.001 |         |        |        |        | Rare SNP   |
| 1 | 1:170567803 | 170567803 | C | A | 0.001 | 0     | 0.001 |         |        |        |        | Rare SNP   |
| 1 | 1:170567818 | 170567818 | G | A | 0.001 | 0.001 | 0     |         |        |        |        | Rare SNP   |
| 1 | 1:170567910 | 170567910 | A | T | 0.002 | 0.001 | 0.002 |         |        |        |        | Rare SNP   |
| 1 | 1:170568002 | 170568002 | G | A | 0.023 | 0.023 | 0.023 | 0.0101  | 1.0102 | 0.3167 | 0.9745 | Common SNP |
| 1 | 1:170568089 | 170568089 | T | C | 0.001 | 0.001 | 0     |         |        |        |        | Rare SNP   |
| 1 | rs75680574  | 170568413 | A | G | 0.019 | 0.018 | 0.019 | -0.0406 | 0.9602 | 0.3183 | 0.8985 | Common SNP |
| 1 | 1:170568425 | 170568425 | C | T | 0.001 | 0     | 0.002 |         |        |        |        | Rare SNP   |
| 1 | rs7517209   | 170568496 | C | T | 0.116 | 0.113 | 0.119 | -0.0584 | 0.9433 | 0.1469 | 0.6911 | Common SNP |
| 1 | 1:170568518 | 170568518 | A | G | 0.001 | 0     | 0.002 |         |        |        |        | Rare SNP   |
| 1 | 1:170568602 | 170568602 | A | G | 0.002 | 0.002 | 0.002 |         |        |        |        | Rare SNP   |
| 1 | rs6662298   | 170568740 | C | G | 0.019 | 0.018 | 0.019 | -0.0406 | 0.9602 | 0.3183 | 0.8985 | Common SNP |
| 1 | 1:170568795 | 170568795 | C | A | 0.001 | 0     | 0.001 |         |        |        |        | Rare SNP   |
| 1 | 1:170568857 | 170568857 | C | T | 0.001 | 0.001 | 0     |         |        |        |        | Rare SNP   |
| 1 | rs12742164  | 170568896 | T | G | 0.446 | 0.491 | 0.4   | 0.3825  | 1.4659 | 0.0963 | 0.0001 | Common SNP |
| 1 | 1:170568979 | 170568979 | T | C | 0.001 | 0.001 | 0     |         |        |        |        | Rare SNP   |
| 1 | 1:170569002 | 170569002 | C | A | 0.001 | 0     | 0.002 |         |        |        |        | Rare SNP   |
| 1 | 1:170569043 | 170569043 | T | C | 0.001 | 0.001 | 0     |         |        |        |        | Rare SNP   |
| 1 | 1:170569083 | 170569083 | C | A | 0.001 | 0.001 | 0     |         |        |        |        | Rare SNP   |



|   |             |           |   |   |       |       |       |         |        |        |        |            |
|---|-------------|-----------|---|---|-------|-------|-------|---------|--------|--------|--------|------------|
| 1 | rs3903239   | 170569317 | A | G | 0.44  | 0.482 | 0.398 | 0.3469  | 1.4147 | 0.0955 | 0.0003 | Common SNP |
| 1 | 1:170569366 | 170569366 | A | G | 0.001 | 0     | 0.002 |         |        |        |        | Rare SNP   |
| 1 | 1:170569380 | 170569380 | G | C | 0.001 | 0.001 | 0     |         |        |        |        | Rare SNP   |
| 1 | rs6675882   | 170569393 | T | A | 0.019 | 0.018 | 0.019 | -0.0406 | 0.9602 | 0.3183 | 0.8985 | Common SNP |
| 1 | 1:170569421 | 170569421 | A | C | 0.001 | 0     | 0.001 |         |        |        |        | Rare SNP   |
| 1 | 1:170569433 | 170569433 | G | T | 0.001 | 0.001 | 0     |         |        |        |        | Rare SNP   |
| 1 | 1:170569446 | 170569446 | C | G | 0.006 | 0.008 | 0.004 |         |        |        |        | Rare SNP   |
| 1 | 1:170569488 | 170569488 | C | T | 0.001 | 0.001 | 0     |         |        |        |        | Rare SNP   |
| 1 | 1:170569508 | 170569508 | A | G | 0.001 | 0     | 0.001 |         |        |        |        | Rare SNP   |
| 1 | 1:170569537 | 170569537 | C | T | 0.016 | 0.013 | 0.019 | -0.3915 | 0.676  | 0.3683 | 0.288  | Common SNP |
| 1 | rs76098720  | 170569616 | T | C | 0.019 | 0.018 | 0.019 | -0.0406 | 0.9602 | 0.3183 | 0.8985 | Common SNP |
| 1 | 1:170569769 | 170569769 | G | A | 0.002 | 0.001 | 0.002 |         |        |        |        | Rare SNP   |
| 1 | 1:170569843 | 170569843 | A | T | 0.001 | 0     | 0.002 |         |        |        |        | Rare SNP   |
| 1 | rs61826207  | 170569997 | A | G | 0.016 | 0.019 | 0.013 | 0.4082  | 1.5041 | 0.3691 | 0.2688 | Common SNP |
| 1 | 1:170570314 | 170570314 | G | T | 0.01  | 0.01  | 0.01  | 0.0301  | 1.0306 | 0.4771 | 0.9497 | Common SNP |
| 1 | rs575600    | 170571004 | T | G | 0.128 | 0.12  | 0.136 | -0.1331 | 0.8754 | 0.136  | 0.3276 | Common SNP |
| 1 | 1:170571019 | 170571019 | A | T | 0.001 | 0.001 | 0     |         |        |        |        | Rare SNP   |
| 1 | 1:170571408 | 170571408 | G | A | 0.019 | 0.018 | 0.02  | -0.0878 | 0.9159 | 0.3151 | 0.7804 | Common SNP |
| 1 | 1:170571491 | 170571491 | T | C | 0.019 | 0.018 | 0.019 | -0.0406 | 0.9602 | 0.3183 | 0.8985 | Common SNP |
| 1 | 1:170571510 | 170571510 | C | T | 0.001 | 0.001 | 0.001 |         |        |        |        | Rare SNP   |
| 1 | 1:170571513 | 170571513 | C | T | 0.019 | 0.018 | 0.019 | -0.0406 | 0.9602 | 0.3183 | 0.8985 | Common SNP |
| 1 | 1:170571534 | 170571534 | G | A | 0.001 | 0     | 0.001 |         |        |        |        | Rare SNP   |
| 1 | 1:170571578 | 170571578 | G | A | 0.019 | 0.018 | 0.019 | -0.0406 | 0.9602 | 0.3183 | 0.8985 | Common SNP |
| 1 | rs496577    | 170572142 | C | T | 0.121 | 0.119 | 0.123 | -0.0367 | 0.964  | 0.1457 | 0.8013 | Common SNP |
| 1 | 1:170572283 | 170572283 | G | A | 0.006 | 0.005 | 0.006 |         |        |        |        | Rare SNP   |
| 1 | 1:170572328 | 170572328 | C | T | 0.001 | 0     | 0.001 |         |        |        |        | Rare SNP   |
| 1 | 1:170572329 | 170572329 | G | A | 0.001 | 0.001 | 0     |         |        |        |        | Rare SNP   |
| 1 | 1:170572483 | 170572483 | G | T | 0.001 | 0.001 | 0     |         |        |        |        | Rare SNP   |
| 1 | 1:170572674 | 170572674 | A | G | 0.001 | 0     | 0.001 |         |        |        |        | Rare SNP   |
| 1 | 1:170572744 | 170572744 | G | C | 0.001 | 0     | 0.001 |         |        |        |        | Rare SNP   |
| 1 | 1:170572800 | 170572800 | T | C | 0.001 | 0.001 | 0     |         |        |        |        | Rare SNP   |

|   |             |           |   |   |       |       |       |         |        |        |        |  |            |
|---|-------------|-----------|---|---|-------|-------|-------|---------|--------|--------|--------|--|------------|
| 1 | 1:170572848 | 170572848 | T | C | 0.001 | 0     | 0.002 |         |        |        |        |  | Rare SNP   |
| 1 | 1:170572889 | 170572889 | G | C | 0.001 | 0.001 | 0     |         |        |        |        |  | Rare SNP   |
| 1 | rs560746    | 170573214 | T | C | 0.129 | 0.12  | 0.138 | -0.1497 | 0.861  | 0.1352 | 0.2681 |  | Common SNP |
| 1 | 1:170573346 | 170573346 | A | G | 0.001 | 0     | 0.001 |         |        |        |        |  | Rare SNP   |
| 1 | 1:170573365 | 170573365 | T | A | 0.001 | 0.001 | 0     |         |        |        |        |  | Rare SNP   |
| 1 | 1:170573392 | 170573392 | A | G | 0.001 | 0.001 | 0     |         |        |        |        |  | Rare SNP   |
| 1 | 1:170573532 | 170573532 | T | C | 0.005 | 0.008 | 0.002 |         |        |        |        |  | Rare SNP   |
| 1 | 1:170573587 | 170573587 | C | A | 0.001 | 0     | 0.001 |         |        |        |        |  | Rare SNP   |
| 1 | 1:170573716 | 170573716 | T | C | 0.001 | 0.001 | 0     |         |        |        |        |  | Rare SNP   |
| 1 | rs476810    | 170573814 | T | C | 0.408 | 0.364 | 0.453 | -0.3719 | 0.6894 | 0.0962 | 0.0001 |  | Common SNP |
| 1 | rs12128300  | 170573848 | C | T | 0.139 | 0.143 | 0.136 | 0.0577  | 1.0594 | 0.134  | 0.6668 |  | Common SNP |
| 1 | 1:170573902 | 170573902 | G | C | 0.001 | 0     | 0.001 |         |        |        |        |  | Rare SNP   |
| 1 | 1:170574010 | 170574010 | A | T | 0.001 | 0     | 0.001 |         |        |        |        |  | Rare SNP   |
| 1 | 1:170574151 | 170574151 | A | G | 0.001 | 0     | 0.001 |         |        |        |        |  | Rare SNP   |
| 1 | rs74123294  | 170574222 | A | G | 0.001 | 0.001 | 0     |         |        |        |        |  | Rare SNP   |
| 1 | 1:170574240 | 170574240 | C | T | 0.002 | 0.002 | 0.001 |         |        |        |        |  | Rare SNP   |
| 1 | 1:170574274 | 170574274 | C | G | 0.001 | 0.002 | 0     |         |        |        |        |  | Rare SNP   |
| 1 | 1:170574326 | 170574326 | C | T | 0.001 | 0     | 0.001 |         |        |        |        |  | Rare SNP   |
| 1 | 1:170574390 | 170574390 | T | C | 0.003 | 0.002 | 0.003 |         |        |        |        |  | Rare SNP   |
| 1 | rs10919438  | 170574436 | A | C | 0.133 | 0.136 | 0.13  | 0.0498  | 1.051  | 0.1362 | 0.7148 |  | Common SNP |
| 1 | 1:170574641 | 170574641 | T | C | 0.001 | 0     | 0.001 |         |        |        |        |  | Rare SNP   |
| 1 | 1:170574666 | 170574666 | G | A | 0.001 | 0.001 | 0.001 |         |        |        |        |  | Rare SNP   |
| 1 | 1:170574694 | 170574694 | A | G | 0.001 | 0.001 | 0     |         |        |        |        |  | Rare SNP   |
| 1 | 1:170574701 | 170574701 | G | A | 0.001 | 0.001 | 0     |         |        |        |        |  | Rare SNP   |
| 1 | rs1234233   | 170574928 | C | T | 0.408 | 0.364 | 0.452 | -0.3685 | 0.6918 | 0.0963 | 0.0001 |  | Common SNP |
| 1 | 1:170575005 | 170575005 | T | G | 0.001 | 0.001 | 0     |         |        |        |        |  | Rare SNP   |
| 1 | 1:170575123 | 170575123 | A | G | 0.001 | 0     | 0.001 |         |        |        |        |  | Rare SNP   |
| 1 | 1:170575571 | 170575571 | T | C | 0.001 | 0.001 | 0     |         |        |        |        |  | Rare SNP   |
| 1 | 1:170575588 | 170575588 | C | A | 0.001 | 0.001 | 0     |         |        |        |        |  | Rare SNP   |
| 1 | 1:170575687 | 170575687 | G | T | 0.001 | 0     | 0.001 |         |        |        |        |  | Rare SNP   |
| 1 | 1:170575825 | 170575825 | C | T | 0.003 | 0.004 | 0.002 |         |        |        |        |  | Rare SNP   |

|   |             |           |   |   |       |       |       |         |        |        |        |  |            |
|---|-------------|-----------|---|---|-------|-------|-------|---------|--------|--------|--------|--|------------|
| 1 | 1:170575854 | 170575854 | G | A | 0.002 | 0.003 | 0     |         |        |        |        |  | Rare SNP   |
| 1 | rs61824860  | 170575981 | A | C | 0.014 | 0.017 | 0.011 | 0.5033  | 1.6542 | 0.4095 | 0.2189 |  | Common SNP |
| 1 | 1:170575982 | 170575982 | A | T | 0.001 | 0     | 0.002 |         |        |        |        |  | Rare SNP   |
| 1 | rs2206062   | 170576107 | T | C | 0.44  | 0.482 | 0.398 | 0.3469  | 1.4147 | 0.0955 | 0.0003 |  | Common SNP |
| 1 | 1:170576217 | 170576217 | T | C | 0.001 | 0     | 0.001 |         |        |        |        |  | Rare SNP   |
| 1 | 1:170576379 | 170576379 | G | C | 0.001 | 0     | 0.001 |         |        |        |        |  | Rare SNP   |
| 1 | 1:170576563 | 170576563 | C | A | 0.001 | 0.001 | 0     |         |        |        |        |  | Rare SNP   |
| 1 | 1:170576610 | 170576610 | C | T | 0.001 | 0.001 | 0     |         |        |        |        |  | Rare SNP   |
| 1 | rs566850    | 170576738 | A | G | 0.408 | 0.364 | 0.452 | -0.3685 | 0.6918 | 0.0963 | 0.0001 |  | Common SNP |
| 1 | rs74461390  | 170576851 | C | T | 0.019 | 0.018 | 0.019 | -0.0406 | 0.9602 | 0.3183 | 0.8985 |  | Common SNP |
| 1 | 1:170576977 | 170576977 | C | G | 0.001 | 0     | 0.001 |         |        |        |        |  | Rare SNP   |
| 1 | rs722597    | 170577055 | G | A | 0.295 | 0.265 | 0.325 | -0.2964 | 0.7435 | 0.1037 | 0.0042 |  | Common SNP |
| 1 | rs647438    | 170577235 | G | T | 0.424 | 0.385 | 0.463 | -0.3224 | 0.7244 | 0.0952 | 0.0007 |  | Common SNP |
| 1 | 1:170577307 | 170577307 | C | T | 0.001 | 0.002 | 0     |         |        |        |        |  | Rare SNP   |
| 1 | rs10919439  | 170577428 | G | A | 0.118 | 0.115 | 0.121 | -0.0572 | 0.9444 | 0.1461 | 0.6956 |  | Common SNP |
| 1 | rs10919441  | 170579089 | T | A | 0.28  | 0.244 | 0.316 | -0.3722 | 0.6892 | 0.1068 | 0.0005 |  | Common SNP |
| 1 | 1:170579226 | 170579226 | T | G | 0.002 | 0.002 | 0.001 |         |        |        |        |  | Rare SNP   |
| 1 | 1:170579230 | 170579230 | G | A | 0.001 | 0.001 | 0     |         |        |        |        |  | Rare SNP   |
| 1 | 1:170580385 | 170580385 | C | G | 0.001 | 0     | 0.001 |         |        |        |        |  | Rare SNP   |
| 1 | rs6664490   | 170580418 | C | T | 0.133 | 0.135 | 0.13  | 0.0406  | 1.0414 | 0.137  | 0.767  |  | Common SNP |
| 1 | rs553905    | 170580477 | A | G | 0.408 | 0.364 | 0.452 | -0.3685 | 0.6918 | 0.0963 | 0.0001 |  | Common SNP |
| 1 | rs10919444  | 170581634 | G | A | 0.443 | 0.485 | 0.402 | 0.3434  | 1.4097 | 0.0956 | 0.0003 |  | Common SNP |
| 1 | rs34252585  | 170581687 | G | A | 0.279 | 0.244 | 0.315 | -0.3684 | 0.6918 | 0.107  | 0.0006 |  | Common SNP |
| 1 | 1:170581770 | 170581770 | C | T | 0.001 | 0.001 | 0     |         |        |        |        |  | Rare SNP   |
| 1 | 1:170581775 | 170581775 | A | G | 0.001 | 0     | 0.001 |         |        |        |        |  | Rare SNP   |
| 1 | 1:170582137 | 170582137 | A | G | 0.007 | 0.007 | 0.006 |         |        |        |        |  | Rare SNP   |
| 1 | 1:170582261 | 170582261 | T | C | 0.006 | 0.006 | 0.005 |         |        |        |        |  | Rare SNP   |
| 1 | 1:170582284 | 170582284 | C | T | 0.005 | 0.005 | 0.004 |         |        |        |        |  | Rare SNP   |
| 1 | 1:170582401 | 170582401 | T | G | 0.001 | 0.001 | 0     |         |        |        |        |  | Rare SNP   |
| 1 | rs7540157   | 170582464 | T | C | 0.134 | 0.136 | 0.132 | 0.0408  | 1.0417 | 0.136  | 0.7641 |  | Common SNP |
| 1 | 1:170582486 | 170582486 | G | C | 0.001 | 0.001 | 0     |         |        |        |        |  | Rare SNP   |

|   |             |           |   |   |       |       |       |         |        |        |        |  |            |
|---|-------------|-----------|---|---|-------|-------|-------|---------|--------|--------|--------|--|------------|
| 1 | 1:170582507 | 170582507 | T | C | 0.002 | 0.003 | 0.001 |         |        |        |        |  | Rare SNP   |
| 1 | 1:170582540 | 170582540 | A | T | 0.001 | 0     | 0.001 |         |        |        |        |  | Rare SNP   |
| 1 | rs1952675   | 170582575 | A | G | 0.44  | 0.482 | 0.398 | 0.3469  | 1.4147 | 0.0955 | 0.0003 |  | Common SNP |
| 1 | rs1928711   | 170582602 | T | G | 0.019 | 0.018 | 0.019 | -0.0406 | 0.9602 | 0.3183 | 0.8985 |  | Common SNP |
| 1 | rs6427266   | 170582610 | A | G | 0.134 | 0.136 | 0.132 | 0.0408  | 1.0417 | 0.136  | 0.7641 |  | Common SNP |
| 1 | rs6674195   | 170582926 | C | T | 0.134 | 0.136 | 0.132 | 0.0408  | 1.0417 | 0.136  | 0.7641 |  | Common SNP |
| 1 | 1:170583034 | 170583034 | C | T | 0.019 | 0.018 | 0.019 | -0.0406 | 0.9602 | 0.3183 | 0.8985 |  | Common SNP |
| 1 | rs564298    | 170583040 | G | A | 0.134 | 0.136 | 0.132 | 0.0408  | 1.0417 | 0.136  | 0.7641 |  | Common SNP |
| 1 | 1:170583067 | 170583067 | A | G | 0.011 | 0.009 | 0.014 | -0.4975 | 0.608  | 0.4548 | 0.2739 |  | Common SNP |
| 1 | 1:170583100 | 170583100 | G | A | 0.001 | 0     | 0.001 |         |        |        |        |  | Rare SNP   |
| 1 | 1:170583151 | 170583151 | A | G | 0.001 | 0.001 | 0.001 |         |        |        |        |  | Rare SNP   |
| 1 | rs77058424  | 170583324 | G | C | 0.413 | 0.373 | 0.452 | -0.3129 | 0.7313 | 0.0947 | 0.001  |  | Common SNP |
| 1 | 1:170583608 | 170583608 | C | T | 0.018 | 0.017 | 0.019 | -0.1021 | 0.9029 | 0.361  | 0.7774 |  | Common SNP |
| 1 | 1:170583716 | 170583716 | T | C | 0.001 | 0     | 0.001 |         |        |        |        |  | Rare SNP   |
| 1 | 1:170583760 | 170583760 | C | T | 0.015 | 0.011 | 0.018 | -0.5451 | 0.5798 | 0.4047 | 0.178  |  | Common SNP |
| 1 | 1:170583867 | 170583867 | A | T | 0.001 | 0.001 | 0     |         |        |        |        |  | Rare SNP   |
| 1 | rs59152245  | 170583893 | T | C | 0.133 | 0.136 | 0.13  | 0.0498  | 1.051  | 0.1362 | 0.7148 |  | Common SNP |
| 1 | rs6690642   | 170583944 | T | C | 0.438 | 0.481 | 0.397 | 0.3494  | 1.4182 | 0.0958 | 0.0003 |  | Common SNP |
| 1 | 1:170583960 | 170583960 | C | T | 0.001 | 0     | 0.002 |         |        |        |        |  | Rare SNP   |
| 1 | 1:170584219 | 170584219 | T | C | 0.001 | 0.001 | 0     |         |        |        |        |  | Rare SNP   |
| 1 | 1:170584419 | 170584419 | C | T | 0.017 | 0.013 | 0.022 | -0.5239 | 0.5922 | 0.3724 | 0.1594 |  | Common SNP |
| 1 | 1:170584676 | 170584676 | G | T | 0.001 | 0     | 0.001 |         |        |        |        |  | Rare SNP   |
| 1 | 1:170584747 | 170584747 | A | G | 0.001 | 0     | 0.001 |         |        |        |        |  | Rare SNP   |
| 1 | 1:170584794 | 170584794 | G | A | 0.002 | 0     | 0.003 |         |        |        |        |  | Rare SNP   |
| 1 | 1:170584817 | 170584817 | G | T | 0.001 | 0     | 0.001 |         |        |        |        |  | Rare SNP   |
| 1 | 1:170584892 | 170584892 | C | T | 0.001 | 0.001 | 0     |         |        |        |        |  | Rare SNP   |
| 1 | 1:170584934 | 170584934 | T | C | 0.001 | 0.001 | 0     |         |        |        |        |  | Rare SNP   |
| 1 | 1:170584993 | 170584993 | G | T | 0.001 | 0.001 | 0     |         |        |        |        |  | Rare SNP   |
| 1 | 1:170585051 | 170585051 | C | T | 0.001 | 0     | 0.001 |         |        |        |        |  | Rare SNP   |
| 1 | rs2206063   | 170585097 | T | C | 0.281 | 0.246 | 0.317 | -0.3687 | 0.6916 | 0.1071 | 0.0006 |  | Common SNP |
| 1 | 1:170585276 | 170585276 | C | T | 0.001 | 0.001 | 0     |         |        |        |        |  | Rare SNP   |

|   |             |           |   |   |       |       |       |         |        |        |        |  |            |
|---|-------------|-----------|---|---|-------|-------|-------|---------|--------|--------|--------|--|------------|
| 1 | 1:170585293 | 170585293 | T | G | 0.001 | 0.001 | 0     |         |        |        |        |  | Rare SNP   |
| 1 | rs621240    | 170585471 | C | T | 0.133 | 0.135 | 0.132 | 0.0316  | 1.0321 | 0.1368 | 0.8172 |  | Common SNP |
| 1 | 1:170585519 | 170585519 | A | T | 0.001 | 0     | 0.001 |         |        |        |        |  | Rare SNP   |
| 1 | 1:170585620 | 170585620 | G | A | 0.001 | 0.001 | 0     |         |        |        |        |  | Rare SNP   |
| 1 | 1:170585760 | 170585760 | G | C | 0.001 | 0.001 | 0     |         |        |        |        |  | Rare SNP   |
| 1 | rs619456    | 170585832 | A | C | 0.41  | 0.365 | 0.455 | -0.3798 | 0.684  | 0.0967 | 0.0001 |  | Common SNP |
| 1 | 1:170585933 | 170585933 | G | A | 0.001 | 0     | 0.001 |         |        |        |        |  | Rare SNP   |
| 1 | 1:170585961 | 170585961 | G | C | 0.001 | 0.001 | 0     |         |        |        |        |  | Rare SNP   |
| 1 | 1:170585998 | 170585998 | A | G | 0.001 | 0.001 | 0.001 |         |        |        |        |  | Rare SNP   |
| 1 | 1:170586077 | 170586077 | G | A | 0.001 | 0.001 | 0     |         |        |        |        |  | Rare SNP   |
| 1 | 1:170586233 | 170586233 | C | G | 0.001 | 0.002 | 0     |         |        |        |        |  | Rare SNP   |
| 1 | 1:170586263 | 170586263 | T | C | 0.001 | 0     | 0.002 |         |        |        |        |  | Rare SNP   |
| 1 | rs736791    | 170586315 | G | A | 0.437 | 0.482 | 0.393 | 0.3673  | 1.4438 | 0.096  | 0.0001 |  | Common SNP |
| 1 | 1:170586403 | 170586403 | T | C | 0.002 | 0.003 | 0.001 |         |        |        |        |  | Rare SNP   |
| 1 | 1:170586505 | 170586505 | A | G | 0.001 | 0.001 | 0     |         |        |        |        |  | Rare SNP   |
| 1 | rs7541071   | 170586551 | C | G | 0.116 | 0.113 | 0.12  | -0.069  | 0.9333 | 0.1475 | 0.6398 |  | Common SNP |
| 1 | 1:170586586 | 170586586 | T | C | 0.001 | 0.001 | 0     |         |        |        |        |  | Rare SNP   |
| 1 | rs78769039  | 170586744 | A | C | 0.011 | 0.014 | 0.009 | 0.4323  | 1.5408 | 0.4209 | 0.3046 |  | Common SNP |
| 1 | 1:170586793 | 170586793 | T | G | 0.001 | 0     | 0.001 |         |        |        |        |  | Rare SNP   |
| 1 | 1:170587012 | 170587012 | C | T | 0.001 | 0     | 0.002 |         |        |        |        |  | Rare SNP   |
| 1 | rs574974    | 170587029 | T | G | 0.129 | 0.119 | 0.138 | -0.1621 | 0.8504 | 0.1366 | 0.2352 |  | Common SNP |
| 1 | 1:170587034 | 170587034 | A | G | 0.001 | 0     | 0.001 |         |        |        |        |  | Rare SNP   |
| 1 | 1:170587093 | 170587093 | A | G | 0.001 | 0     | 0.001 |         |        |        |        |  | Rare SNP   |
| 1 | 1:170587133 | 170587133 | T | C | 0.001 | 0     | 0.001 |         |        |        |        |  | Rare SNP   |
| 1 | rs576736    | 170587215 | A | G | 0.298 | 0.267 | 0.329 | -0.3021 | 0.7393 | 0.1039 | 0.0036 |  | Common SNP |
| 1 | rs577676    | 170587340 | C | T | 0.434 | 0.399 | 0.468 | -0.2888 | 0.7492 | 0.0964 | 0.0027 |  | Common SNP |
| 1 | 1:170587428 | 170587428 | G | A | 0.001 | 0     | 0.001 |         |        |        |        |  | Rare SNP   |
| 1 | 1:170587548 | 170587548 | C | T | 0.001 | 0.001 | 0     |         |        |        |        |  | Rare SNP   |
| 1 | 1:170587635 | 170587635 | G | A | 0.001 | 0.001 | 0     |         |        |        |        |  | Rare SNP   |
| 1 | 1:170587642 | 170587642 | G | A | 0.001 | 0     | 0.001 |         |        |        |        |  | Rare SNP   |
| 1 | 1:170587683 | 170587683 | G | A | 0.001 | 0     | 0.001 |         |        |        |        |  | Rare SNP   |

|   |             |           |   |   |       |       |       |         |        |        |        |  |            |
|---|-------------|-----------|---|---|-------|-------|-------|---------|--------|--------|--------|--|------------|
| 1 | 1:170587687 | 170587687 | C | G | 0.001 | 0     | 0.002 |         |        |        |        |  | Rare SNP   |
| 1 | 1:170587808 | 170587808 | C | T | 0.001 | 0.001 | 0     |         |        |        |        |  | Rare SNP   |
| 1 | 1:170588036 | 170588036 | T | C | 0.006 | 0.006 | 0.006 |         |        |        |        |  | Rare SNP   |
| 1 | 1:170588063 | 170588063 | G | A | 0.001 | 0     | 0.001 |         |        |        |        |  | Rare SNP   |
| 1 | 1:170588492 | 170588492 | G | T | 0.001 | 0     | 0.001 |         |        |        |        |  | Rare SNP   |
| 1 | rs2022373   | 170588594 | T | C | 0.281 | 0.246 | 0.317 | -0.3727 | 0.6889 | 0.1077 | 0.0005 |  | Common SNP |
| 1 | 1:170588727 | 170588727 | A | G | 0.001 | 0     | 0.002 |         |        |        |        |  | Rare SNP   |
| 1 | 1:170588803 | 170588803 | A | G | 0.001 | 0     | 0.001 |         |        |        |        |  | Rare SNP   |
| 1 | 1:170588926 | 170588926 | C | T | 0.001 | 0.001 | 0     |         |        |        |        |  | Rare SNP   |
| 1 | 1:170588950 | 170588950 | G | A | 0.001 | 0     | 0.001 |         |        |        |        |  | Rare SNP   |
| 1 | 1:170588954 | 170588954 | T | C | 0.001 | 0     | 0.001 |         |        |        |        |  | Rare SNP   |
| 1 | 1:170588992 | 170588992 | T | C | 0.001 | 0     | 0.001 |         |        |        |        |  | Rare SNP   |
| 1 | 1:170589209 | 170589209 | A | G | 0.001 | 0.001 | 0     |         |        |        |        |  | Rare SNP   |
| 1 | 1:170589290 | 170589290 | T | C | 0.001 | 0     | 0.001 |         |        |        |        |  | Rare SNP   |
| 1 | 1:170589313 | 170589313 | G | T | 0.001 | 0     | 0.001 |         |        |        |        |  | Rare SNP   |
| 1 | rs10489231  | 170589437 | G | A | 0.281 | 0.246 | 0.317 | -0.3727 | 0.6889 | 0.1077 | 0.0005 |  | Common SNP |
| 1 | 1:170589558 | 170589558 | T | G | 0.001 | 0.001 | 0     |         |        |        |        |  | Rare SNP   |
| 1 | 1:170589568 | 170589568 | G | A | 0.001 | 0.001 | 0.001 |         |        |        |        |  | Rare SNP   |
| 1 | rs2022372   | 170589910 | T | A | 0.437 | 0.482 | 0.393 | 0.3673  | 1.4438 | 0.096  | 0.0001 |  | Common SNP |
| 1 | 1:170589938 | 170589938 | T | C | 0.001 | 0.001 | 0     |         |        |        |        |  | Rare SNP   |
| 1 | 1:170590124 | 170590124 | A | G | 0.001 | 0     | 0.001 |         |        |        |        |  | Rare SNP   |
| 1 | 1:170590138 | 170590138 | C | T | 0.004 | 0.003 | 0.004 |         |        |        |        |  | Rare SNP   |
| 1 | 1:170590142 | 170590142 | A | G | 0.002 | 0.002 | 0.001 |         |        |        |        |  | Rare SNP   |
| 1 | 1:170590189 | 170590189 | T | C | 0.001 | 0     | 0.001 |         |        |        |        |  | Rare SNP   |
| 1 | 1:170590223 | 170590223 | A | G | 0.001 | 0.001 | 0     |         |        |        |        |  | Rare SNP   |
| 1 | 1:170590447 | 170590447 | G | A | 0.001 | 0     | 0.001 |         |        |        |        |  | Rare SNP   |
| 1 | rs12031871  | 170590567 | G | T | 0.298 | 0.267 | 0.329 | -0.3021 | 0.7393 | 0.1039 | 0.0036 |  | Common SNP |
| 1 | 1:170590678 | 170590678 | G | T | 0.001 | 0     | 0.001 |         |        |        |        |  | Rare SNP   |
| 1 | 1:170590770 | 170590770 | A | G | 0.005 | 0.006 | 0.003 |         |        |        |        |  | Rare SNP   |
| 1 | rs7537420   | 170590849 | G | A | 0.117 | 0.114 | 0.121 | -0.0673 | 0.9349 | 0.1455 | 0.6437 |  | Common SNP |
| 1 | 1:170590914 | 170590914 | A | G | 0.001 | 0     | 0.001 |         |        |        |        |  | Rare SNP   |

|   |             |           |   |   |       |       |       |         |        |        |        |  |            |
|---|-------------|-----------|---|---|-------|-------|-------|---------|--------|--------|--------|--|------------|
| 1 | rs78738600  | 170590965 | A | C | 0.001 | 0.001 | 0     |         |        |        |        |  | Rare SNP   |
| 1 | 1:170591077 | 170591077 | A | G | 0.001 | 0     | 0.001 |         |        |        |        |  | Rare SNP   |
| 1 | 1:170591080 | 170591080 | A | T | 0.001 | 0     | 0.001 |         |        |        |        |  | Rare SNP   |
| 1 | rs651386    | 170591310 | A | T | 0.414 | 0.381 | 0.446 | -0.2814 | 0.7547 | 0.0972 | 0.0038 |  | Common SNP |
| 1 | rs11585752  | 170591419 | C | T | 0.001 | 0.001 | 0.001 |         |        |        |        |  | Rare SNP   |
| 1 | rs10753817  | 170591808 | T | G | 0.298 | 0.267 | 0.329 | -0.3021 | 0.7393 | 0.1038 | 0.0036 |  | Common SNP |
| 1 | rs17549441  | 170592126 | C | A | 0.204 | 0.22  | 0.188 | 0.204   | 1.2263 | 0.1192 | 0.0868 |  | Common SNP |
| 1 | 1:170592163 | 170592163 | A | G | 0.001 | 0     | 0.001 |         |        |        |        |  | Rare SNP   |
| 1 | rs502479    | 170592385 | C | T | 0.133 | 0.136 | 0.129 | 0.0599  | 1.0618 | 0.137  | 0.6618 |  | Common SNP |
| 1 | 1:170592640 | 170592640 | G | C | 0.002 | 0.003 | 0.001 |         |        |        |        |  | Rare SNP   |
| 1 | 1:170592839 | 170592839 | T | C | 0.001 | 0.001 | 0     |         |        |        |        |  | Rare SNP   |
| 1 | 1:170592900 | 170592900 | C | T | 0.001 | 0.001 | 0     |         |        |        |        |  | Rare SNP   |
| 1 | 1:170592933 | 170592933 | A | T | 0.001 | 0     | 0.001 |         |        |        |        |  | Rare SNP   |
| 1 | 1:170593136 | 170593136 | C | T | 0.002 | 0.001 | 0.002 |         |        |        |        |  | Rare SNP   |
| 1 | 1:170593185 | 170593185 | G | A | 0.002 | 0.002 | 0.002 |         |        |        |        |  | Rare SNP   |
| 1 | 1:170593449 | 170593449 | G | A | 0.003 | 0.005 | 0.001 |         |        |        |        |  | Rare SNP   |
| 1 | 1:170593488 | 170593488 | C | T | 0.001 | 0     | 0.001 |         |        |        |        |  | Rare SNP   |
| 1 | 1:170593603 | 170593603 | A | G | 0.006 | 0.004 | 0.008 |         |        |        |        |  | Rare SNP   |
| 1 | 1:170593612 | 170593612 | C | T | 0.001 | 0.001 | 0     |         |        |        |        |  | Rare SNP   |
| 1 | 1:170594040 | 170594040 | G | A | 0.001 | 0     | 0.001 |         |        |        |        |  | Rare SNP   |
| 1 | rs12072276  | 170594069 | A | G | 0.298 | 0.267 | 0.329 | -0.3021 | 0.7393 | 0.1038 | 0.0036 |  | Common SNP |
| 1 | rs10919446  | 170594116 | G | A | 0.298 | 0.267 | 0.329 | -0.3021 | 0.7393 | 0.1038 | 0.0036 |  | Common SNP |
| 1 | 1:170594152 | 170594152 | A | T | 0.001 | 0.001 | 0.001 |         |        |        |        |  | Rare SNP   |
| 1 | rs12127271  | 170594170 | A | T | 0.115 | 0.114 | 0.116 | -0.0265 | 0.9738 | 0.147  | 0.8569 |  | Common SNP |
| 1 | 1:170594194 | 170594194 | G | A | 0.001 | 0.001 | 0     |         |        |        |        |  | Rare SNP   |
| 1 | rs57294654  | 170594294 | C | A | 0.019 | 0.018 | 0.019 | -0.0406 | 0.9602 | 0.3183 | 0.8985 |  | Common SNP |
| 1 | 1:170594367 | 170594367 | T | C | 0.001 | 0.001 | 0     |         |        |        |        |  | Rare SNP   |
| 1 | 1:170594514 | 170594514 | T | C | 0.001 | 0     | 0.001 |         |        |        |        |  | Rare SNP   |
| 1 | 1:170594589 | 170594589 | C | T | 0.001 | 0     | 0.001 |         |        |        |        |  | Rare SNP   |
| 1 | 1:170594676 | 170594676 | A | T | 0.001 | 0     | 0.001 |         |        |        |        |  | Rare SNP   |
| 1 | 1:170594699 | 170594699 | A | G | 0.001 | 0.001 | 0     |         |        |        |        |  | Rare SNP   |

|   |             |           |   |   |       |       |       |         |        |        |        |  |            |
|---|-------------|-----------|---|---|-------|-------|-------|---------|--------|--------|--------|--|------------|
| 1 | 1:170594783 | 170594783 | C | T | 0.001 | 0.001 | 0     |         |        |        |        |  | Rare SNP   |
| 1 | 1:170594980 | 170594980 | G | A | 0.001 | 0     | 0.001 |         |        |        |        |  | Rare SNP   |
| 1 | 1:170595026 | 170595026 | C | T | 0.019 | 0.018 | 0.019 | -0.0406 | 0.9602 | 0.3183 | 0.8985 |  | Common SNP |
| 1 | 1:170595072 | 170595072 | G | A | 0.001 | 0     | 0.001 |         |        |        |        |  | Rare SNP   |
| 1 | rs12074059  | 170595118 | C | T | 0.281 | 0.246 | 0.316 | -0.3725 | 0.689  | 0.1086 | 0.0006 |  | Common SNP |
| 1 | 1:170595254 | 170595254 | C | A | 0.001 | 0.001 | 0     |         |        |        |        |  | Rare SNP   |
| 1 | 1:170595484 | 170595484 | A | G | 0.001 | 0.001 | 0     |         |        |        |        |  | Rare SNP   |
| 1 | 1:170595540 | 170595540 | C | A | 0.001 | 0     | 0.001 |         |        |        |        |  | Rare SNP   |
| 1 | 1:170595568 | 170595568 | A | G | 0.001 | 0     | 0.001 |         |        |        |        |  | Rare SNP   |
| 1 | rs77336792  | 170595700 | C | A | 0.019 | 0.018 | 0.019 | -0.0406 | 0.9602 | 0.3183 | 0.8985 |  | Common SNP |
| 1 | 1:170595794 | 170595794 | G | A | 0.001 | 0     | 0.001 |         |        |        |        |  | Rare SNP   |
| 1 | 1:170595906 | 170595906 | G | T | 0.001 | 0.001 | 0     |         |        |        |        |  | Rare SNP   |
| 1 | 1:170596064 | 170596064 | C | T | 0.001 | 0.001 | 0     |         |        |        |        |  | Rare SNP   |
| 1 | rs494521    | 170596072 | C | T | 0.458 | 0.499 | 0.417 | 0.3363  | 1.3998 | 0.0951 | 0.0004 |  | Common SNP |
| 1 | 1:170596078 | 170596078 | C | T | 0.001 | 0     | 0.001 |         |        |        |        |  | Rare SNP   |
| 1 | rs1234275   | 170596258 | A | G | 0.438 | 0.481 | 0.397 | 0.349   | 1.4176 | 0.0958 | 0.0003 |  | Common SNP |
| 1 | rs1234274   | 170596373 | A | G | 0.438 | 0.479 | 0.397 | 0.3454  | 1.4126 | 0.0959 | 0.0003 |  | Common SNP |
| 1 | 1:170596376 | 170596376 | C | T | 0.001 | 0.001 | 0     |         |        |        |        |  | Rare SNP   |
| 1 | rs2421327   | 170596400 | T | C | 0.116 | 0.115 | 0.118 | -0.0258 | 0.9746 | 0.1466 | 0.8606 |  | Common SNP |
| 1 | rs11577602  | 170596545 | A | T | 0.306 | 0.274 | 0.337 | -0.2798 | 0.7559 | 0.1012 | 0.0057 |  | Common SNP |
| 1 | 1:170598600 | 170598600 | A | G | 0.001 | 0.001 | 0     |         |        |        |        |  | Rare SNP   |
| 1 | 1:170599341 | 170599341 | G | A | 0.001 | 0.001 | 0.001 |         |        |        |        |  | Rare SNP   |
| 1 | 1:170599353 | 170599353 | T | C | 0.001 | 0.001 | 0.001 |         |        |        |        |  | Rare SNP   |
| 1 | 1:170599435 | 170599435 | T | C | 0.001 | 0.001 | 0     |         |        |        |        |  | Rare SNP   |
| 1 | 1:170599466 | 170599466 | G | C | 0.001 | 0.001 | 0.001 |         |        |        |        |  | Rare SNP   |
| 1 | rs10919448  | 170599573 | T | C | 0.301 | 0.273 | 0.328 | -0.2646 | 0.7675 | 0.1039 | 0.0109 |  | Common SNP |
| 1 | 1:170599888 | 170599888 | C | A | 0.002 | 0.002 | 0.001 |         |        |        |        |  | Rare SNP   |
| 1 | 1:170599949 | 170599949 | C | G | 0.001 | 0     | 0.001 |         |        |        |        |  | Rare SNP   |
| 1 | 1:170600008 | 170600008 | G | C | 0.001 | 0     | 0.001 |         |        |        |        |  | Rare SNP   |
| 1 | 1:170600013 | 170600013 | C | A | 0.001 | 0     | 0.001 |         |        |        |        |  | Rare SNP   |
| 1 | rs80308926  | 170600026 | C | T | 0.011 | 0.006 | 0.016 | -0.9261 | 0.3961 | 0.4879 | 0.0578 |  | Common SNP |



|   |             |           |   |   |       |       |       |         |        |        |        |            |
|---|-------------|-----------|---|---|-------|-------|-------|---------|--------|--------|--------|------------|
| 1 | rs609369    | 170600132 | A | T | 0.262 | 0.257 | 0.267 | -0.0552 | 0.9463 | 0.1044 | 0.5966 | Common SNP |
| 1 | rs609368    | 170600133 | A | G | 0.262 | 0.257 | 0.267 | -0.0552 | 0.9463 | 0.1044 | 0.5966 | Common SNP |
| 1 | 1:170600213 | 170600213 | C | T | 0.001 | 0.001 | 0     |         |        |        |        | Rare SNP   |
| 1 | 1:170600441 | 170600441 | G | C | 0.001 | 0.001 | 0     |         |        |        |        | Rare SNP   |
| 1 | 1:170600634 | 170600634 | C | T | 0.001 | 0     | 0.001 |         |        |        |        | Rare SNP   |
| 1 | 1:170600676 | 170600676 | C | T | 0.001 | 0.001 | 0     |         |        |        |        | Rare SNP   |
| 1 | 1:170600677 | 170600677 | G | A | 0.001 | 0.002 | 0     |         |        |        |        | Rare SNP   |
| 1 | rs55886634  | 170600737 | C | T | 0.205 | 0.221 | 0.19  | 0.1951  | 1.2154 | 0.1185 | 0.0998 | Common SNP |
| 1 | 1:170600798 | 170600798 | C | T | 0.001 | 0     | 0.001 |         |        |        |        | Rare SNP   |
| 1 | 1:170600807 | 170600807 | A | C | 0.001 | 0.001 | 0     |         |        |        |        | Rare SNP   |
| 1 | 1:170601111 | 170601111 | T | C | 0.001 | 0.001 | 0.001 |         |        |        |        | Rare SNP   |
| 1 | 1:170601122 | 170601122 | C | T | 0.001 | 0     | 0.001 |         |        |        |        | Rare SNP   |
| 1 | 1:170601198 | 170601198 | A | G | 0.001 | 0.001 | 0     |         |        |        |        | Rare SNP   |
| 1 | rs12068805  | 170601313 | T | C | 0.282 | 0.246 | 0.318 | -0.3784 | 0.685  | 0.1077 | 0.0004 | Common SNP |
| 1 | 1:170601350 | 170601350 | A | G | 0.002 | 0     | 0.004 |         |        |        |        | Rare SNP   |
| 1 | 1:170601723 | 170601723 | T | C | 0.001 | 0     | 0.001 |         |        |        |        | Rare SNP   |
| 1 | rs675761    | 170601817 | A | C | 0.262 | 0.257 | 0.267 | -0.0552 | 0.9463 | 0.1044 | 0.5966 | Common SNP |
| 1 | 1:170601865 | 170601865 | T | C | 0.005 | 0.004 | 0.005 |         |        |        |        | Rare SNP   |
| 1 | 1:170601884 | 170601884 | C | T | 0.001 | 0.002 | 0     |         |        |        |        | Rare SNP   |
| 1 | rs12566725  | 170601935 | C | T | 0.281 | 0.246 | 0.317 | -0.3727 | 0.6889 | 0.1077 | 0.0005 | Common SNP |
| 1 | 1:170602313 | 170602313 | T | G | 0.002 | 0.001 | 0.002 |         |        |        |        | Rare SNP   |
| 1 | 1:170602369 | 170602369 | C | A | 0.001 | 0.001 | 0     |         |        |        |        | Rare SNP   |
| 1 | 1:170602434 | 170602434 | A | T | 0.001 | 0.001 | 0     |         |        |        |        | Rare SNP   |
| 1 | 1:170602505 | 170602505 | A | G | 0.001 | 0.001 | 0     |         |        |        |        | Rare SNP   |
| 1 | 1:170602579 | 170602579 | T | C | 0.001 | 0.001 | 0     |         |        |        |        | Rare SNP   |
| 1 | 1:170602596 | 170602596 | C | T | 0.002 | 0.003 | 0.001 |         |        |        |        | Rare SNP   |
| 1 | 1:170602778 | 170602778 | G | A | 0.001 | 0     | 0.001 |         |        |        |        | Rare SNP   |
| 1 | 1:170602850 | 170602850 | G | T | 0.001 | 0     | 0.001 |         |        |        |        | Rare SNP   |
| 1 | 1:170602862 | 170602862 | T | C | 0.001 | 0     | 0.001 |         |        |        |        | Rare SNP   |
| 1 | 1:170603019 | 170603019 | A | C | 0.001 | 0     | 0.001 |         |        |        |        | Rare SNP   |
| 1 | 1:170603303 | 170603303 | A | G | 0.001 | 0     | 0.001 |         |        |        |        | Rare SNP   |

|   |             |           |   |   |       |       |       |         |        |        |        |  |            |
|---|-------------|-----------|---|---|-------|-------|-------|---------|--------|--------|--------|--|------------|
| 1 | 1:170603420 | 170603420 | G | A | 0.001 | 0.001 | 0     |         |        |        |        |  | Rare SNP   |
| 1 | 1:170603510 | 170603510 | G | C | 0.001 | 0     | 0.001 |         |        |        |        |  | Rare SNP   |
| 1 | 1:170603525 | 170603525 | G | A | 0.001 | 0     | 0.001 |         |        |        |        |  | Rare SNP   |
| 1 | 1:170603637 | 170603637 | T | C | 0.001 | 0     | 0.001 |         |        |        |        |  | Rare SNP   |
| 1 | rs4656792   | 170603810 | A | G | 0.129 | 0.12  | 0.138 | -0.1513 | 0.8596 | 0.1357 | 0.2647 |  | Common SNP |
| 1 | 1:170603973 | 170603973 | A | T | 0.001 | 0     | 0.001 |         |        |        |        |  | Rare SNP   |
| 1 | 1:170604039 | 170604039 | C | T | 0.001 | 0     | 0.001 |         |        |        |        |  | Rare SNP   |
| 1 | rs75617361  | 170604092 | A | G | 0.001 | 0.001 | 0     |         |        |        |        |  | Rare SNP   |
| 1 | rs598993    | 170604122 | T | C | 0.457 | 0.498 | 0.416 | 0.3367  | 1.4003 | 0.0951 | 0.0004 |  | Common SNP |
| 1 | 1:170604204 | 170604204 | A | G | 0.001 | 0     | 0.001 |         |        |        |        |  | Rare SNP   |
| 1 | 1:170604373 | 170604373 | A | T | 0.006 | 0.009 | 0.003 |         |        |        |        |  | Rare SNP   |
| 1 | 1:170604387 | 170604387 | C | T | 0.001 | 0     | 0.001 |         |        |        |        |  | Rare SNP   |
| 1 | 1:170604506 | 170604506 | A | G | 0.001 | 0     | 0.001 |         |        |        |        |  | Rare SNP   |
| 1 | 1:170604531 | 170604531 | G | A | 0.001 | 0.001 | 0.001 |         |        |        |        |  | Rare SNP   |
| 1 | rs6664726   | 170604551 | G | A | 0.262 | 0.257 | 0.267 | -0.0552 | 0.9463 | 0.1044 | 0.5966 |  | Common SNP |
| 1 | 1:170604774 | 170604774 | A | G | 0.003 | 0.003 | 0.003 |         |        |        |        |  | Rare SNP   |
| 1 | 1:170604820 | 170604820 | T | C | 0.001 | 0     | 0.001 |         |        |        |        |  | Rare SNP   |
| 1 | 1:170604851 | 170604851 | T | C | 0.001 | 0     | 0.001 |         |        |        |        |  | Rare SNP   |
| 1 | rs12123164  | 170604909 | T | C | 0.132 | 0.136 | 0.128 | 0.0688  | 1.0712 | 0.1371 | 0.6158 |  | Common SNP |
| 1 | rs541557    | 170604938 | A | G | 0.457 | 0.498 | 0.416 | 0.3367  | 1.4003 | 0.0951 | 0.0004 |  | Common SNP |
| 1 | 1:170605045 | 170605045 | A | G | 0.001 | 0.001 | 0     |         |        |        |        |  | Rare SNP   |
| 1 | 1:170605087 | 170605087 | G | A | 0.001 | 0.001 | 0     |         |        |        |        |  | Rare SNP   |
| 1 | 1:170605355 | 170605355 | G | A | 0.001 | 0     | 0.001 |         |        |        |        |  | Rare SNP   |
| 1 | 1:170605429 | 170605429 | A | C | 0.019 | 0.018 | 0.019 | -0.0406 | 0.9602 | 0.3183 | 0.8985 |  | Common SNP |
| 1 | 1:170605596 | 170605596 | G | A | 0.007 | 0.01  | 0.004 |         |        |        |        |  | Rare SNP   |
| 1 | 1:170605977 | 170605977 | A | G | 0.001 | 0     | 0.001 |         |        |        |        |  | Rare SNP   |
| 1 | rs9427196   | 170606008 | T | C | 0.129 | 0.12  | 0.137 | -0.144  | 0.8659 | 0.1364 | 0.2911 |  | Common SNP |
| 1 | 1:170606033 | 170606033 | C | T | 0.001 | 0     | 0.001 |         |        |        |        |  | Rare SNP   |
| 1 | rs644784    | 170606086 | G | T | 0.28  | 0.246 | 0.315 | -0.3628 | 0.6957 | 0.1078 | 0.0008 |  | Common SNP |
| 1 | 1:170606102 | 170606102 | C | T | 0.001 | 0     | 0.001 |         |        |        |        |  | Rare SNP   |
| 1 | 1:170606222 | 170606222 | C | T | 0.001 | 0     | 0.001 |         |        |        |        |  | Rare SNP   |

|   |             |           |   |   |       |       |       |         |        |        |        |  |            |
|---|-------------|-----------|---|---|-------|-------|-------|---------|--------|--------|--------|--|------------|
| 1 | 1:170606245 | 170606245 | G | C | 0.002 | 0.003 | 0.001 |         |        |        |        |  | Rare SNP   |
| 1 | rs656539    | 170606354 | C | T | 0.28  | 0.246 | 0.315 | -0.3628 | 0.6957 | 0.1078 | 0.0008 |  | Common SNP |
| 1 | 1:170606512 | 170606512 | G | A | 0.001 | 0.001 | 0.001 |         |        |        |        |  | Rare SNP   |
| 1 | rs12134712  | 170606515 | C | A | 0.132 | 0.136 | 0.128 | 0.0688  | 1.0712 | 0.1371 | 0.6158 |  | Common SNP |
| 1 | 1:170606600 | 170606600 | A | G | 0.001 | 0.001 | 0     |         |        |        |        |  | Rare SNP   |
| 1 | rs6427267   | 170606665 | G | A | 0.261 | 0.257 | 0.266 | -0.0498 | 0.9514 | 0.1046 | 0.6339 |  | Common SNP |
| 1 | 1:170606891 | 170606891 | G | A | 0.001 | 0.002 | 0     |         |        |        |        |  | Rare SNP   |
| 1 | 1:170606973 | 170606973 | G | A | 0.001 | 0.002 | 0     |         |        |        |        |  | Rare SNP   |
| 1 | rs6671933   | 170606983 | G | A | 0.129 | 0.12  | 0.137 | -0.144  | 0.8659 | 0.1364 | 0.2911 |  | Common SNP |
| 1 | 1:170607015 | 170607015 | A | G | 0.001 | 0     | 0.001 |         |        |        |        |  | Rare SNP   |
| 1 | 1:170607407 | 170607407 | C | A | 0.002 | 0.002 | 0.002 |         |        |        |        |  | Rare SNP   |
| 1 | 1:170607627 | 170607627 | A | C | 0.001 | 0.001 | 0.001 |         |        |        |        |  | Rare SNP   |
| 1 | 1:170607879 | 170607879 | C | T | 0.001 | 0     | 0.001 |         |        |        |        |  | Rare SNP   |
| 1 | 1:170607923 | 170607923 | C | T | 0.001 | 0.001 | 0     |         |        |        |        |  | Rare SNP   |
| 1 | 1:170608008 | 170608008 | C | A | 0.002 | 0     | 0.003 |         |        |        |        |  | Rare SNP   |
| 1 | rs539045    | 170608081 | C | T | 0.455 | 0.496 | 0.414 | 0.3373  | 1.4012 | 0.0952 | 0.0004 |  | Common SNP |
| 1 | rs60278406  | 170608174 | A | G | 0.017 | 0.016 | 0.017 | -0.0438 | 0.9572 | 0.334  | 0.8958 |  | Common SNP |
| 1 | rs7541788   | 170608256 | T | A | 0.264 | 0.259 | 0.269 | -0.055  | 0.9465 | 0.1038 | 0.5961 |  | Common SNP |
| 1 | 1:170608321 | 170608321 | G | A | 0.024 | 0.019 | 0.029 | -0.4145 | 0.6607 | 0.3121 | 0.1841 |  | Common SNP |
| 1 | rs473832    | 170609190 | A | C | 0.438 | 0.479 | 0.397 | 0.3454  | 1.4126 | 0.0959 | 0.0003 |  | Common SNP |
| 1 | rs4656793   | 170609453 | C | T | 0.048 | 0.045 | 0.051 | -0.1086 | 0.8971 | 0.2108 | 0.6065 |  | Common SNP |
| 1 | rs6663446   | 170609471 | C | A | 0.017 | 0.016 | 0.017 | -0.0438 | 0.9572 | 0.334  | 0.8958 |  | Common SNP |
| 1 | rs1928709   | 170609494 | C | T | 0.132 | 0.136 | 0.128 | 0.0689  | 1.0713 | 0.1371 | 0.6155 |  | Common SNP |
| 1 | 1:170609498 | 170609498 | A | G | 0.001 | 0     | 0.001 |         |        |        |        |  | Rare SNP   |
| 1 | rs580487    | 170609625 | T | C | 0.455 | 0.496 | 0.415 | 0.3331  | 1.3953 | 0.0953 | 0.0005 |  | Common SNP |
| 1 | 1:170609656 | 170609656 | G | A | 0.004 | 0.003 | 0.005 |         |        |        |        |  | Rare SNP   |
| 1 | rs578928    | 170609743 | A | C | 0.281 | 0.246 | 0.317 | -0.3703 | 0.6905 | 0.1074 | 0.0006 |  | Common SNP |
| 1 | 1:170609759 | 170609759 | C | T | 0.003 | 0.001 | 0.004 |         |        |        |        |  | Rare SNP   |
| 1 | 1:170610240 | 170610240 | C | T | 0.001 | 0     | 0.001 |         |        |        |        |  | Rare SNP   |
| 1 | 1:170610246 | 170610246 | T | G | 0.001 | 0     | 0.001 |         |        |        |        |  | Rare SNP   |
| 1 | 1:170610665 | 170610665 | A | G | 0.001 | 0.001 | 0     |         |        |        |        |  | Rare SNP   |

|   |             |           |   |   |       |       |       |         |        |        |        |            |
|---|-------------|-----------|---|---|-------|-------|-------|---------|--------|--------|--------|------------|
| 1 | rs549449    | 170610710 | G | C | 0.281 | 0.245 | 0.317 | -0.3756 | 0.6869 | 0.1074 | 0.0005 | Common SNP |
| 1 | rs74743236  | 170610901 | C | T | 0.01  | 0.012 | 0.008 |         |        |        |        | Common SNP |
| 1 | 1:170610924 | 170610924 | G | A | 0.002 | 0     | 0.003 |         |        |        |        | Rare SNP   |
| 1 | rs9427197   | 170611057 | C | T | 0.264 | 0.259 | 0.269 | -0.055  | 0.9465 | 0.1038 | 0.5961 | Common SNP |
| 1 | rs12752097  | 170611138 | T | C | 0.009 | 0.009 | 0.009 |         |        |        |        | Rare SNP   |
| 1 | 1:170611179 | 170611179 | A | G | 0.001 | 0     | 0.002 |         |        |        |        | Rare SNP   |
| 1 | rs12132224  | 170611275 | G | A | 0.129 | 0.119 | 0.138 | -0.1611 | 0.8512 | 0.1358 | 0.2358 | Common SNP |
| 1 | rs61824885  | 170611354 | A | G | 0.136 | 0.14  | 0.132 | 0.0673  | 1.0696 | 0.1356 | 0.6198 | Common SNP |
| 1 | 1:170611482 | 170611482 | A | T | 0.002 | 0.003 | 0.001 |         |        |        |        | Rare SNP   |
| 1 | 1:170611650 | 170611650 | A | C | 0.001 | 0.001 | 0     |         |        |        |        | Rare SNP   |
| 1 | 1:170611663 | 170611663 | C | G | 0.001 | 0.001 | 0.001 |         |        |        |        | Rare SNP   |
| 1 | rs6670760   | 170611792 | G | A | 0.128 | 0.12  | 0.136 | -0.1365 | 0.8724 | 0.1371 | 0.3195 | Common SNP |
| 1 | 1:170611847 | 170611847 | G | C | 0.001 | 0     | 0.002 |         |        |        |        | Rare SNP   |
| 1 | 1:170612077 | 170612077 | C | A | 0.002 | 0.002 | 0.002 |         |        |        |        | Rare SNP   |
| 1 | rs4614316   | 170612109 | G | A | 0.264 | 0.259 | 0.269 | -0.055  | 0.9465 | 0.1038 | 0.5961 | Common SNP |
| 1 | 1:170612114 | 170612114 | T | C | 0.003 | 0.003 | 0.003 |         |        |        |        | Rare SNP   |
| 1 | 1:170612140 | 170612140 | G | A | 0.01  | 0.008 | 0.013 | -0.536  | 0.5851 | 0.4807 | 0.2648 | Common SNP |
| 1 | 1:170612193 | 170612193 | A | C | 0.002 | 0.001 | 0.002 |         |        |        |        | Rare SNP   |
| 1 | rs492804    | 170612262 | C | T | 0.438 | 0.481 | 0.397 | 0.3506  | 1.4199 | 0.096  | 0.0003 | Common SNP |
| 1 | rs79632764  | 170612284 | G | A | 0.002 | 0.001 | 0.002 |         |        |        |        | Rare SNP   |
| 1 | rs4265481   | 170612306 | C | T | 0.129 | 0.119 | 0.138 | -0.1611 | 0.8512 | 0.1358 | 0.2358 | Common SNP |
| 1 | rs7550424   | 170612507 | A | G | 0.017 | 0.016 | 0.017 | -0.0438 | 0.9572 | 0.334  | 0.8958 | Common SNP |
| 1 | 1:170612630 | 170612630 | G | A | 0.004 | 0.004 | 0.004 |         |        |        |        | Rare SNP   |
| 1 | 1:170612663 | 170612663 | G | C | 0.001 | 0     | 0.001 |         |        |        |        | Rare SNP   |
| 1 | rs639652    | 170612873 | G | A | 0.455 | 0.496 | 0.414 | 0.3373  | 1.4012 | 0.0952 | 0.0004 | Common SNP |
| 1 | rs639720    | 170612926 | G | C | 0.281 | 0.246 | 0.317 | -0.3703 | 0.6905 | 0.1074 | 0.0006 | Common SNP |
| 1 | 1:170612983 | 170612983 | C | A | 0.001 | 0     | 0.001 |         |        |        |        | Rare SNP   |
| 1 | rs725973    | 170613043 | T | A | 0.264 | 0.259 | 0.269 | -0.055  | 0.9465 | 0.1038 | 0.5961 | Common SNP |
| 1 | rs725974    | 170613251 | T | G | 0.136 | 0.14  | 0.132 | 0.0673  | 1.0696 | 0.1356 | 0.6198 | Common SNP |
| 1 | 1:170613352 | 170613352 | T | A | 0.001 | 0     | 0.002 |         |        |        |        | Rare SNP   |
| 1 | 1:170613357 | 170613357 | T | A | 0.001 | 0     | 0.001 |         |        |        |        | Rare SNP   |

|   |             |           |   |   |       |       |       |         |        |        |        |  |            |
|---|-------------|-----------|---|---|-------|-------|-------|---------|--------|--------|--------|--|------------|
| 1 | 1:170613468 | 170613468 | C | G | 0.005 | 0.005 | 0.005 |         |        |        |        |  | Rare SNP   |
| 1 | rs12135158  | 170613569 | G | C | 0.264 | 0.259 | 0.269 | -0.055  | 0.9465 | 0.1038 | 0.5961 |  | Common SNP |
| 1 | 1:170613578 | 170613578 | G | A | 0.001 | 0     | 0.002 |         |        |        |        |  | Rare SNP   |
| 1 | 1:170613676 | 170613676 | A | G | 0.001 | 0.001 | 0     |         |        |        |        |  | Rare SNP   |
| 1 | 1:170613680 | 170613680 | G | A | 0.001 | 0     | 0.001 |         |        |        |        |  | Rare SNP   |
| 1 | rs654461    | 170613850 | A | T | 0.438 | 0.479 | 0.397 | 0.3454  | 1.4126 | 0.0959 | 0.0003 |  | Common SNP |
| 1 | rs567328    | 170613869 | T | A | 0.438 | 0.479 | 0.397 | 0.3454  | 1.4126 | 0.0959 | 0.0003 |  | Common SNP |
| 1 | rs7554184   | 170613990 | A | C | 0.129 | 0.119 | 0.138 | -0.1611 | 0.8512 | 0.1358 | 0.2358 |  | Common SNP |
| 1 | 1:170614008 | 170614008 | A | T | 0.001 | 0.001 | 0     |         |        |        |        |  | Rare SNP   |
| 1 | rs544478    | 170614042 | C | T | 0.438 | 0.479 | 0.397 | 0.3454  | 1.4126 | 0.0959 | 0.0003 |  | Common SNP |
| 1 | 1:170614049 | 170614049 | C | A | 0.001 | 0.002 | 0     |         |        |        |        |  | Rare SNP   |
| 1 | 1:170614203 | 170614203 | G | T | 0.001 | 0.002 | 0     |         |        |        |        |  | Rare SNP   |
| 1 | 1:170614207 | 170614207 | A | G | 0.001 | 0     | 0.001 |         |        |        |        |  | Rare SNP   |
| 1 | rs666419    | 170614244 | T | C | 0.28  | 0.246 | 0.315 | -0.3605 | 0.6973 | 0.1075 | 0.0008 |  | Common SNP |
| 1 | 1:170614256 | 170614256 | C | T | 0.003 | 0.001 | 0.005 |         |        |        |        |  | Rare SNP   |
| 1 | rs79639631  | 170614257 | G | A | 0.129 | 0.119 | 0.138 | -0.1611 | 0.8512 | 0.1358 | 0.2358 |  | Common SNP |
| 1 | rs17615321  | 170614306 | G | A | 0.129 | 0.119 | 0.138 | -0.1611 | 0.8512 | 0.1358 | 0.2358 |  | Common SNP |
| 1 | 1:170614357 | 170614357 | T | C | 0.001 | 0.001 | 0     |         |        |        |        |  | Rare SNP   |
| 1 | 1:170614420 | 170614420 | G | A | 0.001 | 0.001 | 0.001 |         |        |        |        |  | Rare SNP   |
| 1 | 1:170614540 | 170614540 | A | G | 0.001 | 0.001 | 0     |         |        |        |        |  | Rare SNP   |
| 1 | 1:170614616 | 170614616 | A | G | 0.001 | 0     | 0.001 |         |        |        |        |  | Rare SNP   |
| 1 | 1:170614820 | 170614820 | G | A | 0.004 | 0.004 | 0.003 |         |        |        |        |  | Rare SNP   |
| 1 | 1:170614866 | 170614866 | C | T | 0.001 | 0.001 | 0     |         |        |        |        |  | Rare SNP   |
| 1 | 1:170615054 | 170615054 | A | T | 0.001 | 0.001 | 0     |         |        |        |        |  | Rare SNP   |
| 1 | 1:170615124 | 170615124 | C | T | 0.001 | 0     | 0.001 |         |        |        |        |  | Rare SNP   |
| 1 | 1:170615174 | 170615174 | G | A | 0.001 | 0     | 0.002 |         |        |        |        |  | Rare SNP   |
| 1 | 1:170615251 | 170615251 | A | C | 0.001 | 0.001 | 0     |         |        |        |        |  | Rare SNP   |
| 1 | 1:170615465 | 170615465 | G | C | 0.003 | 0.002 | 0.004 |         |        |        |        |  | Rare SNP   |
| 1 | 1:170615477 | 170615477 | G | A | 0.001 | 0     | 0.001 |         |        |        |        |  | Rare SNP   |
| 1 | rs61824886  | 170615660 | C | G | 0.136 | 0.14  | 0.132 | 0.0673  | 1.0696 | 0.1356 | 0.6198 |  | Common SNP |
| 1 | 1:170615684 | 170615684 | T | G | 0.004 | 0.006 | 0.002 |         |        |        |        |  | Rare SNP   |

|   |             |           |   |   |       |       |       |         |        |        |        |            |
|---|-------------|-----------|---|---|-------|-------|-------|---------|--------|--------|--------|------------|
| 1 | rs9426906   | 170615695 | C | T | 0.264 | 0.259 | 0.269 | -0.055  | 0.9465 | 0.1038 | 0.5961 | Common SNP |
| 1 | rs61824887  | 170615724 | A | T | 0.136 | 0.14  | 0.132 | 0.0673  | 1.0696 | 0.1356 | 0.6198 | Common SNP |
| 1 | rs12139314  | 170615737 | C | T | 0.264 | 0.259 | 0.269 | -0.055  | 0.9465 | 0.1038 | 0.5961 | Common SNP |
| 1 | rs78360678  | 170615748 | C | T | 0.002 | 0.002 | 0.001 |         |        |        |        | Rare SNP   |
| 1 | 1:170615749 | 170615749 | G | A | 0.001 | 0.001 | 0.001 |         |        |        |        | Rare SNP   |
| 1 | rs12129225  | 170615833 | T | C | 0.264 | 0.259 | 0.269 | -0.055  | 0.9465 | 0.1038 | 0.5961 | Common SNP |
| 1 | 1:170615843 | 170615843 | A | G | 0.001 | 0.001 | 0     |         |        |        |        | Rare SNP   |
| 1 | rs593173    | 170615860 | G | A | 0.281 | 0.246 | 0.317 | -0.3703 | 0.6905 | 0.1074 | 0.0006 | Common SNP |
| 1 | rs593560    | 170615917 | G | A | 0.438 | 0.479 | 0.397 | 0.3454  | 1.4126 | 0.0959 | 0.0003 | Common SNP |
| 1 | 1:170615962 | 170615962 | T | C | 0.002 | 0.003 | 0.001 |         |        |        |        | Rare SNP   |
| 1 | 1:170615980 | 170615980 | A | G | 0.001 | 0     | 0.001 |         |        |        |        | Rare SNP   |
| 1 | 1:170616026 | 170616026 | T | C | 0.001 | 0     | 0.001 |         |        |        |        | Rare SNP   |
| 1 | rs12129292  | 170616052 | T | C | 0.264 | 0.259 | 0.269 | -0.055  | 0.9465 | 0.1038 | 0.5961 | Common SNP |
| 1 | 1:170616112 | 170616112 | G | A | 0.001 | 0.001 | 0.001 |         |        |        |        | Rare SNP   |
| 1 | 1:170616115 | 170616115 | C | G | 0.002 | 0.002 | 0.001 |         |        |        |        | Rare SNP   |
| 1 | 1:170616131 | 170616131 | T | G | 0.001 | 0     | 0.001 |         |        |        |        | Rare SNP   |
| 1 | rs12131887  | 170616194 | G | T | 0.264 | 0.259 | 0.269 | -0.055  | 0.9465 | 0.1038 | 0.5961 | Common SNP |
| 1 | rs76708469  | 170616225 | A | G | 0.001 | 0.001 | 0     |         |        |        |        | Rare SNP   |
| 1 | rs12128488  | 170616311 | A | C | 0.129 | 0.119 | 0.138 | -0.1611 | 0.8512 | 0.1358 | 0.2358 | Common SNP |
| 1 | rs2988392   | 170616355 | G | C | 0.455 | 0.496 | 0.414 | 0.3373  | 1.4012 | 0.0952 | 0.0004 | Common SNP |
| 1 | 1:170616393 | 170616393 | A | G | 0.011 | 0.014 | 0.009 | 0.48    | 1.6161 | 0.4554 | 0.2917 | Common SNP |
| 1 | 1:170616465 | 170616465 | C | A | 0.001 | 0     | 0.001 |         |        |        |        | Rare SNP   |
| 1 | 1:170616719 | 170616719 | G | A | 0.001 | 0.001 | 0     |         |        |        |        | Rare SNP   |
| 1 | rs6663331   | 170616727 | A | C | 0.136 | 0.14  | 0.132 | 0.0669  | 1.0692 | 0.1356 | 0.6216 | Common SNP |
| 1 | 1:170616811 | 170616811 | G | A | 0.001 | 0     | 0.001 |         |        |        |        | Rare SNP   |
| 1 | 1:170616976 | 170616976 | C | T | 0.001 | 0.001 | 0     |         |        |        |        | Rare SNP   |
| 1 | 1:170617004 | 170617004 | C | T | 0.001 | 0.002 | 0     |         |        |        |        | Rare SNP   |
| 1 | 1:170617114 | 170617114 | A | C | 0.001 | 0.001 | 0     |         |        |        |        | Rare SNP   |
| 1 | 1:170617136 | 170617136 | A | G | 0.001 | 0     | 0.001 |         |        |        |        | Rare SNP   |
| 1 | 1:170617175 | 170617175 | A | G | 0.001 | 0.001 | 0     |         |        |        |        | Rare SNP   |
| 1 | 1:170617194 | 170617194 | T | C | 0.002 | 0.002 | 0.002 |         |        |        |        | Rare SNP   |

|   |             |           |   |   |       |       |       |         |        |        |        |            |
|---|-------------|-----------|---|---|-------|-------|-------|---------|--------|--------|--------|------------|
| 1 | rs608930    | 170617306 | G | T | 0.435 | 0.478 | 0.392 | 0.3553  | 1.4266 | 0.0956 | 0.0002 | Common SNP |
| 1 | rs619699    | 170617379 | G | A | 0.277 | 0.242 | 0.31  | -0.358  | 0.6991 | 0.1078 | 0.0009 | Common SNP |
| 1 | rs76117299  | 170617420 | A | G | 0.023 | 0.024 | 0.023 | 0.0617  | 1.0636 | 0.3135 | 0.844  | Common SNP |
| 1 | 1:170617442 | 170617442 | G | A | 0.001 | 0.001 | 0     |         |        |        |        | Rare SNP   |
| 1 | rs7521429   | 170617446 | A | G | 0.289 | 0.279 | 0.299 | -0.091  | 0.913  | 0.1021 | 0.3728 | Common SNP |
| 1 | 1:170617548 | 170617548 | A | T | 0.001 | 0.001 | 0     |         |        |        |        | Rare SNP   |
| 1 | rs7544273   | 170617732 | C | G | 0.196 | 0.214 | 0.178 | 0.2339  | 1.2635 | 0.12   | 0.0513 | Common SNP |
| 1 | 1:170617895 | 170617895 | G | A | 0.002 | 0     | 0.003 |         |        |        |        | Rare SNP   |
| 1 | 1:170618086 | 170618086 | T | C | 0.006 | 0.009 | 0.003 |         |        |        |        | Rare SNP   |
| 1 | 1:170618172 | 170618172 | T | A | 0.001 | 0.002 | 0     |         |        |        |        | Rare SNP   |
| 1 | 1:170618224 | 170618224 | C | A | 0.001 | 0     | 0.001 |         |        |        |        | Rare SNP   |
| 1 | rs10082209  | 170618239 | C | T | 0.02  | 0.019 | 0.02  | -0.0231 | 0.9772 | 0.3115 | 0.9409 | Common SNP |
| 1 | rs623752    | 170618291 | A | G | 0.431 | 0.475 | 0.387 | 0.3597  | 1.4329 | 0.095  | 0.0002 | Common SNP |
| 1 | 1:170618349 | 170618349 | A | G | 0.001 | 0.001 | 0     |         |        |        |        | Rare SNP   |
| 1 | rs531007    | 170618382 | T | G | 0.431 | 0.475 | 0.387 | 0.3597  | 1.4329 | 0.095  | 0.0002 | Common SNP |
| 1 | 1:170618410 | 170618410 | T | C | 0.001 | 0.001 | 0     |         |        |        |        | Rare SNP   |
| 1 | 1:170618431 | 170618431 | T | G | 0.001 | 0.001 | 0.001 |         |        |        |        | Rare SNP   |
| 1 | rs12038255  | 170618461 | G | A | 0.188 | 0.169 | 0.207 | -0.2549 | 0.775  | 0.121  | 0.0351 | Common SNP |
| 1 | 1:170618504 | 170618504 | T | A | 0.006 | 0.009 | 0.004 |         |        |        |        | Rare SNP   |
| 1 | 1:170618624 | 170618624 | C | A | 0.001 | 0     | 0.001 |         |        |        |        | Rare SNP   |
| 1 | 1:170618690 | 170618690 | A | G | 0.001 | 0.001 | 0.001 |         |        |        |        | Rare SNP   |
| 1 | 1:170618755 | 170618755 | A | G | 0.001 | 0.001 | 0     |         |        |        |        | Rare SNP   |
| 1 | rs35043573  | 170618759 | T | C | 0.288 | 0.28  | 0.296 | -0.0759 | 0.9269 | 0.1021 | 0.4571 | Common SNP |
| 1 | 1:170618829 | 170618829 | T | G | 0.001 | 0.001 | 0     |         |        |        |        | Rare SNP   |
| 1 | 1:170618875 | 170618875 | T | C | 0.001 | 0     | 0.001 |         |        |        |        | Rare SNP   |
| 1 | 1:170619184 | 170619184 | A | G | 0.022 | 0.026 | 0.019 | 0.3493  | 1.4181 | 0.3277 | 0.2865 | Common SNP |
| 1 | rs12131714  | 170619288 | A | T | 0.148 | 0.15  | 0.146 | 0.0375  | 1.0382 | 0.1303 | 0.7737 | Common SNP |
| 1 | rs1234282   | 170619324 | A | T | 0.277 | 0.24  | 0.313 | -0.3791 | 0.6845 | 0.1077 | 0.0004 | Common SNP |
| 1 | 1:170619468 | 170619468 | T | C | 0.001 | 0.001 | 0     |         |        |        |        | Rare SNP   |
| 1 | rs575432    | 170619607 | A | G | 0.435 | 0.478 | 0.391 | 0.3607  | 1.4343 | 0.0958 | 0.0002 | Common SNP |
| 1 | rs2901403   | 170619655 | G | C | 0.288 | 0.283 | 0.294 | -0.0556 | 0.946  | 0.1027 | 0.5885 | Common SNP |

|   |             |           |   |   |       |       |       |         |        |        |        |            |
|---|-------------|-----------|---|---|-------|-------|-------|---------|--------|--------|--------|------------|
| 1 | rs2150025   | 170620113 | G | T | 0.02  | 0.019 | 0.02  | -0.0231 | 0.9772 | 0.3115 | 0.9409 | Common SNP |
| 1 | rs9427198   | 170620129 | G | A | 0.12  | 0.11  | 0.13  | -0.1833 | 0.8325 | 0.1411 | 0.1939 | Common SNP |
| 1 | 1:170620239 | 170620239 | G | A | 0.001 | 0.001 | 0     |         |        |        |        | Rare SNP   |
| 1 | 1:170620265 | 170620265 | A | G | 0.001 | 0     | 0.001 |         |        |        |        | Rare SNP   |
| 1 | 1:170620332 | 170620332 | T | C | 0.015 | 0.011 | 0.018 | -0.5468 | 0.5788 | 0.4044 | 0.1763 | Common SNP |
| 1 | 1:170620399 | 170620399 | C | G | 0.001 | 0.001 | 0     |         |        |        |        | Rare SNP   |
| 1 | 1:170620573 | 170620573 | T | C | 0.001 | 0.001 | 0     |         |        |        |        | Rare SNP   |
| 1 | rs6658782   | 170620692 | A | T | 0.288 | 0.28  | 0.296 | -0.0759 | 0.9269 | 0.1021 | 0.4571 | Common SNP |
| 1 | 1:170620886 | 170620886 | G | A | 0.001 | 0.002 | 0     |         |        |        |        | Rare SNP   |
| 1 | 1:170621193 | 170621193 | C | T | 0.001 | 0     | 0.001 |         |        |        |        | Rare SNP   |
| 1 | 1:170621426 | 170621426 | T | A | 0.001 | 0.001 | 0     |         |        |        |        | Rare SNP   |
| 1 | 1:170621432 | 170621432 | T | A | 0.004 | 0.002 | 0.005 |         |        |        |        | Rare SNP   |
| 1 | 1:170621535 | 170621535 | T | C | 0.001 | 0     | 0.001 |         |        |        |        | Rare SNP   |
| 1 | 1:170621566 | 170621566 | A | G | 0.003 | 0.004 | 0.002 |         |        |        |        | Rare SNP   |
| 1 | 1:170621712 | 170621712 | A | G | 0.001 | 0     | 0.001 |         |        |        |        | Rare SNP   |
| 1 | 1:170621902 | 170621902 | G | A | 0.001 | 0.001 | 0     |         |        |        |        | Rare SNP   |
| 1 | 1:170622030 | 170622030 | C | T | 0.001 | 0     | 0.002 |         |        |        |        | Rare SNP   |
| 1 | 1:170622032 | 170622032 | A | G | 0.001 | 0.001 | 0     |         |        |        |        | Rare SNP   |
| 1 | 1:170622169 | 170622169 | C | T | 0.014 | 0.017 | 0.01  | 0.5807  | 1.7873 | 0.4226 | 0.1694 | Common SNP |
| 1 | 1:170622186 | 170622186 | T | C | 0.001 | 0.001 | 0     |         |        |        |        | Rare SNP   |
| 1 | 1:170622283 | 170622283 | C | A | 0.001 | 0.001 | 0     |         |        |        |        | Rare SNP   |
| 1 | 1:170622384 | 170622384 | A | G | 0.001 | 0.001 | 0     |         |        |        |        | Rare SNP   |
| 1 | 1:170622421 | 170622421 | C | T | 0.002 | 0.002 | 0.001 |         |        |        |        | Rare SNP   |
| 1 | 1:170622663 | 170622663 | G | C | 0.001 | 0     | 0.001 |         |        |        |        | Rare SNP   |
| 1 | 1:170622664 | 170622664 | T | A | 0.001 | 0.001 | 0     |         |        |        |        | Rare SNP   |
| 1 | 1:170622684 | 170622684 | T | C | 0.001 | 0     | 0.001 |         |        |        |        | Rare SNP   |
| 1 | 1:170622810 | 170622810 | T | G | 0.002 | 0.003 | 0.001 |         |        |        |        | Rare SNP   |
| 1 | rs1234284   | 170622968 | C | T | 0.295 | 0.257 | 0.332 | -0.347  | 0.7068 | 0.104  | 0.0009 | Common SNP |
| 1 | 1:170623032 | 170623032 | C | T | 0.001 | 0     | 0.001 |         |        |        |        | Rare SNP   |
| 1 | rs588837    | 170623109 | A | G | 0.437 | 0.481 | 0.393 | 0.3583  | 1.4309 | 0.0954 | 0.0002 | Common SNP |
| 1 | rs12408905  | 170623196 | G | A | 0.121 | 0.112 | 0.13  | -0.1734 | 0.8408 | 0.1409 | 0.2185 | Common SNP |



|   |             |           |   |   |       |       |       |         |        |        |        |  |            |
|---|-------------|-----------|---|---|-------|-------|-------|---------|--------|--------|--------|--|------------|
| 1 | rs79829994  | 170623425 | A | G | 0.001 | 0.001 | 0.001 |         |        |        |        |  | Rare SNP   |
| 1 | 1:170623549 | 170623549 | A | T | 0.001 | 0     | 0.001 |         |        |        |        |  | Rare SNP   |
| 1 | 1:170623568 | 170623568 | T | C | 0.001 | 0     | 0.001 |         |        |        |        |  | Rare SNP   |
| 1 | rs61639095  | 170623571 | A | G | 0.019 | 0.019 | 0.018 | 0.0753  | 1.0782 | 0.3189 | 0.8134 |  | Common SNP |
| 1 | 1:170623598 | 170623598 | C | T | 0.001 | 0     | 0.001 |         |        |        |        |  | Rare SNP   |
| 1 | 1:170623671 | 170623671 | G | A | 0.003 | 0.003 | 0.002 |         |        |        |        |  | Rare SNP   |
| 1 | 1:170623901 | 170623901 | G | T | 0.001 | 0.001 | 0     |         |        |        |        |  | Rare SNP   |
| 1 | rs12089974  | 170623920 | G | A | 0.277 | 0.24  | 0.313 | -0.3789 | 0.6846 | 0.1077 | 0.0004 |  | Common SNP |
| 1 | 1:170623968 | 170623968 | G | A | 0.002 | 0.003 | 0.001 |         |        |        |        |  | Rare SNP   |
| 1 | 1:170624381 | 170624381 | T | A | 0.001 | 0.001 | 0     |         |        |        |        |  | Rare SNP   |
| 1 | 1:170624483 | 170624483 | T | C | 0.009 | 0.005 | 0.013 |         |        |        |        |  | Rare SNP   |
| 1 | rs12132205  | 170624572 | A | G | 0.269 | 0.262 | 0.276 | -0.0702 | 0.9322 | 0.1034 | 0.4974 |  | Common SNP |
| 1 | 1:170624644 | 170624644 | G | A | 0.001 | 0     | 0.001 |         |        |        |        |  | Rare SNP   |
| 1 | 1:170624663 | 170624663 | G | A | 0.001 | 0.001 | 0     |         |        |        |        |  | Rare SNP   |
| 1 | 1:170624717 | 170624717 | A | G | 0.001 | 0     | 0.001 |         |        |        |        |  | Rare SNP   |
| 1 | rs17615674  | 170624762 | T | G | 0.147 | 0.149 | 0.146 | 0.0288  | 1.0292 | 0.1304 | 0.8251 |  | Common SNP |
| 1 | 1:170624832 | 170624832 | C | T | 0.001 | 0.001 | 0     |         |        |        |        |  | Rare SNP   |
| 1 | 1:170624836 | 170624836 | A | G | 0.001 | 0.001 | 0     |         |        |        |        |  | Rare SNP   |
| 1 | 1:170625021 | 170625021 | T | C | 0.001 | 0.001 | 0     |         |        |        |        |  | Rare SNP   |
| 1 | 1:170625073 | 170625073 | G | A | 0.001 | 0.001 | 0     |         |        |        |        |  | Rare SNP   |
| 1 | 1:170625088 | 170625088 | T | C | 0.001 | 0.001 | 0     |         |        |        |        |  | Rare SNP   |
| 1 | 1:170625192 | 170625192 | T | C | 0.001 | 0.001 | 0     |         |        |        |        |  | Rare SNP   |
| 1 | 1:170625348 | 170625348 | C | T | 0.006 | 0.005 | 0.006 |         |        |        |        |  | Rare SNP   |
| 1 | 1:170625361 | 170625361 | A | T | 0.001 | 0.001 | 0     |         |        |        |        |  | Rare SNP   |
| 1 | 1:170625455 | 170625455 | C | T | 0.001 | 0     | 0.001 |         |        |        |        |  | Rare SNP   |
| 1 | rs501680    | 170625867 | T | C | 0.276 | 0.24  | 0.311 | -0.3729 | 0.6887 | 0.1076 | 0.0005 |  | Common SNP |
| 1 | 1:170625873 | 170625873 | A | G | 0.002 | 0.002 | 0.002 |         |        |        |        |  | Rare SNP   |
| 1 | rs75214420  | 170625890 | A | G | 0.001 | 0.001 | 0     |         |        |        |        |  | Rare SNP   |
| 1 | 1:170625989 | 170625989 | G | A | 0.001 | 0.001 | 0     |         |        |        |        |  | Rare SNP   |
| 1 | 1:170626235 | 170626235 | A | T | 0.001 | 0     | 0.001 |         |        |        |        |  | Rare SNP   |
| 1 | 1:170626242 | 170626242 | A | C | 0.001 | 0.001 | 0     |         |        |        |        |  | Rare SNP   |

|   |             |           |   |   |       |       |       |         |        |        |        |  |            |
|---|-------------|-----------|---|---|-------|-------|-------|---------|--------|--------|--------|--|------------|
| 1 | 1:170626255 | 170626255 | G | A | 0.003 | 0.004 | 0.002 |         |        |        |        |  | Rare SNP   |
| 1 | 1:170626276 | 170626276 | C | T | 0.001 | 0.001 | 0     |         |        |        |        |  | Rare SNP   |
| 1 | rs6667967   | 170626447 | T | G | 0.121 | 0.112 | 0.13  | -0.1709 | 0.8429 | 0.1402 | 0.2229 |  | Common SNP |
| 1 | rs6667985   | 170626520 | T | C | 0.121 | 0.112 | 0.13  | -0.1709 | 0.8429 | 0.1402 | 0.2229 |  | Common SNP |
| 1 | 1:170626559 | 170626559 | A | T | 0.001 | 0.001 | 0     |         |        |        |        |  | Rare SNP   |
| 1 | rs77064177  | 170626601 | G | T | 0.001 | 0     | 0.001 |         |        |        |        |  | Rare SNP   |
| 1 | rs663887    | 170626953 | G | A | 0.276 | 0.239 | 0.313 | -0.3828 | 0.6819 | 0.1074 | 0.0004 |  | Common SNP |
| 1 | 1:170627049 | 170627049 | T | C | 0.001 | 0     | 0.001 |         |        |        |        |  | Rare SNP   |
| 1 | 1:170627057 | 170627057 | C | T | 0.001 | 0     | 0.001 |         |        |        |        |  | Rare SNP   |
| 1 | 1:170627065 | 170627065 | C | T | 0.001 | 0     | 0.001 |         |        |        |        |  | Rare SNP   |
| 1 | 1:170627096 | 170627096 | A | G | 0.005 | 0.005 | 0.005 |         |        |        |        |  | Rare SNP   |
| 1 | 1:170627132 | 170627132 | G | A | 0.001 | 0     | 0.002 |         |        |        |        |  | Rare SNP   |
| 1 | rs61817372  | 170627172 | A | G | 0.147 | 0.149 | 0.146 | 0.0288  | 1.0292 | 0.1304 | 0.8251 |  | Common SNP |
| 1 | 1:170627292 | 170627292 | A | G | 0.001 | 0.001 | 0     |         |        |        |        |  | Rare SNP   |
| 1 | 1:170627293 | 170627293 | A | T | 0.001 | 0     | 0.001 |         |        |        |        |  | Rare SNP   |
| 1 | 1:170627423 | 170627423 | T | G | 0.001 | 0     | 0.001 |         |        |        |        |  | Rare SNP   |
| 1 | rs78962619  | 170627559 | G | A | 0.019 | 0.019 | 0.019 | 0.0252  | 1.0256 | 0.315  | 0.9361 |  | Common SNP |
| 1 | rs78849006  | 170627601 | C | T | 0.001 | 0.001 | 0     |         |        |        |        |  | Rare SNP   |
| 1 | 1:170627617 | 170627617 | T | C | 0.001 | 0     | 0.001 |         |        |        |        |  | Rare SNP   |
| 1 | 1:170627638 | 170627638 | G | A | 0.001 | 0     | 0.002 |         |        |        |        |  | Rare SNP   |
| 1 | 1:170627642 | 170627642 | T | C | 0.001 | 0.001 | 0.001 |         |        |        |        |  | Rare SNP   |
| 1 | 1:170627789 | 170627789 | C | G | 0.002 | 0.002 | 0.002 |         |        |        |        |  | Rare SNP   |
| 1 | 1:170628096 | 170628096 | C | A | 0.001 | 0     | 0.001 |         |        |        |        |  | Rare SNP   |
| 1 | 1:170628097 | 170628097 | C | T | 0.01  | 0.008 | 0.013 | -0.5202 | 0.5944 | 0.4812 | 0.2798 |  | Common SNP |
| 1 | rs680084    | 170628255 | G | A | 0.455 | 0.5   | 0.41  | 0.3645  | 1.4398 | 0.0942 | 0.0001 |  | Common SNP |
| 1 | rs583006    | 170628388 | A | G | 0.253 | 0.215 | 0.29  | -0.4094 | 0.664  | 0.1103 | 0.0002 |  | Common SNP |
| 1 | rs76459208  | 170628427 | G | A | 0.002 | 0     | 0.003 |         |        |        |        |  | Rare SNP   |
| 1 | rs524877    | 170628435 | G | C | 0.277 | 0.239 | 0.315 | -0.3925 | 0.6754 | 0.1073 | 0.0003 |  | Common SNP |
| 1 | 1:170628553 | 170628553 | C | T | 0.001 | 0.001 | 0     |         |        |        |        |  | Rare SNP   |
| 1 | 1:170628813 | 170628813 | T | C | 0.001 | 0     | 0.001 |         |        |        |        |  | Rare SNP   |
| 1 | 1:170628870 | 170628870 | A | G | 0.007 | 0.005 | 0.009 |         |        |        |        |  | Rare SNP   |

|   |             |           |   |   |       |       |       |         |        |        |        |  |            |
|---|-------------|-----------|---|---|-------|-------|-------|---------|--------|--------|--------|--|------------|
| 1 | 1:170628904 | 170628904 | C | T | 0.001 | 0.001 | 0     |         |        |        |        |  | Rare SNP   |
| 1 | 1:170629127 | 170629127 | G | T | 0.001 | 0     | 0.001 |         |        |        |        |  | Rare SNP   |
| 1 | 1:170629184 | 170629184 | A | G | 0.001 | 0.001 | 0     |         |        |        |        |  | Rare SNP   |
| 1 | 1:170629303 | 170629303 | T | C | 0.011 | 0.01  | 0.013 | -0.2844 | 0.7525 | 0.4282 | 0.5066 |  | Common SNP |
| 1 | 1:170629460 | 170629460 | G | C | 0.001 | 0.001 | 0     |         |        |        |        |  | Rare SNP   |
| 1 | 1:170629489 | 170629489 | T | G | 0.001 | 0.001 | 0     |         |        |        |        |  | Rare SNP   |
| 1 | 1:170629576 | 170629576 | C | T | 0.002 | 0.003 | 0.001 |         |        |        |        |  | Rare SNP   |
| 1 | 1:170629578 | 170629578 | C | T | 0.001 | 0.001 | 0     |         |        |        |        |  | Rare SNP   |
| 1 | 1:170629588 | 170629588 | G | T | 0.001 | 0.001 | 0     |         |        |        |        |  | Rare SNP   |
| 1 | 1:170629593 | 170629593 | G | A | 0.002 | 0.002 | 0.001 |         |        |        |        |  | Rare SNP   |
| 1 | 1:170629606 | 170629606 | A | G | 0.002 | 0.001 | 0.002 |         |        |        |        |  | Rare SNP   |
| 1 | 1:170629789 | 170629789 | G | A | 0.001 | 0.001 | 0     |         |        |        |        |  | Rare SNP   |
| 1 | 1:170629934 | 170629934 | T | C | 0.036 | 0.037 | 0.036 | 0.028   | 1.0284 | 0.2509 | 0.9112 |  | Common SNP |
| 1 | 1:170630189 | 170630189 | C | T | 0.001 | 0     | 0.001 |         |        |        |        |  | Rare SNP   |
| 1 | rs601938    | 170630259 | G | T | 0.277 | 0.239 | 0.315 | -0.3925 | 0.6754 | 0.1073 | 0.0003 |  | Common SNP |
| 1 | 1:170630411 | 170630411 | A | G | 0.001 | 0     | 0.001 |         |        |        |        |  | Rare SNP   |
| 1 | 1:170630428 | 170630428 | G | T | 0.001 | 0     | 0.001 |         |        |        |        |  | Rare SNP   |
| 1 | 1:170630474 | 170630474 | C | T | 0.001 | 0     | 0.001 |         |        |        |        |  | Rare SNP   |
| 1 | 1:170630544 | 170630544 | G | A | 0.001 | 0     | 0.001 |         |        |        |        |  | Rare SNP   |
| 1 | rs77884741  | 170630662 | C | G | 0.002 | 0.002 | 0.001 |         |        |        |        |  | Rare SNP   |
| 1 | 1:170630744 | 170630744 | G | A | 0.001 | 0     | 0.001 |         |        |        |        |  | Rare SNP   |
| 1 | 1:170630789 | 170630789 | G | A | 0.001 | 0     | 0.001 |         |        |        |        |  | Rare SNP   |
| 1 | 1:170631008 | 170631008 | T | A | 0.019 | 0.019 | 0.019 | 0.0252  | 1.0256 | 0.315  | 0.9361 |  | Common SNP |
| 1 | 1:170631010 | 170631010 | C | T | 0.003 | 0.005 | 0.001 |         |        |        |        |  | Rare SNP   |
| 1 | 1:170631030 | 170631030 | T | C | 0.002 | 0.002 | 0.001 |         |        |        |        |  | Rare SNP   |
| 1 | 1:170631136 | 170631136 | G | A | 0.001 | 0.001 | 0     |         |        |        |        |  | Rare SNP   |
| 1 | 1:170631178 | 170631178 | A | G | 0.001 | 0.001 | 0.001 |         |        |        |        |  | Rare SNP   |
| 1 | 1:170631243 | 170631243 | T | C | 0.028 | 0.03  | 0.026 | 0.1678  | 1.1827 | 0.2874 | 0.5593 |  | Common SNP |
| 1 | 1:170631367 | 170631367 | A | C | 0.001 | 0.001 | 0     |         |        |        |        |  | Rare SNP   |
| 1 | rs627848    | 170631420 | G | A | 0.274 | 0.237 | 0.31  | -0.3866 | 0.6794 | 0.108  | 0.0003 |  | Common SNP |
| 1 | rs78076188  | 170631479 | A | G | 0.001 | 0.002 | 0     |         |        |        |        |  | Rare SNP   |

|   |             |           |   |   |       |       |       |         |        |        |        |            |
|---|-------------|-----------|---|---|-------|-------|-------|---------|--------|--------|--------|------------|
| 1 | rs629234    | 170631763 | T | C | 0.455 | 0.499 | 0.41  | 0.3681  | 1.445  | 0.0941 | 0.0001 | Common SNP |
| 1 | 1:170631939 | 170631939 | G | A | 0.001 | 0     | 0.001 |         |        |        |        | Rare SNP   |
| 1 | 1:170631941 | 170631941 | T | C | 0.001 | 0.001 | 0     |         |        |        |        | Rare SNP   |
| 1 | 1:170631990 | 170631990 | G | T | 0.002 | 0.002 | 0.001 |         |        |        |        | Rare SNP   |
| 1 | rs74123149  | 170632093 | G | C | 0.019 | 0.019 | 0.019 | 0.0252  | 1.0256 | 0.315  | 0.9361 | Common SNP |
| 1 | 1:170632329 | 170632329 | G | A | 0.001 | 0.001 | 0     |         |        |        |        | Rare SNP   |
| 1 | rs56250774  | 170632384 | A | G | 0.199 | 0.218 | 0.181 | 0.2344  | 1.2642 | 0.1201 | 0.051  | Common SNP |
| 1 | 1:170632413 | 170632413 | C | G | 0.001 | 0.001 | 0.001 |         |        |        |        | Rare SNP   |
| 1 | 1:170632547 | 170632547 | C | T | 0.001 | 0.001 | 0     |         |        |        |        | Rare SNP   |
| 1 | 1:170632681 | 170632681 | C | T | 0.001 | 0     | 0.001 |         |        |        |        | Rare SNP   |
| 1 | 1:170632683 | 170632683 | G | A | 0.001 | 0.001 | 0     |         |        |        |        | Rare SNP   |
| 1 | rs12121907  | 170632808 | C | T | 0.149 | 0.152 | 0.147 | 0.0354  | 1.0361 | 0.1302 | 0.7854 | Common SNP |
| 1 | rs73032785  | 170632839 | G | A | 0.003 | 0.002 | 0.003 |         |        |        |        | Rare SNP   |
| 1 | 1:170632939 | 170632939 | G | A | 0.001 | 0     | 0.001 |         |        |        |        | Rare SNP   |
| 1 | rs73032787  | 170632965 | G | A | 0.123 | 0.113 | 0.134 | -0.1868 | 0.8296 | 0.139  | 0.1789 | Common SNP |
| 1 | 1:170632970 | 170632970 | T | C | 0.001 | 0.001 | 0     |         |        |        |        | Rare SNP   |
| 1 | 1:170633016 | 170633016 | T | G | 0.001 | 0.001 | 0     |         |        |        |        | Rare SNP   |
| 1 | 1:170633060 | 170633060 | A | G | 0.001 | 0.001 | 0     |         |        |        |        | Rare SNP   |
| 1 | 1:170633077 | 170633077 | C | T | 0.002 | 0.002 | 0.001 |         |        |        |        | Rare SNP   |
| 1 | 1:170633162 | 170633162 | G | A | 0.002 | 0.002 | 0.001 |         |        |        |        | Rare SNP   |
| 1 | 1:170633166 | 170633166 | G | A | 0.001 | 0.001 | 0     |         |        |        |        | Rare SNP   |
| 1 | 1:170633288 | 170633288 | C | G | 0.001 | 0.001 | 0     |         |        |        |        | Rare SNP   |
| 1 | rs77911930  | 170633322 | C | T | 0.002 | 0.002 | 0.002 |         |        |        |        | Rare SNP   |
| 1 | rs79715821  | 170633347 | G | C | 0.001 | 0.001 | 0     |         |        |        |        | Rare SNP   |
| 1 | 1:170633434 | 170633434 | C | T | 0.001 | 0.001 | 0     |         |        |        |        | Rare SNP   |
| 1 | rs74674242  | 170633544 | G | A | 0.001 | 0     | 0.002 |         |        |        |        | Rare SNP   |
| 1 | 1:170633569 | 170633569 | C | T | 0.002 | 0.001 | 0.002 |         |        |        |        | Rare SNP   |
| 1 | 1:170633688 | 170633688 | A | G | 0.005 | 0.004 | 0.005 |         |        |        |        | Rare SNP   |
| 1 | 1:170633711 | 170633711 | G | A | 0.002 | 0.001 | 0.002 |         |        |        |        | Rare SNP   |
| 1 | 1:170633839 | 170633839 | G | A | 0.001 | 0     | 0.001 |         |        |        |        | Rare SNP   |
| 1 | 1:170633842 | 170633842 | G | C | 0.001 | 0     | 0.001 |         |        |        |        | Rare SNP   |

|   |             |           |   |   |       |       |       |         |        |        |        |            |
|---|-------------|-----------|---|---|-------|-------|-------|---------|--------|--------|--------|------------|
| 1 | rs659580    | 170633896 | T | C | 0.232 | 0.258 | 0.206 | 0.3025  | 1.3532 | 0.1122 | 0.007  | Common SNP |
| 1 | 1:170633908 | 170633908 | C | G | 0.001 | 0.001 | 0     |         |        |        |        | Rare SNP   |
| 1 | 1:170633960 | 170633960 | G | A | 0.001 | 0     | 0.001 |         |        |        |        | Rare SNP   |
| 1 | rs13374413  | 170634047 | C | A | 0.019 | 0.018 | 0.019 | -0.0245 | 0.9758 | 0.3187 | 0.9388 | Common SNP |
| 1 | 1:170634122 | 170634122 | G | T | 0.001 | 0.001 | 0     |         |        |        |        | Rare SNP   |
| 1 | 1:170634140 | 170634140 | G | T | 0.001 | 0     | 0.001 |         |        |        |        | Rare SNP   |
| 1 | rs57040325  | 170634144 | C | G | 0.151 | 0.154 | 0.148 | 0.0435  | 1.0444 | 0.1293 | 0.7366 | Common SNP |
| 1 | 1:170634396 | 170634396 | C | T | 0.001 | 0     | 0.001 |         |        |        |        | Rare SNP   |
| 1 | rs72705052  | 170634487 | C | T | 0.067 | 0.057 | 0.077 | -0.3211 | 0.7254 | 0.1905 | 0.0918 | Common SNP |
| 1 | 1:170634511 | 170634511 | C | A | 0.001 | 0.001 | 0     |         |        |        |        | Rare SNP   |
| 1 | 1:170634562 | 170634562 | T | C | 0.001 | 0     | 0.001 |         |        |        |        | Rare SNP   |
| 1 | 1:170634563 | 170634563 | C | T | 0.001 | 0.001 | 0.001 |         |        |        |        | Rare SNP   |
| 1 | 1:170634698 | 170634698 | C | G | 0.001 | 0.001 | 0.001 |         |        |        |        | Rare SNP   |
| 1 | 1:170634833 | 170634833 | G | A | 0.001 | 0.001 | 0     |         |        |        |        | Rare SNP   |
| 1 | 1:170634859 | 170634859 | C | T | 0.001 | 0.001 | 0.001 |         |        |        |        | Rare SNP   |
| 1 | rs77401317  | 170634895 | T | A | 0.12  | 0.11  | 0.129 | -0.1737 | 0.8405 | 0.1413 | 0.219  | Common SNP |
| 1 | 1:170634931 | 170634931 | C | T | 0.003 | 0.003 | 0.002 |         |        |        |        | Rare SNP   |
| 1 | rs525489    | 170635002 | T | G | 0.431 | 0.475 | 0.388 | 0.3577  | 1.43   | 0.0953 | 0.0002 | Common SNP |
| 1 | 1:170635111 | 170635111 | A | C | 0.001 | 0.001 | 0.001 |         |        |        |        | Rare SNP   |
| 1 | 1:170635273 | 170635273 | A | G | 0.001 | 0     | 0.001 |         |        |        |        | Rare SNP   |
| 1 | 1:170635327 | 170635327 | C | A | 0.001 | 0     | 0.002 |         |        |        |        | Rare SNP   |
| 1 | rs12118712  | 170635357 | C | A | 0.02  | 0.016 | 0.024 | -0.3843 | 0.6809 | 0.3336 | 0.2494 | Common SNP |
| 1 | rs501005    | 170635369 | A | G | 0.464 | 0.499 | 0.429 | 0.2867  | 1.332  | 0.0949 | 0.0025 | Common SNP |
| 1 | 1:170635426 | 170635426 | C | G | 0.001 | 0.001 | 0     |         |        |        |        | Rare SNP   |
| 1 | 1:170635452 | 170635452 | A | G | 0.001 | 0     | 0.002 |         |        |        |        | Rare SNP   |
| 1 | 1:170635595 | 170635595 | C | T | 0.005 | 0.004 | 0.005 |         |        |        |        | Rare SNP   |
| 1 | 1:170635699 | 170635699 | G | A | 0.001 | 0     | 0.001 |         |        |        |        | Rare SNP   |
| 1 | 1:170635991 | 170635991 | G | T | 0.001 | 0     | 0.001 |         |        |        |        | Rare SNP   |
| 1 | rs473133    | 170636079 | A | T | 0.434 | 0.477 | 0.39  | 0.3582  | 1.4308 | 0.0954 | 0.0002 | Common SNP |
| 1 | 1:170636173 | 170636173 | G | A | 0.001 | 0     | 0.001 |         |        |        |        | Rare SNP   |
| 1 | rs4656219   | 170636355 | G | C | 0.12  | 0.11  | 0.129 | -0.1737 | 0.8405 | 0.1413 | 0.219  | Common SNP |

|   |             |           |   |   |       |       |       |         |        |        |          |  |            |
|---|-------------|-----------|---|---|-------|-------|-------|---------|--------|--------|----------|--|------------|
| 1 | 1:170636596 | 170636596 | C | T | 0.001 | 0.001 | 0.001 |         |        |        |          |  | Rare SNP   |
| 1 | 1:170636826 | 170636826 | C | T | 0.001 | 0.001 | 0.001 |         |        |        |          |  | Rare SNP   |
| 1 | rs1540322   | 170636982 | A | G | 0.149 | 0.154 | 0.144 | 0.0701  | 1.0726 | 0.1301 | 0.5899   |  | Common SNP |
| 1 | 1:170636991 | 170636991 | A | G | 0.001 | 0.001 | 0     |         |        |        |          |  | Rare SNP   |
| 1 | rs7532461   | 170637019 | G | C | 0.122 | 0.112 | 0.133 | -0.1898 | 0.8271 | 0.14   | 0.1751   |  | Common SNP |
| 1 | 1:170637089 | 170637089 | A | C | 0.023 | 0.024 | 0.022 | 0.1185  | 1.1258 | 0.3167 | 0.7083   |  | Common SNP |
| 1 | 1:170637092 | 170637092 | G | A | 0.001 | 0     | 0.001 |         |        |        |          |  | Rare SNP   |
| 1 | 1:170637107 | 170637107 | A | T | 0.001 | 0     | 0.001 |         |        |        |          |  | Rare SNP   |
| 1 | 1:170637150 | 170637150 | C | A | 0.001 | 0.001 | 0     |         |        |        |          |  | Rare SNP   |
| 1 | rs73032802  | 170637306 | G | A | 0.003 | 0.002 | 0.003 |         |        |        |          |  | Rare SNP   |
| 1 | 1:170637416 | 170637416 | A | C | 0.005 | 0.008 | 0.003 |         |        |        |          |  | Rare SNP   |
| 1 | rs73034963  | 170637481 | C | T | 0.002 | 0.002 | 0.002 |         |        |        |          |  | Rare SNP   |
| 1 | 1:170637534 | 170637534 | T | A | 0.001 | 0     | 0.001 |         |        |        |          |  | Rare SNP   |
| 1 | 1:170637589 | 170637589 | G | A | 0.001 | 0     | 0.001 |         |        |        |          |  | Rare SNP   |
| 1 | 1:170637600 | 170637600 | C | T | 0.001 | 0.001 | 0     |         |        |        |          |  | Rare SNP   |
| 1 | 1:170637656 | 170637656 | C | T | 0.001 | 0     | 0.001 |         |        |        |          |  | Rare SNP   |
| 1 | 1:170637876 | 170637876 | T | C | 0.001 | 0     | 0.001 |         |        |        |          |  | Rare SNP   |
| 1 | 1:170637907 | 170637907 | C | T | 0.001 | 0     | 0.001 |         |        |        |          |  | Rare SNP   |
| 1 | 1:170637914 | 170637914 | A | G | 0.001 | 0.001 | 0     |         |        |        |          |  | Rare SNP   |
| 1 | rs61130317  | 170637950 | C | G | 0.149 | 0.154 | 0.144 | 0.0701  | 1.0726 | 0.1301 | 0.5899   |  | Common SNP |
| 1 | rs75966482  | 170637985 | C | G | 0.001 | 0.002 | 0     |         |        |        |          |  | Rare SNP   |
| 1 | rs61817377  | 170638251 | G | A | 0.002 | 0.002 | 0.001 |         |        |        |          |  | Rare SNP   |
| 1 | 1:170638281 | 170638281 | T | C | 0.001 | 0     | 0.001 |         |        |        |          |  | Rare SNP   |
| 1 | rs73034965  | 170638289 | T | C | 0.124 | 0.113 | 0.135 | -0.1962 | 0.8218 | 0.139  | 0.1579   |  | Common SNP |
| 1 | rs520525    | 170638333 | A | G | 0.275 | 0.239 | 0.311 | -0.3778 | 0.6854 | 0.1076 | 0.0004   |  | Common SNP |
| 1 | 1:170638372 | 170638372 | A | T | 0.001 | 0     | 0.001 |         |        |        |          |  | Rare SNP   |
| 1 | 1:170638390 | 170638390 | A | T | 0.001 | 0     | 0.001 |         |        |        |          |  | Rare SNP   |
| 1 | rs78894138  | 170638525 | A | G | 0.001 | 0.001 | 0     |         |        |        |          |  | Rare SNP   |
| 1 | rs10919449  | 170638658 | C | A | 0.417 | 0.369 | 0.464 | -0.3896 | 0.6773 | 0.0954 | 4.45E-05 |  | Common SNP |
| 1 | 1:170638670 | 170638670 | G | A | 0.001 | 0     | 0.001 |         |        |        |          |  | Rare SNP   |
| 1 | 1:170638683 | 170638683 | T | C | 0.001 | 0     | 0.001 |         |        |        |          |  | Rare SNP   |

|   |             |           |   |   |       |       |       |         |        |        |        |  |            |
|---|-------------|-----------|---|---|-------|-------|-------|---------|--------|--------|--------|--|------------|
| 1 | 1:170638774 | 170638774 | C | T | 0.001 | 0.001 | 0.001 |         |        |        |        |  | Rare SNP   |
| 1 | 1:170638876 | 170638876 | C | A | 0.001 | 0.001 | 0     |         |        |        |        |  | Rare SNP   |
| 1 | 1:170638882 | 170638882 | T | C | 0.001 | 0.001 | 0     |         |        |        |        |  | Rare SNP   |
| 1 | 1:170638937 | 170638937 | C | T | 0.001 | 0     | 0.001 |         |        |        |        |  | Rare SNP   |
| 1 | 1:170638965 | 170638965 | A | G | 0.001 | 0.001 | 0     |         |        |        |        |  | Rare SNP   |
| 1 | 1:170639034 | 170639034 | T | G | 0.001 | 0.001 | 0     |         |        |        |        |  | Rare SNP   |
| 1 | rs9426907   | 170639085 | G | C | 0.122 | 0.113 | 0.132 | -0.1701 | 0.8436 | 0.1399 | 0.2238 |  | Common SNP |
| 1 | rs77115195  | 170639219 | C | T | 0.018 | 0.017 | 0.019 | -0.078  | 0.925  | 0.323  | 0.8092 |  | Common SNP |
| 1 | 1:170639284 | 170639284 | T | C | 0.001 | 0.001 | 0     |         |        |        |        |  | Rare SNP   |
| 1 | 1:170639318 | 170639318 | G | T | 0.007 | 0.008 | 0.006 |         |        |        |        |  | Rare SNP   |
| 1 | 1:170639335 | 170639335 | T | C | 0.001 | 0     | 0.002 |         |        |        |        |  | Rare SNP   |
| 1 | 1:170639365 | 170639365 | T | C | 0.005 | 0.006 | 0.004 |         |        |        |        |  | Rare SNP   |
| 1 | 1:170639623 | 170639623 | G | T | 0.001 | 0.001 | 0     |         |        |        |        |  | Rare SNP   |
| 1 | 1:170639694 | 170639694 | T | G | 0.001 | 0     | 0.001 |         |        |        |        |  | Rare SNP   |
| 1 | 1:170639698 | 170639698 | T | C | 0.001 | 0.002 | 0     |         |        |        |        |  | Rare SNP   |
| 1 | 1:170639733 | 170639733 | C | T | 0.001 | 0.001 | 0     |         |        |        |        |  | Rare SNP   |
| 1 | 1:170639864 | 170639864 | C | T | 0.001 | 0     | 0.002 |         |        |        |        |  | Rare SNP   |
| 1 | 1:170640028 | 170640028 | G | A | 0.001 | 0.001 | 0     |         |        |        |        |  | Rare SNP   |
| 1 | 1:170640199 | 170640199 | G | T | 0.001 | 0     | 0.001 |         |        |        |        |  | Rare SNP   |
| 1 | 1:170640297 | 170640297 | C | A | 0.001 | 0.001 | 0     |         |        |        |        |  | Rare SNP   |
| 1 | 1:170640397 | 170640397 | G | C | 0.001 | 0     | 0.002 |         |        |        |        |  | Rare SNP   |
| 1 | 1:170640441 | 170640441 | A | G | 0.001 | 0     | 0.001 |         |        |        |        |  | Rare SNP   |
| 1 | 1:170640471 | 170640471 | G | T | 0.001 | 0     | 0.001 |         |        |        |        |  | Rare SNP   |
| 1 | 1:170640531 | 170640531 | C | T | 0.004 | 0.004 | 0.004 |         |        |        |        |  | Rare SNP   |
| 1 | rs73034968  | 170640624 | G | C | 0.002 | 0.002 | 0.002 |         |        |        |        |  | Rare SNP   |
| 1 | 1:170640647 | 170640647 | C | T | 0.001 | 0     | 0.001 |         |        |        |        |  | Rare SNP   |
| 1 | 1:170640693 | 170640693 | C | T | 0.001 | 0     | 0.001 |         |        |        |        |  | Rare SNP   |
| 1 | 1:170640790 | 170640790 | A | G | 0.001 | 0     | 0.001 |         |        |        |        |  | Rare SNP   |
| 1 | 1:170641165 | 170641165 | T | A | 0.005 | 0.003 | 0.006 |         |        |        |        |  | Rare SNP   |
| 1 | 1:170641185 | 170641185 | T | C | 0.001 | 0.001 | 0     |         |        |        |        |  | Rare SNP   |
| 1 | 1:170641260 | 170641260 | A | G | 0.001 | 0.001 | 0     |         |        |        |        |  | Rare SNP   |

|   |             |           |   |   |       |       |       |         |        |        |        |  |            |
|---|-------------|-----------|---|---|-------|-------|-------|---------|--------|--------|--------|--|------------|
| 1 | rs76643078  | 170641472 | T | C | 0.001 | 0.001 | 0     |         |        |        |        |  | Rare SNP   |
| 1 | 1:170641483 | 170641483 | T | G | 0.001 | 0.001 | 0     |         |        |        |        |  | Rare SNP   |
| 1 | 1:170641568 | 170641568 | C | G | 0.001 | 0     | 0.001 |         |        |        |        |  | Rare SNP   |
| 1 | 1:170641625 | 170641625 | A | G | 0.001 | 0.001 | 0     |         |        |        |        |  | Rare SNP   |
| 1 | 1:170641727 | 170641727 | C | T | 0.001 | 0     | 0.001 |         |        |        |        |  | Rare SNP   |
| 1 | rs78710246  | 170641733 | A | T | 0.07  | 0.06  | 0.08  | -0.3041 | 0.7378 | 0.1813 | 0.0935 |  | Common SNP |
| 1 | rs502612    | 170641803 | T | C | 0.489 | 0.482 | 0.46  | 0.2329  | 1.2623 | 0.0936 | 0.0128 |  | Common SNP |
| 1 | 1:170641969 | 170641969 | A | T | 0.002 | 0.003 | 0     |         |        |        |        |  | Rare SNP   |
| 1 | rs79334762  | 170641996 | G | C | 0.127 | 0.12  | 0.134 | -0.1188 | 0.888  | 0.138  | 0.3893 |  | Common SNP |
| 1 | 1:170642155 | 170642155 | G | A | 0.001 | 0     | 0.001 |         |        |        |        |  | Rare SNP   |
| 1 | 1:170642175 | 170642175 | A | G | 0.001 | 0.001 | 0     |         |        |        |        |  | Rare SNP   |
| 1 | 1:170642496 | 170642496 | T | C | 0.001 | 0.001 | 0     |         |        |        |        |  | Rare SNP   |
| 1 | rs591715    | 170642509 | G | A | 0.198 | 0.168 | 0.227 | -0.3857 | 0.68   | 0.1199 | 0.0013 |  | Common SNP |
| 1 | 1:170642798 | 170642798 | C | G | 0.001 | 0     | 0.001 |         |        |        |        |  | Rare SNP   |
| 1 | 1:170642895 | 170642895 | G | C | 0.001 | 0     | 0.001 |         |        |        |        |  | Rare SNP   |
| 1 | rs593479    | 170642899 | T | C | 0.489 | 0.476 | 0.455 | 0.2723  | 1.313  | 0.093  | 0.0034 |  | Common SNP |
| 1 | 1:170642956 | 170642956 | C | A | 0.003 | 0.002 | 0.003 |         |        |        |        |  | Rare SNP   |
| 1 | 1:170642987 | 170642987 | A | G | 0.006 | 0.005 | 0.008 |         |        |        |        |  | Rare SNP   |
| 1 | rs6693796   | 170643278 | T | C | 0.018 | 0.017 | 0.018 | -0.0293 | 0.9711 | 0.3263 | 0.9284 |  | Common SNP |
| 1 | rs12024275  | 170643365 | G | A | 0.193 | 0.166 | 0.22  | -0.3608 | 0.6971 | 0.1213 | 0.0029 |  | Common SNP |
| 1 | 1:170643558 | 170643558 | C | T | 0.002 | 0.003 | 0     |         |        |        |        |  | Rare SNP   |
| 1 | 1:170643591 | 170643591 | C | T | 0.001 | 0.001 | 0     |         |        |        |        |  | Rare SNP   |
| 1 | 1:170643599 | 170643599 | C | T | 0.001 | 0.001 | 0     |         |        |        |        |  | Rare SNP   |
| 1 | 1:170643755 | 170643755 | G | A | 0.001 | 0.002 | 0     |         |        |        |        |  | Rare SNP   |
| 1 | 1:170643931 | 170643931 | G | A | 0.001 | 0.002 | 0     |         |        |        |        |  | Rare SNP   |
| 1 | 1:170643999 | 170643999 | C | A | 0.003 | 0.004 | 0.002 |         |        |        |        |  | Rare SNP   |
| 1 | 1:170644142 | 170644142 | C | A | 0.01  | 0.006 | 0.014 | -0.7821 | 0.4574 | 0.4994 | 0.1173 |  | Common SNP |
| 1 | 1:170644143 | 170644143 | C | A | 0.001 | 0.001 | 0     |         |        |        |        |  | Rare SNP   |
| 1 | 1:170644432 | 170644432 | C | T | 0.001 | 0     | 0.001 |         |        |        |        |  | Rare SNP   |
| 1 | 1:170644447 | 170644447 | A | G | 0.001 | 0.001 | 0     |         |        |        |        |  | Rare SNP   |
| 1 | 1:170644453 | 170644453 | T | G | 0.001 | 0.001 | 0     |         |        |        |        |  | Rare SNP   |



|   |             |           |   |   |       |       |       |        |        |        |        |  |            |
|---|-------------|-----------|---|---|-------|-------|-------|--------|--------|--------|--------|--|------------|
| 1 | 1:170644477 | 170644477 | G | C | 0.001 | 0     | 0.001 |        |        |        |        |  | Rare SNP   |
| 1 | rs61817379  | 170644498 | A | G | 0.326 | 0.333 | 0.318 | 0.0709 | 1.0735 | 0.1012 | 0.4832 |  | Common SNP |
| 1 | rs78910453  | 170644589 | G | T | 0.008 | 0.005 | 0.011 |        |        |        |        |  | Rare SNP   |
| 1 | 1:170644690 | 170644690 | A | G | 0.001 | 0.001 | 0     |        |        |        |        |  | Rare SNP   |
| 1 | 1:170644698 | 170644698 | G | A | 0.003 | 0     | 0.006 |        |        |        |        |  | Rare SNP   |
| 1 | rs76168995  | 170644776 | G | A | 0.001 | 0     | 0.002 |        |        |        |        |  | Rare SNP   |
| 1 | 1:170644801 | 170644801 | C | T | 0.001 | 0.001 | 0     |        |        |        |        |  | Rare SNP   |
| 1 | 1:170644853 | 170644853 | T | C | 0.001 | 0.001 | 0     |        |        |        |        |  | Rare SNP   |
| 1 | 1:170644854 | 170644854 | A | G | 0.002 | 0.001 | 0.002 |        |        |        |        |  | Rare SNP   |
| 1 | 1:170644907 | 170644907 | G | T | 0.002 | 0.002 | 0.001 |        |        |        |        |  | Rare SNP   |
| 1 | rs3021341   | 170644955 | A | C | 0.001 | 0.001 | 0.001 |        |        |        |        |  | Rare SNP   |
| 1 | 1:170644973 | 170644973 | G | A | 0.001 | 0.001 | 0.001 |        |        |        |        |  | Rare SNP   |
| 1 | 1:170645082 | 170645082 | G | A | 0.001 | 0.001 | 0     |        |        |        |        |  | Rare SNP   |
| 1 | 1:170645357 | 170645357 | C | T | 0.001 | 0     | 0.001 |        |        |        |        |  | Rare SNP   |
| 1 | 1:170645440 | 170645440 | C | T | 0.001 | 0     | 0.001 |        |        |        |        |  | Rare SNP   |
| 1 | rs2150026   | 170645489 | T | C | 0.322 | 0.331 | 0.314 | 0.0828 | 1.0863 | 0.1014 | 0.4147 |  | Common SNP |
| 1 | 1:170645594 | 170645594 | T | C | 0.002 | 0     | 0.003 |        |        |        |        |  | Rare SNP   |
| 1 | rs1016819   | 170645774 | C | G | 0.321 | 0.33  | 0.311 | 0.088  | 1.092  | 0.1016 | 0.3864 |  | Common SNP |
| 1 | 1:170645819 | 170645819 | A | G | 0.001 | 0     | 0.001 |        |        |        |        |  | Rare SNP   |
| 1 | 1:170645859 | 170645859 | T | C | 0.001 | 0.001 | 0     |        |        |        |        |  | Rare SNP   |
| 1 | 1:170645908 | 170645908 | C | T | 0.001 | 0     | 0.001 |        |        |        |        |  | Rare SNP   |
| 1 | 1:170646194 | 170646194 | T | C | 0.001 | 0.001 | 0.001 |        |        |        |        |  | Rare SNP   |
| 1 | 1:170646285 | 170646285 | G | A | 0.001 | 0.001 | 0     |        |        |        |        |  | Rare SNP   |
| 1 | 1:170646401 | 170646401 | C | T | 0.001 | 0     | 0.001 |        |        |        |        |  | Rare SNP   |
| 1 | rs76924140  | 170646418 | C | A | 0.001 | 0.001 | 0.001 |        |        |        |        |  | Rare SNP   |
| 1 | rs667190    | 170646507 | A | G | 0.001 | 0.001 | 0.001 |        |        |        |        |  | Rare SNP   |
| 1 | 1:170646593 | 170646593 | C | T | 0.001 | 0.001 | 0     |        |        |        |        |  | Rare SNP   |
| 1 | 1:170646615 | 170646615 | G | A | 0.001 | 0.001 | 0     |        |        |        |        |  | Rare SNP   |
| 1 | rs78859386  | 170646719 | G | A | 0.001 | 0     | 0.001 |        |        |        |        |  | Rare SNP   |
| 1 | 1:170646806 | 170646806 | C | T | 0.004 | 0.002 | 0.005 |        |        |        |        |  | Rare SNP   |
| 1 | rs669998    | 170647159 | C | T | 0.001 | 0.001 | 0.001 |        |        |        |        |  | Rare SNP   |

|   |             |           |   |   |       |       |       |         |        |        |        |  |            |
|---|-------------|-----------|---|---|-------|-------|-------|---------|--------|--------|--------|--|------------|
| 1 | 1:170647259 | 170647259 | A | G | 0.002 | 0     | 0.003 |         |        |        |        |  | Rare SNP   |
| 1 | 1:170647459 | 170647459 | A | C | 0.001 | 0     | 0.001 |         |        |        |        |  | Rare SNP   |
| 1 | rs75054539  | 170647620 | A | G | 0.001 | 0.001 | 0     |         |        |        |        |  | Rare SNP   |
| 1 | 1:170647624 | 170647624 | G | A | 0.001 | 0.001 | 0.001 |         |        |        |        |  | Rare SNP   |
| 1 | 1:170647660 | 170647660 | C | T | 0.001 | 0.001 | 0     |         |        |        |        |  | Rare SNP   |
| 1 | 1:170647661 | 170647661 | G | A | 0.001 | 0.001 | 0     |         |        |        |        |  | Rare SNP   |
| 1 | 1:170647742 | 170647742 | G | C | 0.004 | 0.004 | 0.004 |         |        |        |        |  | Rare SNP   |
| 1 | 1:170647873 | 170647873 | T | G | 0.001 | 0     | 0.001 |         |        |        |        |  | Rare SNP   |
| 1 | rs684506    | 170647924 | G | A | 0.001 | 0.001 | 0.001 |         |        |        |        |  | Rare SNP   |
| 1 | 1:170648080 | 170648080 | A | C | 0.001 | 0.001 | 0     |         |        |        |        |  | Rare SNP   |
| 1 | 1:170648088 | 170648088 | C | T | 0.025 | 0.024 | 0.026 | -0.0811 | 0.9221 | 0.2963 | 0.7844 |  | Common SNP |
| 1 | 1:170648341 | 170648341 | G | T | 0.001 | 0     | 0.001 |         |        |        |        |  | Rare SNP   |
| 1 | 1:170648350 | 170648350 | A | G | 0.002 | 0.001 | 0.002 |         |        |        |        |  | Rare SNP   |
| 1 | 1:170648370 | 170648370 | C | T | 0.001 | 0     | 0.001 |         |        |        |        |  | Rare SNP   |
| 1 | 1:170648391 | 170648391 | T | A | 0.001 | 0.001 | 0     |         |        |        |        |  | Rare SNP   |
| 1 | 1:170648396 | 170648396 | A | G | 0.001 | 0     | 0.001 |         |        |        |        |  | Rare SNP   |
| 1 | 1:170648563 | 170648563 | C | T | 0.002 | 0     | 0.003 |         |        |        |        |  | Rare SNP   |
| 1 | 1:170648586 | 170648586 | G | C | 0.003 | 0.002 | 0.003 |         |        |        |        |  | Rare SNP   |
| 1 | 1:170648592 | 170648592 | G | C | 0.001 | 0.001 | 0.001 |         |        |        |        |  | Rare SNP   |
| 1 | 1:170648701 | 170648701 | T | C | 0.001 | 0     | 0.001 |         |        |        |        |  | Rare SNP   |
| 1 | 1:170648912 | 170648912 | A | T | 0.001 | 0     | 0.001 |         |        |        |        |  | Rare SNP   |
| 1 | 1:170648938 | 170648938 | C | T | 0.005 | 0.003 | 0.006 |         |        |        |        |  | Rare SNP   |
| 1 | 1:170649110 | 170649110 | A | G | 0.001 | 0.001 | 0     |         |        |        |        |  | Rare SNP   |
| 1 | 1:170649141 | 170649141 | T | G | 0.001 | 0     | 0.002 |         |        |        |        |  | Rare SNP   |
| 1 | 1:170649185 | 170649185 | A | G | 0.001 | 0.001 | 0     |         |        |        |        |  | Rare SNP   |
| 1 | 1:170649337 | 170649337 | T | C | 0.002 | 0.001 | 0.002 |         |        |        |        |  | Rare SNP   |
| 1 | rs75408174  | 170649355 | G | A | 0.005 | 0.006 | 0.003 |         |        |        |        |  | Rare SNP   |
| 1 | 1:170649361 | 170649361 | C | T | 0.001 | 0.002 | 0     |         |        |        |        |  | Rare SNP   |
| 1 | 1:170649468 | 170649468 | A | G | 0.001 | 0.001 | 0.001 |         |        |        |        |  | Rare SNP   |
| 1 | 1:170649528 | 170649528 | G | T | 0.001 | 0     | 0.001 |         |        |        |        |  | Rare SNP   |
| 1 | rs74695379  | 170649543 | C | T | 0.007 | 0.009 | 0.005 |         |        |        |        |  | Rare SNP   |

|   |             |           |   |   |       |       |       |         |        |        |        |            |
|---|-------------|-----------|---|---|-------|-------|-------|---------|--------|--------|--------|------------|
| 1 | 1:170649682 | 170649682 | G | T | 0.01  | 0.011 | 0.01  | 0.1114  | 1.1178 | 0.4644 | 0.8104 | Common SNP |
| 1 | 1:170649788 | 170649788 | C | T | 0.001 | 0     | 0.001 |         |        |        |        | Rare SNP   |
| 1 | 1:170649831 | 170649831 | C | T | 0.001 | 0     | 0.001 |         |        |        |        | Rare SNP   |
| 1 | 1:170649907 | 170649907 | C | G | 0.005 | 0.004 | 0.006 |         |        |        |        | Rare SNP   |
| 1 | rs11576746  | 170649992 | A | G | 0.076 | 0.077 | 0.075 | 0.0146  | 1.0147 | 0.1773 | 0.9344 | Common SNP |
| 1 | 1:170650072 | 170650072 | T | C | 0.002 | 0.001 | 0.002 |         |        |        |        | Rare SNP   |
| 1 | 1:170650206 | 170650206 | G | A | 0.005 | 0.005 | 0.005 |         |        |        |        | Rare SNP   |
| 1 | 1:170650272 | 170650272 | G | C | 0.003 | 0.005 | 0.001 |         |        |        |        | Rare SNP   |
| 1 | 1:170650332 | 170650332 | T | A | 0.001 | 0     | 0.001 |         |        |        |        | Rare SNP   |
| 1 | 1:170650446 | 170650446 | C | A | 0.001 | 0     | 0.001 |         |        |        |        | Rare SNP   |
| 1 | 1:170650606 | 170650606 | A | G | 0.001 | 0.001 | 0     |         |        |        |        | Rare SNP   |
| 1 | 1:170650759 | 170650759 | G | A | 0.001 | 0.001 | 0.001 |         |        |        |        | Rare SNP   |
| 1 | 1:170650852 | 170650852 | C | T | 0.001 | 0.001 | 0     |         |        |        |        | Rare SNP   |
| 1 | 1:170650949 | 170650949 | G | A | 0.003 | 0.001 | 0.004 |         |        |        |        | Rare SNP   |
| 1 | 1:170651178 | 170651178 | G | C | 0.001 | 0     | 0.002 |         |        |        |        | Rare SNP   |
| 1 | 1:170651414 | 170651414 | A | C | 0.008 | 0.008 | 0.009 |         |        |        |        | Rare SNP   |
| 1 | 1:170651960 | 170651960 | A | G | 0.001 | 0.002 | 0     |         |        |        |        | Rare SNP   |
| 1 | 1:170652069 | 170652069 | T | C | 0.001 | 0     | 0.001 |         |        |        |        | Rare SNP   |
| 1 | 1:170652174 | 170652174 | A | G | 0.004 | 0.004 | 0.004 |         |        |        |        | Rare SNP   |
| 1 | 1:170652273 | 170652273 | T | C | 0.001 | 0     | 0.001 |         |        |        |        | Rare SNP   |
| 1 | 1:170652281 | 170652281 | G | A | 0.001 | 0     | 0.001 |         |        |        |        | Rare SNP   |
| 1 | 1:170652291 | 170652291 | G | A | 0.001 | 0     | 0.002 |         |        |        |        | Rare SNP   |
| 1 | rs79732385  | 170652352 | G | C | 0.001 | 0.002 | 0     |         |        |        |        | Rare SNP   |
| 1 | rs78955308  | 170652365 | G | T | 0.001 | 0.001 | 0     |         |        |        |        | Rare SNP   |
| 1 | rs12066968  | 170652434 | G | T | 0.069 | 0.066 | 0.072 | -0.0977 | 0.9069 | 0.1843 | 0.596  | Common SNP |
| 1 | 1:170652639 | 170652639 | C | T | 0.001 | 0.001 | 0     |         |        |        |        | Rare SNP   |
| 1 | rs78909375  | 170652683 | C | T | 0.017 | 0.013 | 0.02  | -0.4824 | 0.6173 | 0.3751 | 0.1985 | Common SNP |
| 1 | 1:170652819 | 170652819 | A | G | 0.001 | 0     | 0.001 |         |        |        |        | Rare SNP   |
| 1 | 1:170652992 | 170652992 | T | C | 0.001 | 0     | 0.001 |         |        |        |        | Rare SNP   |
| 1 | 1:170653138 | 170653138 | A | G | 0.001 | 0     | 0.001 |         |        |        |        | Rare SNP   |
| 1 | 1:170653184 | 170653184 | C | T | 0.002 | 0.002 | 0.001 |         |        |        |        | Rare SNP   |

|   |             |           |   |   |       |       |       |        |        |        |        |  |            |
|---|-------------|-----------|---|---|-------|-------|-------|--------|--------|--------|--------|--|------------|
| 1 | 1:170653302 | 170653302 | C | T | 0.001 | 0.001 | 0     |        |        |        |        |  | Rare SNP   |
| 1 | 1:170653318 | 170653318 | T | C | 0.001 | 0.001 | 0     |        |        |        |        |  | Rare SNP   |
| 1 | 1:170653340 | 170653340 | C | A | 0.003 | 0.002 | 0.003 |        |        |        |        |  | Rare SNP   |
| 1 | rs662871    | 170653377 | A | T | 0.398 | 0.406 | 0.39  | 0.0646 | 1.0668 | 0.0964 | 0.5025 |  | Common SNP |
| 1 | 1:170653392 | 170653392 | A | G | 0.001 | 0     | 0.001 |        |        |        |        |  | Rare SNP   |
| 1 | 1:170653501 | 170653501 | C | T | 0.001 | 0.001 | 0     |        |        |        |        |  | Rare SNP   |
| 1 | 1:170653611 | 170653611 | C | T | 0.001 | 0     | 0.002 |        |        |        |        |  | Rare SNP   |
| 1 | 1:170653767 | 170653767 | G | A | 0.001 | 0     | 0.001 |        |        |        |        |  | Rare SNP   |
| 1 | 1:170653859 | 170653859 | A | C | 0.001 | 0.001 | 0     |        |        |        |        |  | Rare SNP   |
| 1 | 1:170654107 | 170654107 | G | A | 0.001 | 0     | 0.001 |        |        |        |        |  | Rare SNP   |
| 1 | rs520131    | 170654118 | C | T | 0.397 | 0.405 | 0.39  | 0.06   | 1.0618 | 0.0963 | 0.5335 |  | Common SNP |
| 1 | rs76337363  | 170654269 | G | A | 0.001 | 0.001 | 0.001 |        |        |        |        |  | Rare SNP   |
| 1 | 1:170654303 | 170654303 | T | C | 0.001 | 0.001 | 0     |        |        |        |        |  | Rare SNP   |
| 1 | rs9426909   | 170654427 | C | T | 0.072 | 0.073 | 0.071 | 0.0159 | 1.016  | 0.1829 | 0.9306 |  | Common SNP |
| 1 | 1:170654555 | 170654555 | C | T | 0.001 | 0     | 0.001 |        |        |        |        |  | Rare SNP   |
| 1 | rs10919450  | 170654769 | A | G | 0.071 | 0.073 | 0.07  | 0.0329 | 1.0334 | 0.1835 | 0.8578 |  | Common SNP |
| 1 | 1:170654773 | 170654773 | C | T | 0.001 | 0.001 | 0     |        |        |        |        |  | Rare SNP   |
| 1 | 1:170654930 | 170654930 | G | T | 0.001 | 0     | 0.001 |        |        |        |        |  | Rare SNP   |
| 1 | 1:170655006 | 170655006 | A | G | 0.001 | 0.001 | 0     |        |        |        |        |  | Rare SNP   |
| 1 | 1:170655024 | 170655024 | T | C | 0.001 | 0.001 | 0     |        |        |        |        |  | Rare SNP   |
| 1 | 1:170655095 | 170655095 | T | C | 0.001 | 0     | 0.001 |        |        |        |        |  | Rare SNP   |
| 1 | 1:170655193 | 170655193 | T | C | 0.001 | 0     | 0.001 |        |        |        |        |  | Rare SNP   |
| 1 | 1:170655255 | 170655255 | A | C | 0.001 | 0     | 0.001 |        |        |        |        |  | Rare SNP   |
| 1 | 1:170655401 | 170655401 | T | C | 0.001 | 0.001 | 0     |        |        |        |        |  | Rare SNP   |
| 1 | 1:170655495 | 170655495 | A | G | 0.001 | 0.001 | 0     |        |        |        |        |  | Rare SNP   |
| 1 | rs76129566  | 170655676 | A | C | 0.001 | 0.001 | 0     |        |        |        |        |  | Rare SNP   |
| 1 | 1:170655847 | 170655847 | T | G | 0.001 | 0.001 | 0     |        |        |        |        |  | Rare SNP   |
| 1 | 1:170655953 | 170655953 | T | C | 0.001 | 0.001 | 0     |        |        |        |        |  | Rare SNP   |
| 1 | 1:170656006 | 170656006 | A | G | 0.003 | 0.001 | 0.004 |        |        |        |        |  | Rare SNP   |
| 1 | 1:170656099 | 170656099 | T | C | 0.001 | 0.001 | 0     |        |        |        |        |  | Rare SNP   |
| 1 | 1:170656239 | 170656239 | T | A | 0.001 | 0     | 0.001 |        |        |        |        |  | Rare SNP   |

|   |             |           |   |   |       |       |       |         |        |        |        |  |  |            |
|---|-------------|-----------|---|---|-------|-------|-------|---------|--------|--------|--------|--|--|------------|
| 1 | 1:170656317 | 170656317 | C | A | 0.002 | 0.003 | 0     |         |        |        |        |  |  | Rare SNP   |
| 1 | 1:170656349 | 170656349 | C | T | 0.001 | 0.001 | 0.001 |         |        |        |        |  |  | Rare SNP   |
| 1 | 1:170656408 | 170656408 | G | A | 0.001 | 0.001 | 0.001 |         |        |        |        |  |  | Rare SNP   |
| 1 | 1:170656410 | 170656410 | C | G | 0.001 | 0     | 0.001 |         |        |        |        |  |  | Rare SNP   |
| 1 | 1:170656460 | 170656460 | C | A | 0.001 | 0     | 0.001 |         |        |        |        |  |  | Rare SNP   |
| 1 | 1:170656571 | 170656571 | G | C | 0.001 | 0.001 | 0     |         |        |        |        |  |  | Rare SNP   |
| 1 | rs75817690  | 170656609 | G | A | 0.005 | 0.003 | 0.006 |         |        |        |        |  |  | Rare SNP   |
| 1 | 1:170656649 | 170656649 | C | T | 0.003 | 0.002 | 0.004 |         |        |        |        |  |  | Rare SNP   |
| 1 | 1:170656770 | 170656770 | A | G | 0.001 | 0.001 | 0     |         |        |        |        |  |  | Rare SNP   |
| 1 | 1:170656922 | 170656922 | C | T | 0.001 | 0     | 0.001 |         |        |        |        |  |  | Rare SNP   |
| 1 | 1:170657107 | 170657107 | A | C | 0.001 | 0.001 | 0     |         |        |        |        |  |  | Rare SNP   |
| 1 | rs76670772  | 170657117 | C | G | 0.001 | 0     | 0.001 |         |        |        |        |  |  | Rare SNP   |
| 1 | 1:170657142 | 170657142 | A | G | 0.001 | 0.001 | 0     |         |        |        |        |  |  | Rare SNP   |
| 1 | 1:170657331 | 170657331 | G | T | 0.001 | 0     | 0.001 |         |        |        |        |  |  | Rare SNP   |
| 1 | rs17550940  | 170657335 | A | C | 0.32  | 0.33  | 0.31  | 0.093   | 1.0975 | 0.1016 | 0.36   |  |  | Common SNP |
| 1 | 1:170657582 | 170657582 | G | A | 0.001 | 0     | 0.001 |         |        |        |        |  |  | Rare SNP   |
| 1 | 1:170657773 | 170657773 | C | T | 0.002 | 0.004 | 0     |         |        |        |        |  |  | Rare SNP   |
| 1 | 1:170657928 | 170657928 | A | C | 0.016 | 0.015 | 0.016 | -0.0738 | 0.9289 | 0.3659 | 0.8402 |  |  | Common SNP |
| 1 | rs531650    | 170657994 | C | T | 0.27  | 0.293 | 0.247 | 0.2462  | 1.2792 | 0.1069 | 0.0213 |  |  | Common SNP |
| 1 | rs80313408  | 170658008 | A | T | 0.001 | 0     | 0.001 |         |        |        |        |  |  | Rare SNP   |
| 1 | 1:170658056 | 170658056 | G | A | 0.001 | 0.001 | 0     |         |        |        |        |  |  | Rare SNP   |
| 1 | 1:170658076 | 170658076 | T | C | 0.002 | 0.002 | 0.002 |         |        |        |        |  |  | Rare SNP   |
| 1 | rs79511990  | 170658104 | A | G | 0.001 | 0     | 0.001 |         |        |        |        |  |  | Rare SNP   |
| 1 | 1:170658275 | 170658275 | T | A | 0.001 | 0.001 | 0     |         |        |        |        |  |  | Rare SNP   |
| 1 | rs12723586  | 170658324 | G | T | 0.121 | 0.104 | 0.138 | -0.3295 | 0.7193 | 0.1463 | 0.0243 |  |  | Common SNP |
| 1 | rs76231658  | 170658332 | A | C | 0.031 | 0.035 | 0.028 | 0.2212  | 1.2476 | 0.273  | 0.4178 |  |  | Common SNP |
| 1 | rs12744534  | 170658355 | A | G | 0.121 | 0.104 | 0.138 | -0.3295 | 0.7193 | 0.1463 | 0.0243 |  |  | Common SNP |
| 1 | 1:170658527 | 170658527 | C | A | 0.001 | 0.001 | 0     |         |        |        |        |  |  | Rare SNP   |
| 1 | rs505271    | 170658528 | A | G | 0.002 | 0.002 | 0.001 |         |        |        |        |  |  | Rare SNP   |
| 1 | 1:170658633 | 170658633 | T | G | 0.001 | 0     | 0.001 |         |        |        |        |  |  | Rare SNP   |
| 1 | 1:170658642 | 170658642 | T | C | 0.002 | 0.002 | 0.001 |         |        |        |        |  |  | Rare SNP   |

|   |             |           |   |   |       |       |       |         |       |        |        |  |            |
|---|-------------|-----------|---|---|-------|-------|-------|---------|-------|--------|--------|--|------------|
| 1 | 1:170658689 | 170658689 | G | T | 0.001 | 0     | 0.001 |         |       |        |        |  | Rare SNP   |
| 1 | 1:170658892 | 170658892 | A | G | 0.001 | 0.001 | 0     |         |       |        |        |  | Rare SNP   |
| 1 | 1:170659034 | 170659034 | C | T | 0.002 | 0     | 0.003 |         |       |        |        |  | Rare SNP   |
| 1 | 1:170659125 | 170659125 | G | T | 0.001 | 0     | 0.001 |         |       |        |        |  | Rare SNP   |
| 1 | rs12079725  | 170659205 | C | G | 0.001 | 0     | 0.002 |         |       |        |        |  | Rare SNP   |
| 1 | 1:170659236 | 170659236 | A | G | 0.001 | 0     | 0.001 |         |       |        |        |  | Rare SNP   |
| 1 | 1:170659282 | 170659282 | A | T | 0.001 | 0.001 | 0     |         |       |        |        |  | Rare SNP   |
| 1 | 1:170659311 | 170659311 | G | A | 0.001 | 0     | 0.001 |         |       |        |        |  | Rare SNP   |
| 1 | 1:170659312 | 170659312 | C | A | 0.001 | 0     | 0.001 |         |       |        |        |  | Rare SNP   |
| 1 | 1:170659359 | 170659359 | T | C | 0.001 | 0.001 | 0     |         |       |        |        |  | Rare SNP   |
| 1 | 1:170659413 | 170659413 | C | T | 0.002 | 0.003 | 0     |         |       |        |        |  | Rare SNP   |
| 1 | 1:170659418 | 170659418 | T | C | 0.001 | 0.001 | 0     |         |       |        |        |  | Rare SNP   |
| 1 | 1:170659437 | 170659437 | G | A | 0.015 | 0.011 | 0.018 | -0.5413 | 0.582 | 0.4043 | 0.1806 |  | Common SNP |
| 1 | 1:170659638 | 170659638 | G | A | 0.001 | 0.001 | 0     |         |       |        |        |  | Rare SNP   |
| 1 | 1:170659953 | 170659953 | G | T | 0.001 | 0     | 0.001 |         |       |        |        |  | Rare SNP   |
| 1 | 1:170660058 | 170660058 | T | A | 0.001 | 0     | 0.001 |         |       |        |        |  | Rare SNP   |
| 1 | 1:170660170 | 170660170 | G | T | 0.001 | 0.001 | 0     |         |       |        |        |  | Rare SNP   |
| 1 | 1:170660186 | 170660186 | G | A | 0.001 | 0.001 | 0     |         |       |        |        |  | Rare SNP   |
| 1 | 1:170660211 | 170660211 | T | C | 0.001 | 0.001 | 0     |         |       |        |        |  | Rare SNP   |
| 1 | 1:170660388 | 170660388 | G | T | 0.001 | 0     | 0.001 |         |       |        |        |  | Rare SNP   |
| 1 | 1:170660413 | 170660413 | A | C | 0.015 | 0.011 | 0.018 | -0.5413 | 0.582 | 0.4043 | 0.1806 |  | Common SNP |
| 1 | rs79371244  | 170660451 | C | T | 0.002 | 0.001 | 0.002 |         |       |        |        |  | Rare SNP   |
| 1 | 1:170660731 | 170660731 | T | A | 0.001 | 0     | 0.001 |         |       |        |        |  | Rare SNP   |
| 1 | 1:170660785 | 170660785 | C | T | 0.001 | 0.001 | 0     |         |       |        |        |  | Rare SNP   |
| 1 | 1:170660947 | 170660947 | A | C | 0.001 | 0     | 0.002 |         |       |        |        |  | Rare SNP   |
| 1 | 1:170661039 | 170661039 | G | T | 0.001 | 0.002 | 0     |         |       |        |        |  | Rare SNP   |
| 1 | 1:170661139 | 170661139 | G | A | 0.001 | 0     | 0.001 |         |       |        |        |  | Rare SNP   |
| 1 | 1:170661225 | 170661225 | T | C | 0.001 | 0     | 0.001 |         |       |        |        |  | Rare SNP   |
| 1 | 1:170661306 | 170661306 | A | T | 0.001 | 0     | 0.001 |         |       |        |        |  | Rare SNP   |
| 1 | 1:170661334 | 170661334 | C | T | 0.001 | 0.001 | 0.001 |         |       |        |        |  | Rare SNP   |
| 1 | 1:170661362 | 170661362 | T | A | 0.001 | 0     | 0.001 |         |       |        |        |  | Rare SNP   |

|   |             |           |   |   |       |       |       |         |        |        |        |  |            |
|---|-------------|-----------|---|---|-------|-------|-------|---------|--------|--------|--------|--|------------|
| 1 | 1:170661432 | 170661432 | T | G | 0.001 | 0.001 | 0     |         |        |        |        |  | Rare SNP   |
| 1 | rs4656221   | 170661470 | A | G | 0.313 | 0.319 | 0.307 | 0.0562  | 1.0578 | 0.1016 | 0.5803 |  | Common SNP |
| 1 | rs77828580  | 170661674 | T | A | 0.003 | 0.002 | 0.004 |         |        |        |        |  | Rare SNP   |
| 1 | rs4656222   | 170661688 | T | A | 0.313 | 0.319 | 0.306 | 0.0616  | 1.0636 | 0.1018 | 0.5449 |  | Common SNP |
| 1 | 1:170661689 | 170661689 | A | G | 0.001 | 0.001 | 0     |         |        |        |        |  | Rare SNP   |
| 1 | rs489090    | 170661764 | C | A | 0.181 | 0.205 | 0.157 | 0.328   | 1.3882 | 0.123  | 0.0077 |  | Common SNP |
| 1 | 1:170661803 | 170661803 | G | A | 0.001 | 0.002 | 0     |         |        |        |        |  | Rare SNP   |
| 1 | 1:170661810 | 170661810 | T | C | 0.001 | 0.001 | 0     |         |        |        |        |  | Rare SNP   |
| 1 | 1:170661865 | 170661865 | C | G | 0.001 | 0     | 0.001 |         |        |        |        |  | Rare SNP   |
| 1 | 1:170661952 | 170661952 | A | G | 0.001 | 0     | 0.001 |         |        |        |        |  | Rare SNP   |
| 1 | 1:170662045 | 170662045 | A | G | 0.001 | 0     | 0.002 |         |        |        |        |  | Rare SNP   |
| 1 | 1:170662080 | 170662080 | T | G | 0.001 | 0.002 | 0     |         |        |        |        |  | Rare SNP   |
| 1 | rs61817382  | 170662120 | A | G | 0.316 | 0.32  | 0.311 | 0.0404  | 1.0413 | 0.1009 | 0.6888 |  | Common SNP |
| 1 | rs78214791  | 170662195 | C | T | 0.002 | 0.001 | 0.002 |         |        |        |        |  | Rare SNP   |
| 1 | 1:170662423 | 170662423 | T | C | 0.001 | 0.001 | 0.001 |         |        |        |        |  | Rare SNP   |
| 1 | 1:170662577 | 170662577 | C | A | 0.001 | 0.001 | 0     |         |        |        |        |  | Rare SNP   |
| 1 | rs71635674  | 170662598 | G | C | 0.119 | 0.102 | 0.136 | -0.3374 | 0.7136 | 0.1479 | 0.0225 |  | Common SNP |
| 1 | 1:170662627 | 170662627 | G | A | 0.001 | 0     | 0.001 |         |        |        |        |  | Rare SNP   |
| 1 | 1:170663299 | 170663299 | C | G | 0.006 | 0.009 | 0.003 |         |        |        |        |  | Rare SNP   |
| 1 | 1:170663326 | 170663326 | A | G | 0.001 | 0.001 | 0.001 |         |        |        |        |  | Rare SNP   |
| 1 | 1:170663368 | 170663368 | T | C | 0.001 | 0.001 | 0     |         |        |        |        |  | Rare SNP   |
| 1 | 1:170663461 | 170663461 | G | A | 0.001 | 0.001 | 0     |         |        |        |        |  | Rare SNP   |
| 1 | rs541618    | 170663475 | A | G | 0.489 | 0.5   | 0.477 | 0.0926  | 1.097  | 0.0932 | 0.3205 |  | Common SNP |
| 1 | 1:170663509 | 170663509 | A | G | 0.001 | 0.001 | 0     |         |        |        |        |  | Rare SNP   |
| 1 | 1:170663682 | 170663682 | G | A | 0.001 | 0     | 0.001 |         |        |        |        |  | Rare SNP   |
| 1 | 1:170663982 | 170663982 | G | T | 0.002 | 0.002 | 0.001 |         |        |        |        |  | Rare SNP   |
| 1 | rs12130326  | 170664053 | G | T | 0.072 | 0.074 | 0.07  | 0.05    | 1.0513 | 0.1829 | 0.7846 |  | Common SNP |
| 1 | 1:170664127 | 170664127 | G | A | 0.001 | 0.001 | 0.001 |         |        |        |        |  | Rare SNP   |
| 1 | rs513287    | 170664237 | G | A | 0.491 | 0.497 | 0.478 | 0.1011  | 1.1064 | 0.0932 | 0.2777 |  | Common SNP |
| 1 | rs75143924  | 170664253 | C | T | 0.001 | 0     | 0.002 |         |        |        |        |  | Rare SNP   |
| 1 | 1:170664434 | 170664434 | T | C | 0.001 | 0.001 | 0     |         |        |        |        |  | Rare SNP   |

|   |             |           |   |   |       |       |       |         |        |        |        |  |            |
|---|-------------|-----------|---|---|-------|-------|-------|---------|--------|--------|--------|--|------------|
| 1 | rs75423408  | 170664440 | T | C | 0.001 | 0.001 | 0     |         |        |        |        |  | Rare SNP   |
| 1 | rs76087661  | 170664504 | G | T | 0.021 | 0.021 | 0.022 | -0.0431 | 0.9578 | 0.3278 | 0.8954 |  | Common SNP |
| 1 | rs58668918  | 170664669 | G | C | 0.002 | 0.001 | 0.002 |         |        |        |        |  | Rare SNP   |
| 1 | 1:170664706 | 170664706 | A | G | 0.005 | 0.004 | 0.006 |         |        |        |        |  | Rare SNP   |
| 1 | 1:170664753 | 170664753 | G | T | 0.001 | 0     | 0.001 |         |        |        |        |  | Rare SNP   |
| 1 | 1:170664862 | 170664862 | C | T | 0.001 | 0.001 | 0     |         |        |        |        |  | Rare SNP   |
| 1 | 1:170664873 | 170664873 | T | A | 0.001 | 0.001 | 0     |         |        |        |        |  | Rare SNP   |
| 1 | 1:170664942 | 170664942 | C | G | 0.001 | 0.001 | 0     |         |        |        |        |  | Rare SNP   |
| 1 | 1:170665010 | 170665010 | C | T | 0.001 | 0     | 0.001 |         |        |        |        |  | Rare SNP   |
| 1 | 1:170665152 | 170665152 | C | T | 0.001 | 0.002 | 0     |         |        |        |        |  | Rare SNP   |
| 1 | 1:170665177 | 170665177 | A | G | 0.001 | 0     | 0.001 |         |        |        |        |  | Rare SNP   |
| 1 | rs61817383  | 170665348 | C | T | 0.311 | 0.316 | 0.305 | 0.0517  | 1.053  | 0.1019 | 0.6123 |  | Common SNP |
| 1 | 1:170665440 | 170665440 | A | G | 0.001 | 0     | 0.001 |         |        |        |        |  | Rare SNP   |
| 1 | 1:170665568 | 170665568 | T | C | 0.001 | 0.001 | 0     |         |        |        |        |  | Rare SNP   |
| 1 | 1:170665595 | 170665595 | A | T | 0.001 | 0     | 0.001 |         |        |        |        |  | Rare SNP   |
| 1 | rs12566345  | 170665664 | C | T | 0.118 | 0.102 | 0.135 | -0.327  | 0.7211 | 0.148  | 0.0271 |  | Common SNP |
| 1 | rs12123292  | 170665672 | A | T | 0.072 | 0.074 | 0.07  | 0.05    | 1.0513 | 0.1829 | 0.7846 |  | Common SNP |
| 1 | rs78647140  | 170665785 | A | G | 0.001 | 0.002 | 0     |         |        |        |        |  | Rare SNP   |
| 1 | 1:170666106 | 170666106 | T | C | 0.001 | 0     | 0.002 |         |        |        |        |  | Rare SNP   |
| 1 | 1:170666223 | 170666223 | G | C | 0.001 | 0     | 0.001 |         |        |        |        |  | Rare SNP   |
| 1 | 1:170666237 | 170666237 | C | A | 0.001 | 0     | 0.001 |         |        |        |        |  | Rare SNP   |
| 1 | rs75551901  | 170666282 | T | C | 0.002 | 0.001 | 0.002 |         |        |        |        |  | Rare SNP   |
| 1 | 1:170666331 | 170666331 | A | C | 0.001 | 0     | 0.001 |         |        |        |        |  | Rare SNP   |
| 1 | 1:170666350 | 170666350 | G | A | 0.015 | 0.013 | 0.016 | -0.2182 | 0.804  | 0.3937 | 0.5794 |  | Common SNP |
| 1 | 1:170666355 | 170666355 | G | A | 0.001 | 0.001 | 0     |         |        |        |        |  | Rare SNP   |
| 1 | 1:170666497 | 170666497 | A | G | 0.001 | 0     | 0.001 |         |        |        |        |  | Rare SNP   |
| 1 | 1:170666539 | 170666539 | T | C | 0.001 | 0     | 0.001 |         |        |        |        |  | Rare SNP   |
| 1 | 1:170666574 | 170666574 | T | C | 0.001 | 0.001 | 0     |         |        |        |        |  | Rare SNP   |
| 1 | 1:170666675 | 170666675 | A | T | 0.001 | 0     | 0.001 |         |        |        |        |  | Rare SNP   |
| 1 | rs674213    | 170666854 | T | C | 0.078 | 0.079 | 0.076 | 0.0379  | 1.0387 | 0.1752 | 0.8286 |  | Common SNP |
| 1 | rs59011246  | 170667033 | A | G | 0.002 | 0.001 | 0.002 |         |        |        |        |  | Rare SNP   |



|   |             |           |   |   |       |       |       |         |        |        |        |  |            |
|---|-------------|-----------|---|---|-------|-------|-------|---------|--------|--------|--------|--|------------|
| 1 | 1:170667219 | 170667219 | G | A | 0.001 | 0     | 0.001 |         |        |        |        |  | Rare SNP   |
| 1 | 1:170667458 | 170667458 | T | G | 0.001 | 0.001 | 0     |         |        |        |        |  | Rare SNP   |
| 1 | 1:170667635 | 170667635 | A | C | 0.004 | 0.003 | 0.004 |         |        |        |        |  | Rare SNP   |
| 1 | 1:170667675 | 170667675 | C | T | 0.001 | 0.001 | 0     |         |        |        |        |  | Rare SNP   |
| 1 | 1:170667757 | 170667757 | T | C | 0.001 | 0     | 0.001 |         |        |        |        |  | Rare SNP   |
| 1 | 1:170667829 | 170667829 | G | A | 0.001 | 0.001 | 0     |         |        |        |        |  | Rare SNP   |
| 1 | 1:170667884 | 170667884 | C | A | 0.001 | 0.001 | 0     |         |        |        |        |  | Rare SNP   |
| 1 | rs61640808  | 170668018 | G | T | 0.002 | 0.001 | 0.002 |         |        |        |        |  | Rare SNP   |
| 1 | 1:170668036 | 170668036 | C | T | 0.001 | 0     | 0.001 |         |        |        |        |  | Rare SNP   |
| 1 | 1:170668037 | 170668037 | C | T | 0.001 | 0.001 | 0     |         |        |        |        |  | Rare SNP   |
| 1 | 1:170668148 | 170668148 | C | T | 0.001 | 0.001 | 0     |         |        |        |        |  | Rare SNP   |
| 1 | rs72705060  | 170668367 | C | A | 0.108 | 0.101 | 0.115 | -0.1532 | 0.858  | 0.1503 | 0.308  |  | Common SNP |
| 1 | 1:170668368 | 170668368 | C | T | 0.001 | 0     | 0.001 |         |        |        |        |  | Rare SNP   |
| 1 | 1:170668551 | 170668551 | A | G | 0.001 | 0.001 | 0     |         |        |        |        |  | Rare SNP   |
| 1 | rs80071911  | 170668663 | G | C | 0.002 | 0.001 | 0.002 |         |        |        |        |  | Rare SNP   |
| 1 | 1:170668808 | 170668808 | G | A | 0.006 | 0.008 | 0.004 |         |        |        |        |  | Rare SNP   |
| 1 | 1:170668809 | 170668809 | A | T | 0.002 | 0.002 | 0.001 |         |        |        |        |  | Rare SNP   |
| 1 | rs74225329  | 170668907 | C | T | 0.001 | 0.002 | 0     |         |        |        |        |  | Rare SNP   |
| 1 | 1:170668910 | 170668910 | T | C | 0.001 | 0     | 0.001 |         |        |        |        |  | Rare SNP   |
| 1 | 1:170668938 | 170668938 | G | A | 0.001 | 0     | 0.001 |         |        |        |        |  | Rare SNP   |
| 1 | 1:170668995 | 170668995 | G | A | 0.001 | 0     | 0.001 |         |        |        |        |  | Rare SNP   |
| 1 | 1:170669021 | 170669021 | C | T | 0.004 | 0.005 | 0.003 |         |        |        |        |  | Rare SNP   |
| 1 | 1:170669037 | 170669037 | C | T | 0.001 | 0     | 0.002 |         |        |        |        |  | Rare SNP   |
| 1 | rs550559    | 170669109 | A | G | 0.075 | 0.077 | 0.073 | 0.0466  | 1.0477 | 0.177  | 0.7924 |  | Common SNP |
| 1 | 1:170669115 | 170669115 | A | G | 0.001 | 0     | 0.002 |         |        |        |        |  | Rare SNP   |
| 1 | 1:170669166 | 170669166 | C | T | 0.001 | 0.001 | 0     |         |        |        |        |  | Rare SNP   |
| 1 | rs76987566  | 170669205 | C | T | 0.014 | 0.012 | 0.016 | -0.3077 | 0.7351 | 0.4033 | 0.4455 |  | Common SNP |
| 1 | rs547769    | 170669399 | A | G | 0.002 | 0.002 | 0.002 |         |        |        |        |  | Rare SNP   |
| 1 | 1:170669431 | 170669431 | G | T | 0.002 | 0.003 | 0     |         |        |        |        |  | Rare SNP   |
| 1 | 1:170669445 | 170669445 | G | A | 0.002 | 0.001 | 0.002 |         |        |        |        |  | Rare SNP   |
| 1 | 1:170669491 | 170669491 | T | A | 0.001 | 0     | 0.001 |         |        |        |        |  | Rare SNP   |

|   |             |           |   |   |       |       |       |        |        |        |        |  |            |
|---|-------------|-----------|---|---|-------|-------|-------|--------|--------|--------|--------|--|------------|
| 1 | 1:170669523 | 170669523 | C | T | 0.001 | 0.001 | 0     |        |        |        |        |  | Rare SNP   |
| 1 | 1:170669524 | 170669524 | G | A | 0.001 | 0.001 | 0     |        |        |        |        |  | Rare SNP   |
| 1 | 1:170669577 | 170669577 | T | G | 0.002 | 0.003 | 0.001 |        |        |        |        |  | Rare SNP   |
| 1 | rs78013753  | 170669617 | T | C | 0.001 | 0     | 0.001 |        |        |        |        |  | Rare SNP   |
| 1 | 1:170669897 | 170669897 | C | T | 0.001 | 0.001 | 0     |        |        |        |        |  | Rare SNP   |
| 1 | 1:170669991 | 170669991 | C | T | 0.001 | 0.001 | 0     |        |        |        |        |  | Rare SNP   |
| 1 | 1:170669992 | 170669992 | G | A | 0.001 | 0     | 0.001 |        |        |        |        |  | Rare SNP   |
| 1 | 1:170670098 | 170670098 | C | G | 0.001 | 0     | 0.001 |        |        |        |        |  | Rare SNP   |
| 1 | 1:170670378 | 170670378 | T | C | 0.001 | 0.001 | 0.001 |        |        |        |        |  | Rare SNP   |
| 1 | rs517508    | 170670424 | T | C | 0.073 | 0.076 | 0.071 | 0.0641 | 1.0661 | 0.1799 | 0.7218 |  | Common SNP |
| 1 | rs7539534   | 170670456 | T | C | 0.071 | 0.074 | 0.069 | 0.0667 | 1.069  | 0.1836 | 0.7161 |  | Common SNP |
| 1 | 1:170670644 | 170670644 | A | G | 0.001 | 0.001 | 0     |        |        |        |        |  | Rare SNP   |
| 1 | rs7527909   | 170670661 | G | A | 0.07  | 0.073 | 0.067 | 0.0852 | 1.0889 | 0.1853 | 0.6457 |  | Common SNP |
| 1 | 1:170670679 | 170670679 | T | A | 0.001 | 0     | 0.001 |        |        |        |        |  | Rare SNP   |
| 1 | 1:170670875 | 170670875 | A | G | 0.002 | 0.004 | 0     |        |        |        |        |  | Rare SNP   |
| 1 | 1:170670905 | 170670905 | A | T | 0.001 | 0     | 0.001 |        |        |        |        |  | Rare SNP   |
| 1 | 1:170671101 | 170671101 | C | T | 0.001 | 0.001 | 0     |        |        |        |        |  | Rare SNP   |
| 1 | 1:170671129 | 170671129 | T | C | 0.004 | 0.002 | 0.006 |        |        |        |        |  | Rare SNP   |
| 1 | 1:170671181 | 170671181 | T | G | 0.001 | 0.001 | 0     |        |        |        |        |  | Rare SNP   |
| 1 | 1:170671284 | 170671284 | A | G | 0.009 | 0.009 | 0.01  |        |        |        |        |  | Rare SNP   |
| 1 | 1:170671303 | 170671303 | G | T | 0.001 | 0     | 0.001 |        |        |        |        |  | Rare SNP   |
| 1 | 1:170671330 | 170671330 | G | T | 0.001 | 0.001 | 0     |        |        |        |        |  | Rare SNP   |
| 1 | 1:170671385 | 170671385 | C | G | 0.001 | 0.001 | 0     |        |        |        |        |  | Rare SNP   |
| 1 | 1:170671435 | 170671435 | C | T | 0.001 | 0.002 | 0     |        |        |        |        |  | Rare SNP   |
| 1 | 1:170671477 | 170671477 | G | A | 0.001 | 0     | 0.001 |        |        |        |        |  | Rare SNP   |
| 1 | 1:170671508 | 170671508 | T | A | 0.001 | 0.001 | 0     |        |        |        |        |  | Rare SNP   |
| 1 | rs61817384  | 170671541 | G | A | 0.288 | 0.294 | 0.282 | 0.0588 | 1.0605 | 0.1041 | 0.5724 |  | Common SNP |
| 1 | 1:170671591 | 170671591 | T | G | 0.001 | 0.001 | 0     |        |        |        |        |  | Rare SNP   |
| 1 | 1:170671601 | 170671601 | G | A | 0.001 | 0     | 0.001 |        |        |        |        |  | Rare SNP   |
| 1 | 1:170671838 | 170671838 | G | T | 0.001 | 0     | 0.001 |        |        |        |        |  | Rare SNP   |
| 1 | 1:170671916 | 170671916 | G | A | 0.001 | 0.001 | 0     |        |        |        |        |  | Rare SNP   |

|   |             |           |   |   |       |       |       |        |        |        |        |            |
|---|-------------|-----------|---|---|-------|-------|-------|--------|--------|--------|--------|------------|
| 1 | rs17551016  | 170671962 | G | T | 0.288 | 0.294 | 0.282 | 0.0588 | 1.0605 | 0.1041 | 0.5724 | Common SNP |
| 1 | 1:170672037 | 170672037 | C | A | 0.002 | 0.002 | 0.001 |        |        |        |        | Rare SNP   |
| 1 | 1:170672114 | 170672114 | C | G | 0.001 | 0.001 | 0     |        |        |        |        | Rare SNP   |
| 1 | 1:170672170 | 170672170 | G | A | 0.001 | 0     | 0.001 |        |        |        |        | Rare SNP   |
| 1 | 1:170672293 | 170672293 | G | A | 0.001 | 0.001 | 0     |        |        |        |        | Rare SNP   |
| 1 | 1:170672319 | 170672319 | C | T | 0.002 | 0.003 | 0     |        |        |        |        | Rare SNP   |
| 1 | 1:170672335 | 170672335 | G | C | 0.004 | 0.005 | 0.002 |        |        |        |        | Rare SNP   |
| 1 | 1:170672525 | 170672525 | A | G | 0.001 | 0.001 | 0     |        |        |        |        | Rare SNP   |
| 1 | 1:170672847 | 170672847 | A | G | 0.001 | 0     | 0.001 |        |        |        |        | Rare SNP   |
| 1 | 1:170672951 | 170672951 | A | G | 0.002 | 0.002 | 0.001 |        |        |        |        | Rare SNP   |
| 1 | 1:170673057 | 170673057 | A | G | 0.001 | 0.001 | 0     |        |        |        |        | Rare SNP   |
| 1 | rs72705061  | 170673149 | T | G | 0.007 | 0.008 | 0.006 |        |        |        |        | Rare SNP   |
| 1 | 1:170673195 | 170673195 | T | G | 0.001 | 0     | 0.001 |        |        |        |        | Rare SNP   |
| 1 | 1:170673204 | 170673204 | T | C | 0.001 | 0.001 | 0     |        |        |        |        | Rare SNP   |
| 1 | 1:170673250 | 170673250 | T | A | 0.001 | 0     | 0.001 |        |        |        |        | Rare SNP   |
| 1 | 1:170673407 | 170673407 | G | A | 0.001 | 0.001 | 0     |        |        |        |        | Rare SNP   |
| 1 | 1:170673435 | 170673435 | A | G | 0.001 | 0.001 | 0     |        |        |        |        | Rare SNP   |
| 1 | 1:170673445 | 170673445 | G | A | 0.001 | 0     | 0.001 |        |        |        |        | Rare SNP   |
| 1 | rs76157942  | 170673491 | A | T | 0.019 | 0.022 | 0.017 | 0.2433 | 1.2755 | 0.3422 | 0.4772 | Common SNP |
| 1 | 1:170673560 | 170673560 | G | A | 0.001 | 0.001 | 0     |        |        |        |        | Rare SNP   |
| 1 | rs79595190  | 170673779 | C | T | 0.002 | 0.001 | 0.002 |        |        |        |        | Rare SNP   |
| 1 | 1:170673789 | 170673789 | A | G | 0.001 | 0.002 | 0     |        |        |        |        | Rare SNP   |
| 1 | 1:170673850 | 170673850 | G | T | 0.001 | 0.001 | 0     |        |        |        |        | Rare SNP   |
| 1 | 1:170673968 | 170673968 | G | C | 0.001 | 0     | 0.002 |        |        |        |        | Rare SNP   |
| 1 | 1:170674151 | 170674151 | C | T | 0.001 | 0     | 0.001 |        |        |        |        | Rare SNP   |
| 1 | rs74545461  | 170674261 | T | C | 0.071 | 0.074 | 0.069 | 0.0667 | 1.069  | 0.1836 | 0.7161 | Common SNP |
| 1 | 1:170674274 | 170674274 | C | T | 0.001 | 0.001 | 0     |        |        |        |        | Rare SNP   |
| 1 | 1:170674600 | 170674600 | T | A | 0.001 | 0     | 0.001 |        |        |        |        | Rare SNP   |
| 1 | 1:170674624 | 170674624 | A | G | 0.001 | 0     | 0.001 |        |        |        |        | Rare SNP   |
| 1 | 1:170674778 | 170674778 | A | G | 0.001 | 0.001 | 0     |        |        |        |        | Rare SNP   |
| 1 | 1:170674826 | 170674826 | A | G | 0.002 | 0.001 | 0.002 |        |        |        |        | Rare SNP   |

|   |             |           |   |   |       |       |       |        |        |        |        |            |
|---|-------------|-----------|---|---|-------|-------|-------|--------|--------|--------|--------|------------|
| 1 | rs7540713   | 170674903 | C | T | 0.308 | 0.297 | 0.319 | -0.107 | 0.8985 | 0.1007 | 0.2877 | Common SNP |
| 1 | 1:170675135 | 170675135 | C | A | 0.001 | 0.001 | 0.001 |        |        |        |        | Rare SNP   |
| 1 | 1:170675262 | 170675262 | T | A | 0.001 | 0.002 | 0     |        |        |        |        | Rare SNP   |
| 1 | 1:170675376 | 170675376 | T | C | 0.001 | 0     | 0.001 |        |        |        |        | Rare SNP   |
| 1 | 1:170675568 | 170675568 | T | C | 0.001 | 0.001 | 0     |        |        |        |        | Rare SNP   |
| 1 | 1:170675637 | 170675637 | A | G | 0.001 | 0.001 | 0     |        |        |        |        | Rare SNP   |
| 1 | rs10753818  | 170675672 | C | T | 0.011 | 0.012 | 0.01  | 0.2205 | 1.2467 | 0.4554 | 0.6282 | Common SNP |
| 1 | rs74123161  | 170675711 | T | C | 0.002 | 0.002 | 0.002 |        |        |        |        | Rare SNP   |
| 1 | 1:170675849 | 170675849 | T | C | 0.001 | 0     | 0.001 |        |        |        |        | Rare SNP   |
| 1 | 1:170675889 | 170675889 | T | G | 0.001 | 0.001 | 0     |        |        |        |        | Rare SNP   |
| 1 | 1:170675951 | 170675951 | G | A | 0.001 | 0.001 | 0.001 |        |        |        |        | Rare SNP   |
| 1 | 1:170676149 | 170676149 | C | G | 0.001 | 0     | 0.001 |        |        |        |        | Rare SNP   |
| 1 | 1:170676191 | 170676191 | A | G | 0.001 | 0     | 0.002 |        |        |        |        | Rare SNP   |
| 1 | 1:170676222 | 170676222 | G | C | 0.001 | 0     | 0.001 |        |        |        |        | Rare SNP   |
| 1 | 1:170676272 | 170676272 | A | G | 0.001 | 0     | 0.001 |        |        |        |        | Rare SNP   |
| 1 | 1:170676519 | 170676519 | A | G | 0.001 | 0     | 0.002 |        |        |        |        | Rare SNP   |
| 1 | 1:170676527 | 170676527 | T | C | 0.001 | 0.001 | 0     |        |        |        |        | Rare SNP   |
| 1 | 1:170676536 | 170676536 | T | G | 0.001 | 0.001 | 0     |        |        |        |        | Rare SNP   |
| 1 | 1:170676546 | 170676546 | C | T | 0.002 | 0.004 | 0     |        |        |        |        | Rare SNP   |
| 1 | 1:170676628 | 170676628 | T | C | 0.001 | 0.001 | 0     |        |        |        |        | Rare SNP   |
| 1 | 1:170676944 | 170676944 | G | A | 0.001 | 0.001 | 0     |        |        |        |        | Rare SNP   |
| 1 | rs73036614  | 170677088 | T | C | 0.002 | 0.002 | 0.002 |        |        |        |        | Rare SNP   |
| 1 | 1:170677164 | 170677164 | G | A | 0.001 | 0.001 | 0     |        |        |        |        | Rare SNP   |
| 1 | 1:170677197 | 170677197 | T | A | 0.001 | 0.001 | 0     |        |        |        |        | Rare SNP   |
| 1 | 1:170677268 | 170677268 | T | C | 0.001 | 0     | 0.001 |        |        |        |        | Rare SNP   |
| 1 | 1:170677280 | 170677280 | G | A | 0.001 | 0     | 0.001 |        |        |        |        | Rare SNP   |
| 1 | 1:170677374 | 170677374 | A | G | 0.001 | 0.001 | 0.001 |        |        |        |        | Rare SNP   |
| 1 | 1:170677394 | 170677394 | C | T | 0.004 | 0.004 | 0.004 |        |        |        |        | Rare SNP   |
| 1 | 1:170677436 | 170677436 | A | C | 0.001 | 0.001 | 0     |        |        |        |        | Rare SNP   |
| 1 | rs12140571  | 170677498 | C | T | 0.071 | 0.074 | 0.069 | 0.0667 | 1.069  | 0.1836 | 0.7161 | Common SNP |
| 1 | 1:170677689 | 170677689 | A | G | 0.001 | 0     | 0.001 |        |        |        |        | Rare SNP   |

|   |             |           |   |   |       |       |       |        |       |        |        |            |
|---|-------------|-----------|---|---|-------|-------|-------|--------|-------|--------|--------|------------|
| 1 | 1:170677723 | 170677723 | T | C | 0.071 | 0.074 | 0.069 | 0.0667 | 1.069 | 0.1836 | 0.7161 | Common SNP |
| 1 | 1:170677829 | 170677829 | T | C | 0.001 | 0     | 0.001 |        |       |        |        | Rare SNP   |
| 1 | rs55960892  | 170677856 | C | T | 0.002 | 0.002 | 0.002 |        |       |        |        | Rare SNP   |
| 1 | 1:170677891 | 170677891 | G | T | 0.001 | 0     | 0.001 |        |       |        |        | Rare SNP   |
| 1 | 1:170678148 | 170678148 | T | A | 0.008 | 0.009 | 0.006 |        |       |        |        | Rare SNP   |
| 1 | 1:170678192 | 170678192 | G | A | 0.001 | 0.001 | 0     |        |       |        |        | Rare SNP   |
| 1 | 1:170678246 | 170678246 | C | T | 0.001 | 0     | 0.001 |        |       |        |        | Rare SNP   |
| 1 | 1:170678279 | 170678279 | A | C | 0.001 | 0.001 | 0     |        |       |        |        | Rare SNP   |
| 1 | rs77560711  | 170678593 | G | A | 0.002 | 0.001 | 0.002 |        |       |        |        | Rare SNP   |
| 1 | 1:170678684 | 170678684 | G | C | 0.001 | 0     | 0.001 |        |       |        |        | Rare SNP   |
| 1 | 1:170678709 | 170678709 | T | G | 0.001 | 0     | 0.001 |        |       |        |        | Rare SNP   |
| 1 | 1:170678837 | 170678837 | G | T | 0.002 | 0.001 | 0.002 |        |       |        |        | Rare SNP   |
| 1 | 1:170678847 | 170678847 | G | A | 0.001 | 0.001 | 0     |        |       |        |        | Rare SNP   |
| 1 | 1:170678933 | 170678933 | C | T | 0.001 | 0.001 | 0     |        |       |        |        | Rare SNP   |
| 1 | 1:170678980 | 170678980 | T | C | 0.001 | 0     | 0.001 |        |       |        |        | Rare SNP   |
| 1 | 1:170679026 | 170679026 | G | A | 0.001 | 0     | 0.001 |        |       |        |        | Rare SNP   |
| 1 | 1:170679043 | 170679043 | A | G | 0.001 | 0     | 0.001 |        |       |        |        | Rare SNP   |
| 1 | 1:170679056 | 170679056 | G | C | 0.001 | 0     | 0.001 |        |       |        |        | Rare SNP   |
| 1 | 1:170679211 | 170679211 | T | C | 0.001 | 0     | 0.001 |        |       |        |        | Rare SNP   |
| 1 | 1:170679372 | 170679372 | A | G | 0.002 | 0.001 | 0.003 |        |       |        |        | Rare SNP   |
| 1 | 1:170679460 | 170679460 | A | G | 0.001 | 0.001 | 0     |        |       |        |        | Rare SNP   |
| 1 | rs59384810  | 170679474 | G | A | 0.002 | 0.002 | 0.002 |        |       |        |        | Rare SNP   |
| 1 | 1:170679583 | 170679583 | C | T | 0.003 | 0.002 | 0.004 |        |       |        |        | Rare SNP   |
| 1 | 1:170679610 | 170679610 | A | G | 0.001 | 0     | 0.001 |        |       |        |        | Rare SNP   |
| 1 | 1:170679658 | 170679658 | T | C | 0.001 | 0     | 0.001 |        |       |        |        | Rare SNP   |
| 1 | rs78172866  | 170679896 | C | T | 0.002 | 0.002 | 0.001 |        |       |        |        | Rare SNP   |
| 1 | 1:170679917 | 170679917 | A | G | 0.001 | 0.001 | 0     |        |       |        |        | Rare SNP   |
| 1 | 1:170679938 | 170679938 | G | A | 0.006 | 0.004 | 0.009 |        |       |        |        | Rare SNP   |
| 1 | rs10800531  | 170680145 | A | T | 0.492 | 0.498 | 0.483 | 0.0798 | 1.083 | 0.0934 | 0.3932 | Common SNP |
| 1 | 1:170680176 | 170680176 | T | G | 0.001 | 0.001 | 0     |        |       |        |        | Rare SNP   |
| 1 | 1:170680187 | 170680187 | C | T | 0.001 | 0.001 | 0     |        |       |        |        | Rare SNP   |

|   |             |           |   |   |       |       |       |         |        |        |        |  |            |
|---|-------------|-----------|---|---|-------|-------|-------|---------|--------|--------|--------|--|------------|
| 1 | 1:170680279 | 170680279 | T | C | 0.001 | 0     | 0.001 |         |        |        |        |  | Rare SNP   |
| 1 | 1:170680362 | 170680362 | T | C | 0.001 | 0     | 0.001 |         |        |        |        |  | Rare SNP   |
| 1 | 1:170680453 | 170680453 | A | T | 0.001 | 0     | 0.001 |         |        |        |        |  | Rare SNP   |
| 1 | 1:170680460 | 170680460 | C | T | 0.001 | 0.001 | 0     |         |        |        |        |  | Rare SNP   |
| 1 | rs6702337   | 170680677 | T | C | 0.072 | 0.075 | 0.07  | 0.0654  | 1.0676 | 0.1824 | 0.72   |  | Common SNP |
| 1 | rs74123164  | 170680685 | C | G | 0.002 | 0.002 | 0.002 |         |        |        |        |  | Rare SNP   |
| 1 | 1:170680774 | 170680774 | T | G | 0.001 | 0.001 | 0     |         |        |        |        |  | Rare SNP   |
| 1 | 1:170680838 | 170680838 | C | G | 0.001 | 0.001 | 0     |         |        |        |        |  | Rare SNP   |
| 1 | 1:170681037 | 170681037 | G | T | 0.004 | 0.005 | 0.002 |         |        |        |        |  | Rare SNP   |
| 1 | 1:170681042 | 170681042 | C | G | 0.001 | 0     | 0.002 |         |        |        |        |  | Rare SNP   |
| 1 | 1:170681090 | 170681090 | A | C | 0.001 | 0.001 | 0     |         |        |        |        |  | Rare SNP   |
| 1 | rs12085794  | 170681143 | G | A | 0.001 | 0     | 0.002 |         |        |        |        |  | Rare SNP   |
| 1 | 1:170681523 | 170681523 | T | A | 0.001 | 0     | 0.001 |         |        |        |        |  | Rare SNP   |
| 1 | rs75703685  | 170681556 | C | T | 0.001 | 0     | 0.001 |         |        |        |        |  | Rare SNP   |
| 1 | rs12135368  | 170681643 | T | C | 0.018 | 0.013 | 0.023 | -0.5803 | 0.5597 | 0.3684 | 0.1153 |  | Common SNP |
| 1 | rs55689412  | 170681749 | C | T | 0.002 | 0.002 | 0.002 |         |        |        |        |  | Rare SNP   |
| 1 | rs61817386  | 170681971 | C | A | 0.288 | 0.292 | 0.283 | 0.0421  | 1.043  | 0.104  | 0.6855 |  | Common SNP |
| 1 | 1:170681998 | 170681998 | A | G | 0.002 | 0.004 | 0     |         |        |        |        |  | Rare SNP   |
| 1 | 1:170682382 | 170682382 | A | C | 0.001 | 0.001 | 0     |         |        |        |        |  | Rare SNP   |
| 1 | 1:170682396 | 170682396 | G | A | 0.001 | 0     | 0.001 |         |        |        |        |  | Rare SNP   |
| 1 | 1:170683036 | 170683036 | C | T | 0.001 | 0     | 0.001 |         |        |        |        |  | Rare SNP   |
| 1 | 1:170683043 | 170683043 | G | A | 0.001 | 0.001 | 0     |         |        |        |        |  | Rare SNP   |
| 1 | 1:170683068 | 170683068 | G | A | 0.001 | 0.001 | 0.001 |         |        |        |        |  | Rare SNP   |
| 1 | 1:170683092 | 170683092 | C | T | 0.001 | 0     | 0.001 |         |        |        |        |  | Rare SNP   |
| 1 | rs78481350  | 170683175 | C | T | 0.002 | 0.001 | 0.002 |         |        |        |        |  | Rare SNP   |
| 1 | 1:170683446 | 170683446 | T | C | 0.001 | 0     | 0.001 |         |        |        |        |  | Rare SNP   |
| 1 | 1:170683515 | 170683515 | C | A | 0.001 | 0     | 0.001 |         |        |        |        |  | Rare SNP   |
| 1 | 1:170683655 | 170683655 | C | A | 0.001 | 0     | 0.001 |         |        |        |        |  | Rare SNP   |
| 1 | 1:170683826 | 170683826 | G | C | 0.001 | 0.001 | 0     |         |        |        |        |  | Rare SNP   |
| 1 | 1:170683971 | 170683971 | C | G | 0.001 | 0.001 | 0     |         |        |        |        |  | Rare SNP   |
| 1 | 1:170684042 | 170684042 | T | A | 0.001 | 0     | 0.001 |         |        |        |        |  | Rare SNP   |

|   |             |           |   |   |       |       |       |         |        |        |        |  |            |
|---|-------------|-----------|---|---|-------|-------|-------|---------|--------|--------|--------|--|------------|
| 1 | 1:170684070 | 170684070 | G | A | 0.001 | 0.001 | 0     |         |        |        |        |  | Rare SNP   |
| 1 | 1:170684236 | 170684236 | G | C | 0.002 | 0.001 | 0.003 |         |        |        |        |  | Rare SNP   |
| 1 | 1:170684244 | 170684244 | C | T | 0.001 | 0.001 | 0.001 |         |        |        |        |  | Rare SNP   |
| 1 | rs2187895   | 170684431 | G | C | 0.187 | 0.212 | 0.163 | 0.3303  | 1.3914 | 0.1209 | 0.0063 |  | Common SNP |
| 1 | rs76662848  | 170684490 | A | T | 0.043 | 0.038 | 0.047 | -0.2594 | 0.7715 | 0.2373 | 0.2745 |  | Common SNP |
| 1 | rs6679519   | 170685222 | A | G | 0.003 | 0.004 | 0.002 |         |        |        |        |  | Rare SNP   |
| 1 | 1:170685263 | 170685263 | A | G | 0.001 | 0     | 0.001 |         |        |        |        |  | Rare SNP   |
| 1 | rs75655724  | 170686088 | G | A | 0.002 | 0.001 | 0.002 |         |        |        |        |  | Rare SNP   |
| 1 | 1:170686135 | 170686135 | A | C | 0.001 | 0     | 0.002 |         |        |        |        |  | Rare SNP   |
| 1 | 1:170686321 | 170686321 | G | T | 0.001 | 0.001 | 0     |         |        |        |        |  | Rare SNP   |
| 1 | 1:170686575 | 170686575 | A | C | 0.001 | 0.001 | 0.001 |         |        |        |        |  | Rare SNP   |
| 1 | 1:170686578 | 170686578 | C | T | 0.001 | 0     | 0.001 |         |        |        |        |  | Rare SNP   |
| 1 | rs76338702  | 170686615 | A | C | 0.02  | 0.023 | 0.017 | 0.2942  | 1.3421 | 0.3387 | 0.3851 |  | Common SNP |
| 1 | rs59188802  | 170686662 | T | C | 0.289 | 0.294 | 0.283 | 0.0544  | 1.0559 | 0.105  | 0.6046 |  | Common SNP |
| 1 | 1:170686814 | 170686814 | G | T | 0.001 | 0     | 0.001 |         |        |        |        |  | Rare SNP   |
| 1 | 1:170686843 | 170686843 | C | T | 0.001 | 0     | 0.001 |         |        |        |        |  | Rare SNP   |
| 1 | 1:170686904 | 170686904 | G | A | 0.001 | 0.001 | 0     |         |        |        |        |  | Rare SNP   |
| 1 | 1:170686925 | 170686925 | T | C | 0.001 | 0.001 | 0     |         |        |        |        |  | Rare SNP   |
| 1 | 1:170686943 | 170686943 | T | G | 0.001 | 0.001 | 0.001 |         |        |        |        |  | Rare SNP   |
| 1 | 1:170687028 | 170687028 | T | C | 0.001 | 0     | 0.001 |         |        |        |        |  | Rare SNP   |
| 1 | rs78212768  | 170687041 | G | C | 0.002 | 0.002 | 0.002 |         |        |        |        |  | Rare SNP   |
| 1 | 1:170687144 | 170687144 | G | A | 0.001 | 0     | 0.001 |         |        |        |        |  | Rare SNP   |
| 1 | 1:170687157 | 170687157 | G | T | 0.001 | 0     | 0.001 |         |        |        |        |  | Rare SNP   |
| 1 | 1:170687223 | 170687223 | A | T | 0.001 | 0     | 0.001 |         |        |        |        |  | Rare SNP   |
| 1 | 1:170687254 | 170687254 | G | C | 0.001 | 0.001 | 0     |         |        |        |        |  | Rare SNP   |
| 1 | 1:170687313 | 170687313 | G | A | 0.075 | 0.078 | 0.072 | 0.08    | 1.0833 | 0.1799 | 0.6565 |  | Common SNP |
| 1 | 1:170687445 | 170687445 | C | T | 0.001 | 0.001 | 0     |         |        |        |        |  | Rare SNP   |
| 1 | rs77341024  | 170687471 | T | C | 0.002 | 0.001 | 0.002 |         |        |        |        |  | Rare SNP   |
| 1 | rs80294620  | 170687478 | G | C | 0.001 | 0.001 | 0     |         |        |        |        |  | Rare SNP   |
| 1 | 1:170687632 | 170687632 | C | A | 0.001 | 0     | 0.001 |         |        |        |        |  | Rare SNP   |
| 1 | rs12136110  | 170687919 | T | C | 0.077 | 0.08  | 0.074 | 0.0769  | 1.08   | 0.1765 | 0.6629 |  | Common SNP |

|   |             |           |   |   |       |       |       |         |        |        |        |            |
|---|-------------|-----------|---|---|-------|-------|-------|---------|--------|--------|--------|------------|
| 1 | rs736022    | 170688005 | C | T | 0.288 | 0.293 | 0.283 | 0.0489  | 1.0501 | 0.1049 | 0.6413 | Common SNP |
| 1 | 1:170688022 | 170688022 | C | G | 0.001 | 0.001 | 0     |         |        |        |        | Rare SNP   |
| 1 | rs74123165  | 170688025 | C | T | 0.002 | 0.001 | 0.002 |         |        |        |        | Rare SNP   |
| 1 | 1:170688216 | 170688216 | C | T | 0.001 | 0     | 0.001 |         |        |        |        | Rare SNP   |
| 1 | 1:170688241 | 170688241 | A | G | 0.004 | 0.002 | 0.006 |         |        |        |        | Rare SNP   |
| 1 | rs12138799  | 170688306 | G | C | 0.075 | 0.077 | 0.072 | 0.0642  | 1.0663 | 0.1803 | 0.7217 | Common SNP |
| 1 | 1:170688355 | 170688355 | C | T | 0.003 | 0.004 | 0.002 |         |        |        |        | Rare SNP   |
| 1 | rs60542172  | 170688364 | G | A | 0.002 | 0.002 | 0.002 |         |        |        |        | Rare SNP   |
| 1 | 1:170688386 | 170688386 | T | G | 0.001 | 0     | 0.001 |         |        |        |        | Rare SNP   |
| 1 | 1:170688820 | 170688820 | C | T | 0.001 | 0     | 0.001 |         |        |        |        | Rare SNP   |
| 1 | 1:170689354 | 170689354 | G | C | 0.003 | 0.004 | 0.002 |         |        |        |        | Rare SNP   |
| 1 | 1:170689366 | 170689366 | C | A | 0.001 | 0.002 | 0     |         |        |        |        | Rare SNP   |
| 1 | rs75606436  | 170689440 | C | A | 0.002 | 0.001 | 0.002 |         |        |        |        | Rare SNP   |
| 1 | 1:170689572 | 170689572 | A | G | 0.001 | 0.001 | 0     |         |        |        |        | Rare SNP   |
| 1 | 1:170689766 | 170689766 | C | T | 0.001 | 0.001 | 0     |         |        |        |        | Rare SNP   |
| 1 | rs78684576  | 170689807 | A | C | 0.002 | 0.001 | 0.002 |         |        |        |        | Rare SNP   |
| 1 | 1:170689863 | 170689863 | T | A | 0.001 | 0     | 0.001 |         |        |        |        | Rare SNP   |
| 1 | 1:170689906 | 170689906 | A | G | 0.001 | 0     | 0.001 |         |        |        |        | Rare SNP   |
| 1 | 1:170689973 | 170689973 | C | T | 0.001 | 0     | 0.001 |         |        |        |        | Rare SNP   |
| 1 | 1:170690166 | 170690166 | G | T | 0.001 | 0.001 | 0     |         |        |        |        | Rare SNP   |
| 1 | 1:170690275 | 170690275 | G | A | 0.001 | 0.002 | 0     |         |        |        |        | Rare SNP   |
| 1 | 1:170690386 | 170690386 | A | T | 0.001 | 0     | 0.001 |         |        |        |        | Rare SNP   |
| 1 | 1:170690572 | 170690572 | T | C | 0.001 | 0.001 | 0     |         |        |        |        | Rare SNP   |
| 1 | rs2213751   | 170690593 | T | G | 0.144 | 0.126 | 0.162 | -0.2969 | 0.7431 | 0.1353 | 0.0282 | Common SNP |
| 1 | rs12141830  | 170690653 | G | A | 0.075 | 0.077 | 0.072 | 0.0642  | 1.0663 | 0.1803 | 0.7217 | Common SNP |
| 1 | 1:170690661 | 170690661 | G | A | 0.001 | 0.001 | 0.001 |         |        |        |        | Rare SNP   |
| 1 | 1:170690964 | 170690964 | C | T | 0.001 | 0     | 0.001 |         |        |        |        | Rare SNP   |
| 1 | 1:170691002 | 170691002 | G | A | 0.001 | 0.001 | 0     |         |        |        |        | Rare SNP   |
| 1 | rs76839558  | 170691131 | T | G | 0.144 | 0.126 | 0.162 | -0.2969 | 0.7431 | 0.1353 | 0.0282 | Common SNP |
| 1 | rs4656796   | 170691140 | A | T | 0.294 | 0.3   | 0.289 | 0.0544  | 1.0559 | 0.1046 | 0.6031 | Common SNP |
| 1 | 1:170691150 | 170691150 | T | C | 0.001 | 0     | 0.001 |         |        |        |        | Rare SNP   |



|   |             |           |   |   |       |       |       |        |        |        |        |            |
|---|-------------|-----------|---|---|-------|-------|-------|--------|--------|--------|--------|------------|
| 1 | rs76266322  | 170691232 | C | T | 0.001 | 0.001 | 0     |        |        |        |        | Rare SNP   |
| 1 | 1:170691257 | 170691257 | A | G | 0.001 | 0     | 0.001 |        |        |        |        | Rare SNP   |
| 1 | 1:170691481 | 170691481 | A | T | 0.001 | 0     | 0.002 |        |        |        |        | Rare SNP   |
| 1 | 1:170691521 | 170691521 | T | A | 0.002 | 0.001 | 0.002 |        |        |        |        | Rare SNP   |
| 1 | 1:170691654 | 170691654 | T | C | 0.001 | 0.001 | 0.001 |        |        |        |        | Rare SNP   |
| 1 | rs58675363  | 170691864 | A | G | 0.002 | 0.002 | 0.002 |        |        |        |        | Rare SNP   |
| 1 | 1:170691971 | 170691971 | G | A | 0.001 | 0.001 | 0     |        |        |        |        | Rare SNP   |
| 1 | 1:170692058 | 170692058 | C | T | 0.001 | 0.001 | 0     |        |        |        |        | Rare SNP   |
| 1 | rs17551172  | 170692104 | C | T | 0.288 | 0.293 | 0.283 | 0.0489 | 1.0501 | 0.1049 | 0.6413 | Common SNP |
| 1 | 1:170692223 | 170692223 | A | G | 0.001 | 0     | 0.001 |        |        |        |        | Rare SNP   |
| 1 | 1:170692253 | 170692253 | A | T | 0.001 | 0     | 0.001 |        |        |        |        | Rare SNP   |
| 1 | 1:170692448 | 170692448 | T | A | 0.001 | 0     | 0.001 |        |        |        |        | Rare SNP   |
| 1 | 1:170692474 | 170692474 | T | C | 0.001 | 0.001 | 0     |        |        |        |        | Rare SNP   |
| 1 | 1:170692655 | 170692655 | A | G | 0.001 | 0.001 | 0.001 |        |        |        |        | Rare SNP   |
| 1 | rs10919453  | 170692742 | C | G | 0.075 | 0.077 | 0.072 | 0.0642 | 1.0663 | 0.1803 | 0.7217 | Common SNP |
| 1 | 1:170692810 | 170692810 | T | C | 0.001 | 0.001 | 0     |        |        |        |        | Rare SNP   |
| 1 | 1:170692882 | 170692882 | C | G | 0.001 | 0.001 | 0     |        |        |        |        | Rare SNP   |
| 1 | 1:170692929 | 170692929 | G | C | 0.001 | 0.001 | 0     |        |        |        |        | Rare SNP   |
| 1 | 1:170692944 | 170692944 | G | A | 0.001 | 0.002 | 0     |        |        |        |        | Rare SNP   |
| 1 | 1:170692970 | 170692970 | C | G | 0.001 | 0.001 | 0     |        |        |        |        | Rare SNP   |
| 1 | 1:170693015 | 170693015 | G | A | 0.003 | 0.002 | 0.004 |        |        |        |        | Rare SNP   |
| 1 | 1:170693018 | 170693018 | T | A | 0.003 | 0.002 | 0.004 |        |        |        |        | Rare SNP   |
| 1 | 1:170693076 | 170693076 | T | C | 0.001 | 0     | 0.001 |        |        |        |        | Rare SNP   |
| 1 | 1:170693222 | 170693222 | T | C | 0.001 | 0.001 | 0     |        |        |        |        | Rare SNP   |
| 1 | 1:170693251 | 170693251 | C | T | 0.001 | 0.001 | 0     |        |        |        |        | Rare SNP   |
| 1 | 1:170693456 | 170693456 | T | G | 0.001 | 0.001 | 0     |        |        |        |        | Rare SNP   |
| 1 | 1:170693482 | 170693482 | A | G | 0.001 | 0     | 0.001 |        |        |        |        | Rare SNP   |
| 1 | rs12142379  | 170693538 | T | C | 0.075 | 0.077 | 0.072 | 0.0642 | 1.0663 | 0.1803 | 0.7217 | Common SNP |
| 1 | 1:170694475 | 170694475 | G | A | 0.001 | 0.001 | 0     |        |        |        |        | Rare SNP   |
| 1 | 1:170694693 | 170694693 | C | T | 0.001 | 0     | 0.001 |        |        |        |        | Rare SNP   |
| 1 | 1:170694771 | 170694771 | G | T | 0.001 | 0     | 0.001 |        |        |        |        | Rare SNP   |

|   |             |           |   |   |       |       |       |         |        |        |        |  |            |
|---|-------------|-----------|---|---|-------|-------|-------|---------|--------|--------|--------|--|------------|
| 1 | 1:170694937 | 170694937 | A | T | 0.001 | 0.001 | 0     |         |        |        |        |  | Rare SNP   |
| 1 | rs74476977  | 170694946 | G | C | 0.073 | 0.076 | 0.07  | 0.082   | 1.0854 | 0.182  | 0.6524 |  | Common SNP |
| 1 | 1:170695343 | 170695343 | C | T | 0.001 | 0.001 | 0     |         |        |        |        |  | Rare SNP   |
| 1 | 1:170695466 | 170695466 | G | A | 0.001 | 0.001 | 0     |         |        |        |        |  | Rare SNP   |
| 1 | 1:170695472 | 170695472 | C | G | 0.001 | 0     | 0.001 |         |        |        |        |  | Rare SNP   |
| 1 | 1:170695527 | 170695527 | C | G | 0.001 | 0.001 | 0     |         |        |        |        |  | Rare SNP   |
| 1 | rs16863523  | 170695653 | T | G | 0.003 | 0.003 | 0.002 |         |        |        |        |  | Rare SNP   |
| 1 | 1:170695787 | 170695787 | C | T | 0.001 | 0.001 | 0.001 |         |        |        |        |  | Rare SNP   |
| 1 | 1:170695927 | 170695927 | G | A | 0.001 | 0.001 | 0     |         |        |        |        |  | Rare SNP   |
| 1 | rs6701640   | 170696474 | A | C | 0.18  | 0.205 | 0.155 | 0.3367  | 1.4003 | 0.1219 | 0.0057 |  | Common SNP |
| 1 | rs75166316  | 170696504 | G | A | 0.002 | 0.001 | 0.003 |         |        |        |        |  | Rare SNP   |
| 1 | 1:170696515 | 170696515 | C | T | 0.003 | 0.003 | 0.002 |         |        |        |        |  | Rare SNP   |
| 1 | rs16863527  | 170696647 | T | C | 0.001 | 0     | 0.001 |         |        |        |        |  | Rare SNP   |
| 1 | 1:170696813 | 170696813 | T | G | 0.003 | 0     | 0.005 |         |        |        |        |  | Rare SNP   |
| 1 | 1:170696887 | 170696887 | T | C | 0.001 | 0     | 0.001 |         |        |        |        |  | Rare SNP   |
| 1 | 1:170697001 | 170697001 | A | C | 0.001 | 0.001 | 0     |         |        |        |        |  | Rare SNP   |
| 1 | 1:170697037 | 170697037 | A | G | 0.001 | 0     | 0.001 |         |        |        |        |  | Rare SNP   |
| 1 | 1:170697042 | 170697042 | C | G | 0.001 | 0.001 | 0     |         |        |        |        |  | Rare SNP   |
| 1 | 1:170697074 | 170697074 | G | A | 0.005 | 0.005 | 0.004 |         |        |        |        |  | Rare SNP   |
| 1 | 1:170697285 | 170697285 | G | A | 0.005 | 0.004 | 0.006 |         |        |        |        |  | Rare SNP   |
| 1 | 1:170697428 | 170697428 | T | G | 0.001 | 0.001 | 0     |         |        |        |        |  | Rare SNP   |
| 1 | 1:170697497 | 170697497 | A | C | 0.001 | 0.001 | 0.001 |         |        |        |        |  | Rare SNP   |
| 1 | 1:170697596 | 170697596 | A | C | 0.001 | 0     | 0.001 |         |        |        |        |  | Rare SNP   |
| 1 | 1:170697813 | 170697813 | A | C | 0.001 | 0     | 0.001 |         |        |        |        |  | Rare SNP   |
| 1 | rs78232995  | 170697837 | T | C | 0.002 | 0.001 | 0.002 |         |        |        |        |  | Rare SNP   |
| 1 | 1:170697941 | 170697941 | A | G | 0.001 | 0.001 | 0     |         |        |        |        |  | Rare SNP   |
| 1 | rs78712657  | 170698062 | T | C | 0.063 | 0.062 | 0.064 | -0.0295 | 0.9709 | 0.1915 | 0.8774 |  | Common SNP |
| 1 | rs76168575  | 170698172 | G | A | 0.001 | 0     | 0.002 |         |        |        |        |  | Rare SNP   |
| 1 | 1:170698472 | 170698472 | G | A | 0.001 | 0.001 | 0     |         |        |        |        |  | Rare SNP   |
| 1 | 1:170698507 | 170698507 | C | T | 0.001 | 0.001 | 0.001 |         |        |        |        |  | Rare SNP   |
| 1 | 1:170698706 | 170698706 | T | G | 0.001 | 0.002 | 0     |         |        |        |        |  | Rare SNP   |

|   |             |           |   |   |       |       |       |         |        |        |        |  |            |
|---|-------------|-----------|---|---|-------|-------|-------|---------|--------|--------|--------|--|------------|
| 1 | 1:170698776 | 170698776 | G | A | 0.001 | 0     | 0.001 |         |        |        |        |  | Rare SNP   |
| 1 | 1:170699084 | 170699084 | C | T | 0.002 | 0.001 | 0.003 |         |        |        |        |  | Rare SNP   |
| 1 | rs12409048  | 170699149 | G | A | 0.288 | 0.292 | 0.283 | 0.0432  | 1.0442 | 0.1049 | 0.6805 |  | Common SNP |
| 1 | rs3830154   | 170699220 | T | G | 0.001 | 0.001 | 0     |         |        |        |        |  | Rare SNP   |
| 1 | 1:170699346 | 170699346 | G | A | 0.001 | 0     | 0.001 |         |        |        |        |  | Rare SNP   |
| 1 | rs76156084  | 170699377 | C | T | 0.019 | 0.013 | 0.026 | -0.6178 | 0.5391 | 0.3395 | 0.0688 |  | Common SNP |
| 1 | 1:170699437 | 170699437 | T | C | 0.001 | 0     | 0.001 |         |        |        |        |  | Rare SNP   |
| 1 | 1:170699473 | 170699473 | C | T | 0.001 | 0     | 0.001 |         |        |        |        |  | Rare SNP   |
| 1 | 1:170699485 | 170699485 | A | C | 0.001 | 0.001 | 0     |         |        |        |        |  | Rare SNP   |
| 1 | 1:170699644 | 170699644 | A | G | 0.001 | 0     | 0.001 |         |        |        |        |  | Rare SNP   |
| 1 | rs74555079  | 170699657 | G | A | 0.002 | 0.001 | 0.003 |         |        |        |        |  | Rare SNP   |
| 1 | rs76964094  | 170699674 | T | C | 0.074 | 0.076 | 0.072 | 0.0483  | 1.0495 | 0.1808 | 0.7895 |  | Common SNP |
| 1 | 1:170699783 | 170699783 | T | G | 0.001 | 0.001 | 0.001 |         |        |        |        |  | Rare SNP   |
| 1 | 1:170699805 | 170699805 | T | C | 0.006 | 0.009 | 0.004 |         |        |        |        |  | Rare SNP   |
| 1 | 1:170699976 | 170699976 | C | T | 0.001 | 0.001 | 0     |         |        |        |        |  | Rare SNP   |
| 1 | 1:170700003 | 170700003 | G | T | 0.001 | 0     | 0.001 |         |        |        |        |  | Rare SNP   |
| 1 | 1:170700140 | 170700140 | C | T | 0.001 | 0.001 | 0.001 |         |        |        |        |  | Rare SNP   |
| 1 | 1:170700196 | 170700196 | T | C | 0.001 | 0.001 | 0     |         |        |        |        |  | Rare SNP   |
| 1 | 1:170700204 | 170700204 | A | T | 0.001 | 0.001 | 0     |         |        |        |        |  | Rare SNP   |
| 1 | 1:170700342 | 170700342 | A | G | 0.001 | 0     | 0.001 |         |        |        |        |  | Rare SNP   |
| 1 | 1:170700499 | 170700499 | T | C | 0.001 | 0     | 0.001 |         |        |        |        |  | Rare SNP   |
| 1 | 1:170700546 | 170700546 | T | G | 0.001 | 0.001 | 0     |         |        |        |        |  | Rare SNP   |
| 1 | rs1476040   | 170700758 | A | G | 0.254 | 0.278 | 0.231 | 0.265   | 1.3034 | 0.1098 | 0.0158 |  | Common SNP |
| 1 | 1:170701165 | 170701165 | A | T | 0.001 | 0.001 | 0     |         |        |        |        |  | Rare SNP   |
| 1 | rs11589002  | 170701197 | G | T | 0.073 | 0.075 | 0.072 | 0.0322  | 1.0327 | 0.1813 | 0.859  |  | Common SNP |
| 1 | 1:170701224 | 170701224 | G | A | 0.001 | 0.002 | 0     |         |        |        |        |  | Rare SNP   |
| 1 | 1:170701332 | 170701332 | T | C | 0.001 | 0     | 0.001 |         |        |        |        |  | Rare SNP   |
| 1 | rs11587746  | 170701334 | T | C | 0.073 | 0.075 | 0.072 | 0.0322  | 1.0327 | 0.1813 | 0.859  |  | Common SNP |
| 1 | rs17551291  | 170701432 | C | T | 0.305 | 0.308 | 0.302 | 0.0317  | 1.0322 | 0.104  | 0.7608 |  | Common SNP |
| 1 | rs17551298  | 170701453 | G | A | 0.305 | 0.308 | 0.302 | 0.0317  | 1.0322 | 0.104  | 0.7608 |  | Common SNP |
| 1 | 1:170701523 | 170701523 | T | C | 0.001 | 0.001 | 0     |         |        |        |        |  | Rare SNP   |

|   |             |           |   |   |       |       |       |        |        |        |       |  |            |
|---|-------------|-----------|---|---|-------|-------|-------|--------|--------|--------|-------|--|------------|
| 1 | 1:170701686 | 170701686 | C | A | 0.001 | 0.001 | 0     |        |        |        |       |  | Rare SNP   |
| 1 | 1:170701701 | 170701701 | G | A | 0.001 | 0     | 0.001 |        |        |        |       |  | Rare SNP   |
| 1 | 1:170701707 | 170701707 | C | A | 0.001 | 0.001 | 0     |        |        |        |       |  | Rare SNP   |
| 1 | 1:170701736 | 170701736 | G | T | 0.001 | 0.001 | 0     |        |        |        |       |  | Rare SNP   |
| 1 | 1:170701796 | 170701796 | A | G | 0.001 | 0.002 | 0     |        |        |        |       |  | Rare SNP   |
| 1 | 1:170701809 | 170701809 | T | G | 0.001 | 0.001 | 0     |        |        |        |       |  | Rare SNP   |
| 1 | rs12139252  | 170701830 | A | C | 0.073 | 0.075 | 0.072 | 0.0322 | 1.0327 | 0.1813 | 0.859 |  | Common SNP |
| 1 | rs79395499  | 170701842 | T | A | 0.002 | 0.001 | 0.003 |        |        |        |       |  | Rare SNP   |
| 1 | 1:170701913 | 170701913 | T | G | 0.001 | 0.001 | 0.001 |        |        |        |       |  | Rare SNP   |
| 1 | rs74123167  | 170702214 | G | A | 0.002 | 0.001 | 0.002 |        |        |        |       |  | Rare SNP   |
| 1 | 1:170702216 | 170702216 | A | G | 0.001 | 0     | 0.001 |        |        |        |       |  | Rare SNP   |
| 1 | rs76074817  | 170702257 | A | G | 0.073 | 0.075 | 0.072 | 0.0322 | 1.0327 | 0.1813 | 0.859 |  | Common SNP |
| 1 | 1:170702265 | 170702265 | G | A | 0.001 | 0     | 0.001 |        |        |        |       |  | Rare SNP   |
| 1 | 1:170702281 | 170702281 | C | A | 0.001 | 0     | 0.001 |        |        |        |       |  | Rare SNP   |
| 1 | 1:170702428 | 170702428 | G | A | 0.001 | 0     | 0.001 |        |        |        |       |  | Rare SNP   |
| 1 | 1:170702515 | 170702515 | A | G | 0.001 | 0.001 | 0     |        |        |        |       |  | Rare SNP   |
| 1 | 1:170702560 | 170702560 | C | T | 0.001 | 0.001 | 0     |        |        |        |       |  | Rare SNP   |
| 1 | 1:170702644 | 170702644 | A | C | 0.001 | 0     | 0.001 |        |        |        |       |  | Rare SNP   |
| 1 | 1:170702661 | 170702661 | T | A | 0.001 | 0     | 0.001 |        |        |        |       |  | Rare SNP   |
| 1 | 1:170702678 | 170702678 | T | C | 0.001 | 0     | 0.001 |        |        |        |       |  | Rare SNP   |
| 1 | 1:170702768 | 170702768 | C | G | 0.001 | 0     | 0.001 |        |        |        |       |  | Rare SNP   |
| 1 | 1:170703008 | 170703008 | T | C | 0.001 | 0     | 0.001 |        |        |        |       |  | Rare SNP   |
| 1 | 1:170703084 | 170703084 | T | C | 0.001 | 0.001 | 0     |        |        |        |       |  | Rare SNP   |
| 1 | 1:170703663 | 170703663 | C | T | 0.001 | 0.001 | 0     |        |        |        |       |  | Rare SNP   |
| 1 | 1:170703763 | 170703763 | C | T | 0.001 | 0.001 | 0.001 |        |        |        |       |  | Rare SNP   |
| 1 | 1:170703831 | 170703831 | C | T | 0.001 | 0     | 0.001 |        |        |        |       |  | Rare SNP   |
| 1 | 1:170703943 | 170703943 | T | C | 0.001 | 0     | 0.001 |        |        |        |       |  | Rare SNP   |
| 1 | rs11590551  | 170703981 | G | A | 0.073 | 0.075 | 0.072 | 0.0322 | 1.0327 | 0.1813 | 0.859 |  | Common SNP |
| 1 | 1:170704104 | 170704104 | T | C | 0.003 | 0.004 | 0.002 |        |        |        |       |  | Rare SNP   |
| 1 | 1:170704196 | 170704196 | A | G | 0.003 | 0.003 | 0.003 |        |        |        |       |  | Rare SNP   |
| 1 | 1:170704234 | 170704234 | T | C | 0.001 | 0.002 | 0     |        |        |        |       |  | Rare SNP   |

|   |             |           |   |   |       |       |       |         |        |        |        |  |  |            |
|---|-------------|-----------|---|---|-------|-------|-------|---------|--------|--------|--------|--|--|------------|
| 1 | 1:170704279 | 170704279 | T | A | 0.001 | 0.001 | 0     |         |        |        |        |  |  | Rare SNP   |
| 1 | rs35076444  | 170704697 | T | C | 0.001 | 0.001 | 0     |         |        |        |        |  |  | Rare SNP   |
| 1 | 1:170704959 | 170704959 | C | G | 0.001 | 0.001 | 0     |         |        |        |        |  |  | Rare SNP   |
| 1 | rs78621299  | 170704997 | A | G | 0.002 | 0.001 | 0.003 |         |        |        |        |  |  | Rare SNP   |
| 1 | rs74123168  | 170704999 | A | T | 0.002 | 0.002 | 0.002 |         |        |        |        |  |  | Rare SNP   |
| 1 | 1:170705061 | 170705061 | G | C | 0.001 | 0.001 | 0     |         |        |        |        |  |  | Rare SNP   |
| 1 | 1:170705189 | 170705189 | C | A | 0.001 | 0.001 | 0     |         |        |        |        |  |  | Rare SNP   |
| 1 | 1:170705313 | 170705313 | C | T | 0.001 | 0.001 | 0     |         |        |        |        |  |  | Rare SNP   |
| 1 | 1:170705350 | 170705350 | C | T | 0.001 | 0.001 | 0     |         |        |        |        |  |  | Rare SNP   |
| 1 | 1:170705465 | 170705465 | C | T | 0.001 | 0     | 0.001 |         |        |        |        |  |  | Rare SNP   |
| 1 | 1:170705512 | 170705512 | A | C | 0.001 | 0.001 | 0.001 |         |        |        |        |  |  | Rare SNP   |
| 1 | 1:170705754 | 170705754 | C | A | 0.001 | 0.001 | 0     |         |        |        |        |  |  | Rare SNP   |
| 1 | 1:170705813 | 170705813 | G | A | 0.001 | 0.001 | 0.001 |         |        |        |        |  |  | Rare SNP   |
| 1 | 1:170706092 | 170706092 | C | T | 0.001 | 0     | 0.002 |         |        |        |        |  |  | Rare SNP   |
| 1 | rs41272503  | 170706356 | C | G | 0.066 | 0.065 | 0.067 | -0.0291 | 0.9713 | 0.1893 | 0.8778 |  |  | Common SNP |
| 1 | 1:170706447 | 170706447 | T | C | 0.001 | 0     | 0.001 |         |        |        |        |  |  | Rare SNP   |
| 1 | 1:170706606 | 170706606 | T | A | 0.001 | 0     | 0.001 |         |        |        |        |  |  | Rare SNP   |
| 1 | rs73036701  | 170706639 | G | A | 0.002 | 0.002 | 0.002 |         |        |        |        |  |  | Rare SNP   |
| 1 | 1:170706994 | 170706994 | A | G | 0.001 | 0.001 | 0     |         |        |        |        |  |  | Rare SNP   |
| 1 | rs74123171  | 170707243 | T | A | 0.002 | 0.002 | 0.001 |         |        |        |        |  |  | Rare SNP   |
| 1 | 1:170707292 | 170707292 | T | C | 0.001 | 0     | 0.001 |         |        |        |        |  |  | Rare SNP   |
| 1 | 1:170707387 | 170707387 | T | C | 0.001 | 0     | 0.001 |         |        |        |        |  |  | Rare SNP   |
| 1 | 1:170707477 | 170707477 | C | G | 0.002 | 0.001 | 0.003 |         |        |        |        |  |  | Rare SNP   |
| 1 | 1:170707481 | 170707481 | T | C | 0.001 | 0.001 | 0     |         |        |        |        |  |  | Rare SNP   |
| 1 | rs41272505  | 170707509 | A | G | 0.031 | 0.035 | 0.028 | 0.2189  | 1.2447 | 0.273  | 0.4226 |  |  | Common SNP |
| 1 | 1:170707590 | 170707590 | T | C | 0.001 | 0.001 | 0     |         |        |        |        |  |  | Rare SNP   |
| 1 | 1:170707617 | 170707617 | C | T | 0.001 | 0.001 | 0     |         |        |        |        |  |  | Rare SNP   |
| 1 | rs3820416   | 170707675 | T | C | 0.306 | 0.311 | 0.302 | 0.0425  | 1.0434 | 0.1038 | 0.6823 |  |  | Common SNP |
| 1 | 1:170708005 | 170708005 | A | C | 0.001 | 0     | 0.001 |         |        |        |        |  |  | Rare SNP   |
| 1 | 1:170708021 | 170708021 | T | C | 0.001 | 0     | 0.001 |         |        |        |        |  |  | Rare SNP   |
| 1 | 1:170708066 | 170708066 | G | A | 0.001 | 0     | 0.001 |         |        |        |        |  |  | Rare SNP   |

|   |             |           |   |   |       |       |       |        |        |        |        |  |            |
|---|-------------|-----------|---|---|-------|-------|-------|--------|--------|--------|--------|--|------------|
| 1 | 1:170708181 | 170708181 | T | C | 0.001 | 0.001 | 0     |        |        |        |        |  | Rare SNP   |
| 1 | 1:170708203 | 170708203 | G | A | 0.001 | 0.001 | 0     |        |        |        |        |  | Rare SNP   |
| 1 | 1:170708338 | 170708338 | A | T | 0.001 | 0.001 | 0.001 |        |        |        |        |  | Rare SNP   |
| 1 | 1:170708346 | 170708346 | C | T | 0.002 | 0.002 | 0.001 |        |        |        |        |  | Rare SNP   |
| 1 | 1:170708423 | 170708423 | A | G | 0.001 | 0     | 0.001 |        |        |        |        |  | Rare SNP   |
| 1 | 1:170708597 | 170708597 | A | C | 0.001 | 0     | 0.001 |        |        |        |        |  | Rare SNP   |
| 1 | rs4656797   | 170708637 | C | G | 0.18  | 0.206 | 0.154 | 0.3512 | 1.4208 | 0.122  | 0.004  |  | Common SNP |
| 1 | rs41272507  | 170708668 | T | G | 0.046 | 0.052 | 0.04  | 0.2606 | 1.2977 | 0.2145 | 0.2244 |  | Common SNP |
| 1 | 1:170708744 | 170708744 | G | T | 0.001 | 0     | 0.001 |        |        |        |        |  | Rare SNP   |
| 1 | 1:170708877 | 170708877 | A | G | 0.001 | 0.001 | 0     |        |        |        |        |  | Rare SNP   |
| 1 | 1:170708882 | 170708882 | T | C | 0.001 | 0     | 0.001 |        |        |        |        |  | Rare SNP   |
| 1 | 1:170708937 | 170708937 | T | C | 0.001 | 0     | 0.001 |        |        |        |        |  | Rare SNP   |
| 1 | 1:170708939 | 170708939 | T | G | 0.001 | 0.001 | 0     |        |        |        |        |  | Rare SNP   |
| 1 | rs11589091  | 170708980 | T | C | 0.074 | 0.076 | 0.072 | 0.0484 | 1.0496 | 0.1808 | 0.7888 |  | Common SNP |
| 1 | 1:170709085 | 170709085 | G | A | 0.001 | 0.001 | 0     |        |        |        |        |  | Rare SNP   |
| 1 | 1:170709126 | 170709126 | G | A | 0.001 | 0.001 | 0     |        |        |        |        |  | Rare SNP   |
| 1 | rs4656799   | 170709195 | C | T | 0.375 | 0.381 | 0.37  | 0.0483 | 1.0495 | 0.0981 | 0.6221 |  | Common SNP |
| 1 | rs6665663   | 170709245 | T | G | 0.002 | 0.001 | 0.002 |        |        |        |        |  | Rare SNP   |
| 1 | 1:170709257 | 170709257 | G | C | 0.001 | 0.001 | 0     |        |        |        |        |  | Rare SNP   |
| 1 | 1:170709274 | 170709274 | A | C | 0.001 | 0     | 0.001 |        |        |        |        |  | Rare SNP   |
| 1 | rs16863548  | 170709358 | T | C | 0.002 | 0.002 | 0.002 |        |        |        |        |  | Rare SNP   |
| 1 | 1:170709411 | 170709411 | G | A | 0.001 | 0.001 | 0.001 |        |        |        |        |  | Rare SNP   |
| 1 | 1:170709497 | 170709497 | A | G | 0.002 | 0.001 | 0.003 |        |        |        |        |  | Rare SNP   |
| 1 | 1:170709503 | 170709503 | G | A | 0.001 | 0.001 | 0     |        |        |        |        |  | Rare SNP   |
| 1 | 1:170709512 | 170709512 | C | T | 0.001 | 0.001 | 0     |        |        |        |        |  | Rare SNP   |
| 1 | 1:170709551 | 170709551 | A | G | 0.008 | 0.006 | 0.01  |        |        |        |        |  | Rare SNP   |
| 1 | 1:170709571 | 170709571 | A | G | 0.001 | 0.001 | 0.001 |        |        |        |        |  | Rare SNP   |
| 1 | 1:170709620 | 170709620 | A | C | 0.002 | 0.001 | 0.003 |        |        |        |        |  | Rare SNP   |
| 1 | rs10919454  | 170709635 | G | A | 0.286 | 0.306 | 0.266 | 0.217  | 1.2423 | 0.11   | 0.0486 |  | Common SNP |
| 1 | 1:170709642 | 170709642 | C | T | 0.001 | 0.002 | 0     |        |        |        |        |  | Rare SNP   |
| 1 | rs74123172  | 170709893 | G | A | 0.002 | 0.002 | 0.002 |        |        |        |        |  | Rare SNP   |

|   |             |           |   |   |       |       |       |         |        |        |        |  |  |            |
|---|-------------|-----------|---|---|-------|-------|-------|---------|--------|--------|--------|--|--|------------|
| 1 | 1:170710078 | 170710078 | G | A | 0.001 | 0     | 0.001 |         |        |        |        |  |  | Rare SNP   |
| 1 | 1:170710117 | 170710117 | T | C | 0.001 | 0     | 0.001 |         |        |        |        |  |  | Rare SNP   |
| 1 | rs16863554  | 170710119 | T | G | 0.003 | 0.003 | 0.002 |         |        |        |        |  |  | Rare SNP   |
| 1 | 1:170710130 | 170710130 | T | C | 0.001 | 0.001 | 0.001 |         |        |        |        |  |  | Rare SNP   |
| 1 | 1:170710247 | 170710247 | T | G | 0.001 | 0     | 0.001 |         |        |        |        |  |  | Rare SNP   |
| 1 | 1:170710413 | 170710413 | A | G | 0.005 | 0.005 | 0.005 |         |        |        |        |  |  | Rare SNP   |
| 1 | 1:170710414 | 170710414 | T | A | 0.001 | 0     | 0.001 |         |        |        |        |  |  | Rare SNP   |
| 1 | 1:170710453 | 170710453 | T | C | 0.001 | 0.001 | 0     |         |        |        |        |  |  | Rare SNP   |
| 1 | 1:170710522 | 170710522 | T | C | 0.001 | 0.001 | 0     |         |        |        |        |  |  | Rare SNP   |
| 1 | 1:170710537 | 170710537 | C | T | 0.001 | 0     | 0.001 |         |        |        |        |  |  | Rare SNP   |
| 1 | 1:170710596 | 170710596 | G | A | 0.001 | 0     | 0.001 |         |        |        |        |  |  | Rare SNP   |
| 1 | rs76239666  | 170710609 | G | A | 0.007 | 0.006 | 0.008 |         |        |        |        |  |  | Rare SNP   |
| 1 | 1:170710653 | 170710653 | T | C | 0.001 | 0.001 | 0     |         |        |        |        |  |  | Rare SNP   |
| 1 | 1:170710674 | 170710674 | A | C | 0.003 | 0.005 | 0     |         |        |        |        |  |  | Rare SNP   |
| 1 | rs10489232  | 170710683 | G | T | 0.129 | 0.117 | 0.141 | -0.2198 | 0.8027 | 0.1402 | 0.1168 |  |  | Common SNP |
| 1 | 1:170710728 | 170710728 | C | T | 0.001 | 0     | 0.001 |         |        |        |        |  |  | Rare SNP   |
| 1 | 1:170710783 | 170710783 | G | C | 0.001 | 0.001 | 0     |         |        |        |        |  |  | Rare SNP   |
| 1 | 1:170710929 | 170710929 | C | T | 0.001 | 0     | 0.001 |         |        |        |        |  |  | Rare SNP   |
| 1 | 1:170711007 | 170711007 | A | C | 0.001 | 0     | 0.001 |         |        |        |        |  |  | Rare SNP   |
| 1 | 1:170711040 | 170711040 | C | T | 0.001 | 0.001 | 0     |         |        |        |        |  |  | Rare SNP   |
| 1 | 1:170711089 | 170711089 | C | T | 0.007 | 0.008 | 0.006 |         |        |        |        |  |  | Rare SNP   |
| 1 | rs11811206  | 170711092 | T | C | 0.074 | 0.077 | 0.071 | 0.0828  | 1.0863 | 0.1808 | 0.6469 |  |  | Common SNP |
| 1 | 1:170711162 | 170711162 | G | A | 0.003 | 0.003 | 0.002 |         |        |        |        |  |  | Rare SNP   |
| 1 | 1:170711266 | 170711266 | A | G | 0.001 | 0.001 | 0.001 |         |        |        |        |  |  | Rare SNP   |
| 1 | 1:170711490 | 170711490 | G | A | 0.007 | 0.006 | 0.008 |         |        |        |        |  |  | Rare SNP   |
| 1 | 1:170711543 | 170711543 | C | T | 0.001 | 0.001 | 0     |         |        |        |        |  |  | Rare SNP   |
| 1 | 1:170711550 | 170711550 | T | G | 0.001 | 0     | 0.001 |         |        |        |        |  |  | Rare SNP   |
| 1 | 1:170711579 | 170711579 | C | A | 0.001 | 0     | 0.001 |         |        |        |        |  |  | Rare SNP   |
| 1 | 1:170711634 | 170711634 | C | T | 0.001 | 0     | 0.001 |         |        |        |        |  |  | Rare SNP   |
| 1 | 1:170711705 | 170711705 | T | C | 0.001 | 0     | 0.001 |         |        |        |        |  |  | Rare SNP   |
| 1 | 1:170711747 | 170711747 | T | C | 0.001 | 0.001 | 0.001 |         |        |        |        |  |  | Rare SNP   |

|   |             |           |   |   |       |       |       |        |        |        |        |  |            |
|---|-------------|-----------|---|---|-------|-------|-------|--------|--------|--------|--------|--|------------|
| 1 | 1:170711794 | 170711794 | C | T | 0.001 | 0     | 0.001 |        |        |        |        |  | Rare SNP   |
| 1 | 1:170711809 | 170711809 | C | T | 0.001 | 0     | 0.001 |        |        |        |        |  | Rare SNP   |
| 1 | 1:170711838 | 170711838 | T | A | 0.001 | 0.001 | 0     |        |        |        |        |  | Rare SNP   |
| 1 | 1:170711958 | 170711958 | A | G | 0.001 | 0.001 | 0.001 |        |        |        |        |  | Rare SNP   |
| 1 | 1:170712030 | 170712030 | G | A | 0.001 | 0.001 | 0     |        |        |        |        |  | Rare SNP   |
| 1 | 1:170712078 | 170712078 | C | G | 0.001 | 0.001 | 0     |        |        |        |        |  | Rare SNP   |
| 1 | 1:170712360 | 170712360 | G | T | 0.001 | 0     | 0.001 |        |        |        |        |  | Rare SNP   |
| 1 | rs2421492   | 170712490 | A | G | 0.426 | 0.458 | 0.393 | 0.2732 | 1.3142 | 0.0962 | 0.0045 |  | Common SNP |
| 1 | 1:170712535 | 170712535 | T | A | 0.001 | 0     | 0.001 |        |        |        |        |  | Rare SNP   |
| 1 | 1:170712578 | 170712578 | T | A | 0.001 | 0.001 | 0     |        |        |        |        |  | Rare SNP   |

Abbreviations: Chr=chromosome number, REF=referent allele, ALT=alternate allele, MAF=Minor allele frequency, OR=Odds ratio, SE=Standard error



**Supplementary Table S3: List of Potentially Deleterious Variants in *PRRX1***

| <b>Position</b> | <b>Amino acid change</b> | <b>MAF in AF cases</b> | <b>MAF in referents</b> | <b>Conservation score</b> | <b>Polyphen score</b> | <b>dbSNP ID</b> | <b>Frequency in EVS</b> |
|-----------------|--------------------------|------------------------|-------------------------|---------------------------|-----------------------|-----------------|-------------------------|
| 170633544       | R62Q                     | 0                      | 0.0043                  | 4.951                     | 0.986                 | rs74674242      | 0.013                   |
| 170695466       | V175M                    | 0.0022                 | 0                       | 3.654                     | 0.99                  | rs201365132     | 3.08E-04                |
| 170695472       | Q177E                    | 0                      | 0.0022                  | 5.292                     | 0.713                 | -               | -                       |
| 170695527       | T195R                    | 0.0022                 | 0                       | 3.377                     | 0.622                 | -               | -                       |
| 170699437       | C207R                    | 0                      | 0.0022                  | 2.913                     | na                    | -               | -                       |
| 170705313       | P242S                    | 0.0022                 | 0                       | 4.02                      | 0.006                 | rs201359953     | 7.70E-05                |

Abbreviation: EVS, exome variant server; MAF, minor allele frequency

**Supplementary Table S4: Regions analyzed for enhancer activity**

| Region Name | Genomic coordinates (hg19)      |
|-------------|---------------------------------|
| E           | <b>Chr1:170586854-170590138</b> |
| F           | <b>Chr1:170609564-170610260</b> |
| G           | <b>Chr1:170591448-170593386</b> |
| H           | <b>Chr1:170602464-170605074</b> |
| I           | <b>Chr1:170633741-170635800</b> |
| J           | <b>Chr1:170635472-170640974</b> |
| K           | <b>Chr1:170641154-170642626</b> |
| Pr          | <b>Chr1:170630677-170633741</b> |

**Supplementary Table S5: Predicted altered transcription factor binding sites by JASPAR**

**Possible Enhancers**

| Gene name | Ensembl ID (Human) | Minor allele PWM score | Major allele PWM score(*) |
|-----------|--------------------|------------------------|---------------------------|
| TEAD1     | ENSG00000197905    | 12.41                  | 10.85                     |
| TEAD4     | ENSG00000187079    | 12.28                  | 10.97                     |
| Twist2    | ENSG00000233608    | 11.22                  |                           |
| NFATC1    | ENSG00000131196    | 8.46                   | 7.59                      |
| NFATC3    | ENSG00000072736    | 7.59                   | 7.94                      |
| CLOCK     | ENSG00000134852    | 7.87                   |                           |
| Myc       | ENSG00000136997    | 7.60                   |                           |
| Npas2     | ENSG00000170485    | 7.27                   |                           |
| HLTF      | ENSG00000071794    | 7.08                   |                           |
| ID4       | ENSG00000172201    | 7.06                   |                           |
| Bhlha15   | ENSG00000180535    | 6.92                   |                           |
| Creb3l2   | ENSG00000182158    | 6.81                   |                           |
| Arnt      | ENSG00000143437    | 6.11                   |                           |
| Neurog1   | ENSG00000181965    | 6.11                   | 4.32                      |
| MNT       | ENSG00000070444    | 6.01                   |                           |
| Mlxip     | ENSG00000175727    | 5.85                   |                           |
| NEUROD2   | ENSG00000171532    | 5.83                   | 3.59                      |
| TBX4      | ENSG00000121075    | 5.75                   |                           |
| MAX       | ENSG00000125952    | 5.64                   |                           |
| FIGLA     | ENSG00000183733    | 5.49                   |                           |
| TBX5      | ENSG00000089225    | 5.29                   |                           |
| Hes1      | ENSG00000114315    | 5.16                   |                           |
| Id2       | ENSG00000115738    | 5.08                   |                           |
| Mycn      | ENSG00000134323    | 5.02                   |                           |
| TCF4      | ENSG00000196628    | 4.89                   |                           |
| TBX1      | ENSG00000184058    | 4.78                   |                           |
| TBR1      | ENSG00000136535    | 4.76                   |                           |
| MGA       | ENSG00000174197    | 4.75                   |                           |
| JDP2      | ENSG00000140044    | 4.37                   |                           |
| TCF3      | ENSG00000071564    | 3.91                   |                           |
| HLF       | ENSG00000108924    | 3.84                   | 3.21                      |

**Possible Repressors**

| Gene name | Ensembl ID      | Major allele PWM score |
|-----------|-----------------|------------------------|
| SOX10     | ENSG00000100146 | 5.28                   |
| ELF5      | ENSG00000135374 | 5.40                   |
| Ahr::Arnt | ENSG00000106546 | 5.75                   |

|                |                                      |      |  |
|----------------|--------------------------------------|------|--|
| SNAI2          | ENSG00000019549                      | 3.46 |  |
| Stat5a::Stat5b | ENSG000000126561<br>ENSG000000173757 | 3.37 |  |

**Supplementary Figure S1: Principal components analysis of previously genotyped study samples.**

Ancestry analysis of previously genotyped cases and controls demonstrating European ancestry of study samples. A subset of studied samples were previously genotyped either by Affymetrix SNP 550k array or Affymetrix SNP 6.0 array. The genotypes were then imputed to the 1000 Genomes Project panel to generate a common genotype set. We then performed clumping analysis and selected 45921 common (MAF $\geq$ 0.05) independent variants, which were combined with the 1000 Genomes Reference Panel. PLINK was used to perform the principal components analysis. The Figure S1 plot shows the first two principle components. Samples from three ancestries in 1000 Genomes Project were shown: European (EUR), Asian (ASN) and African (AFR). "Controls" represent control samples in the current study, and "Cases" represent case samples in the current study.

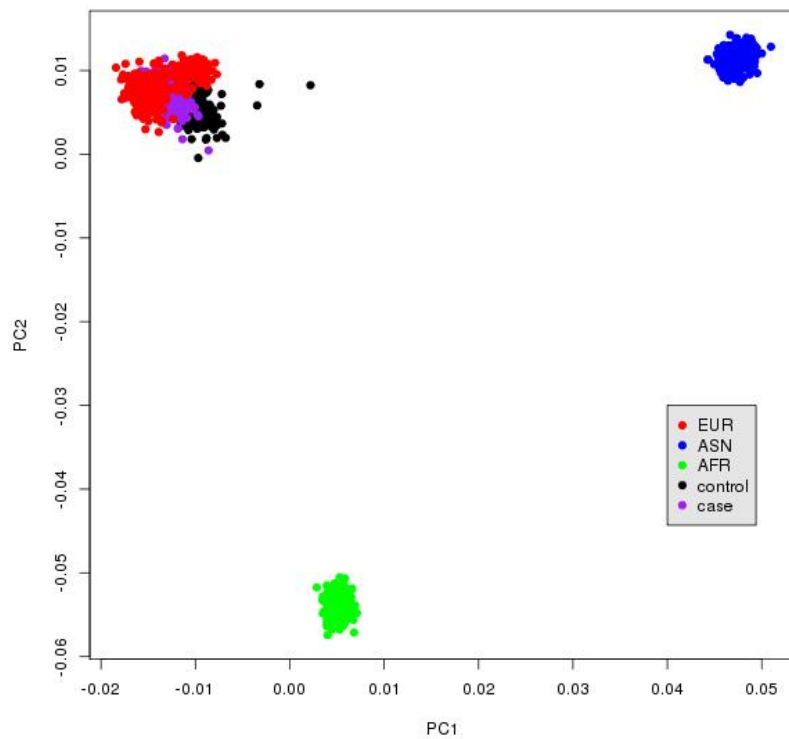

**Supplementary Figure S2: *prrx1* knockdown in zebrafish embryos.** A. in situ hybridization demonstrating localization of *prrx1a* and *prrx1b* mRNA in 72 hour post fertilization zebrafish embryos. Arrows indicate the cardiac region. B. Morpholino sequences for *prrx1a* and *prrx1b* with target region and effective dose per embryo. C. Percent knockdown of *prrx1a* and *prrx1b* paralogues for each morpholino as calculated by semi-Q PCR. Error bars represent the SEM. D. Representative images of gross morphology seen at 72 hpf after microinjection with respective morpholinos. Scale bar represents 1mm. E. Representative gel images of PCR amplifications following injection of each morpholino. F. Resting heart rate and ventricular fraction shortening in 72 hpf zebrafish hearts. Numbers within bars represent n. Error bars in all panels represent the SEM. G. Atrial action potential durations measured from 72 hpf zebrafish with diminishing doses of morpholino. Numbers within bars indicate the number of biological replicates. Numbers below x-axis indicate the concentration of morpholino injected. 0.2 (*prrx1a* (1)) and 0.1 (*prrx1a* (2)) were doses used in Figure 4 of the main manuscript.

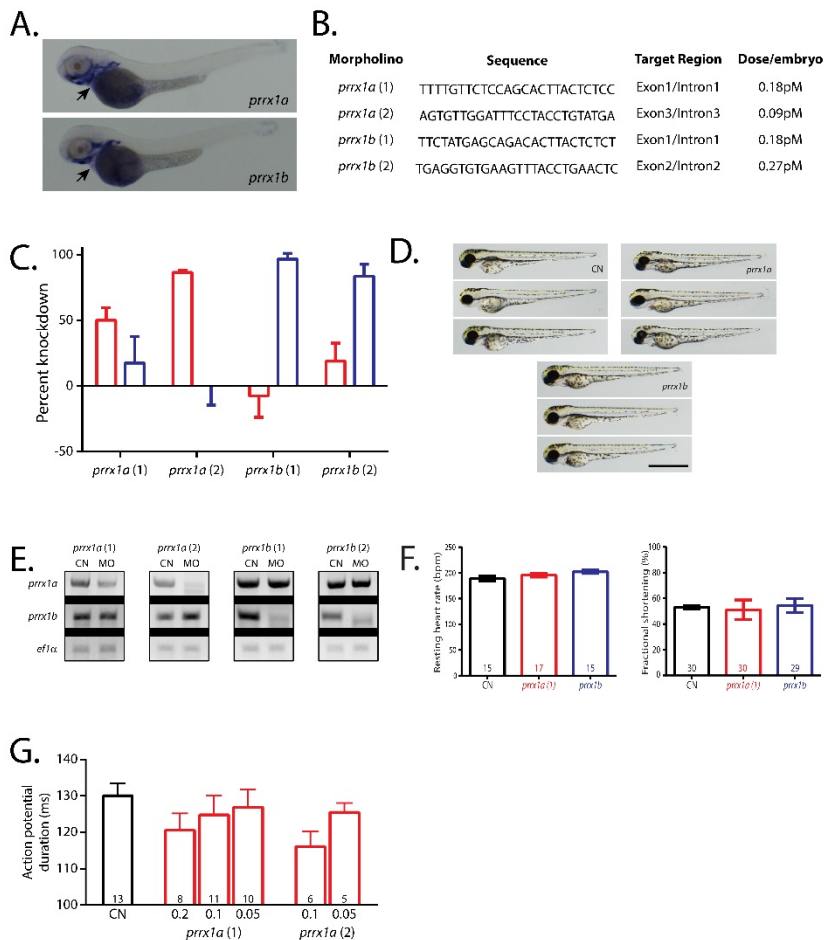

**Supplementary Figure S3: DNaseI hypersensitivity in hESC, HCM and HCF around the enhancer regions E and F.** ENCODE UCSC Browser tracks showing DNaseI hypersensitivity in human embryonic stem cells (hESC), human cardiac fibroblasts (HCF) and human cardiac myocytes (HCM) in the area of E and F enhancer regions (depicted on the lower panel). 237bp region containing functional SNP for AF (labeled rs577676(237bp)) is shown according to its position on the E enhancer.

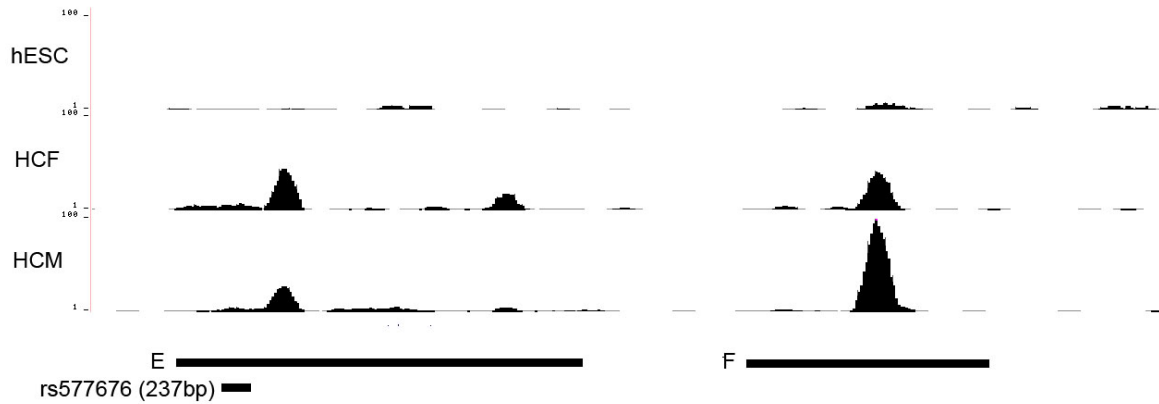

**Supplementary Figure S4: Hi-C derived directionality ratios and virtual 3C. A.** Directionality index showing the degree of upstream and downstream interaction bias within chr1:169600000-171200000 region. Two distinct topologically associated domains in human embryonic stem cell line (hESC) and single topologically associated domain in fibroblast cell line (IMR90) are labeled as TAD. **B.** A region inside a topologically associated domain (labeled TAD2) containing *PRRX1* gene in human embryonic stem cells (hESC) was used as a reference point. Solid green and blue lines represent relative contact frequency of this domain with other sections of the region in human embryonic stem cell line (hESC) and fibroblasts (IMR90) respectively. Dotted green and blue lines outline interaction frequencies of the domain containing *PRRX1* (TAD2) and domain containing E and F enhancer region (TAD1), and show that the difference in relative contact probability is about 50%. Reference region was set to the bin 170720-170760, approximately in the center of TAD 2. Analysis was performed at 40kb resolution. Relative contact probability is a frequency of interaction between two regions ("observed"), divided by an average interaction frequency between pairs of regions separated by that distance ("expected"). **C.** The 20-kb region containing E and F enhancer region was used as a reference (gray shaded area, 170580-170600 kb). Solid green and blue lines represent relative contact frequency of the E and F enhancer region with nearby genomic locations in human embryonic stem cell line (hESC) and fibroblasts (IMR90) respectively. *PRRX1* promoter and gene are labeled with an arrow. Each point represents contact frequency of a 10-kb bin; e.g. point placed at 170605kb would represent contact frequency of the region 170600-170610 with the reference region. Relative contact probability is a frequency of interaction between two regions ("observed"), divided by an average interaction frequency between pairs of regions separated by that distance ("expected").



# PRRX1 and Atrial Fibrillation

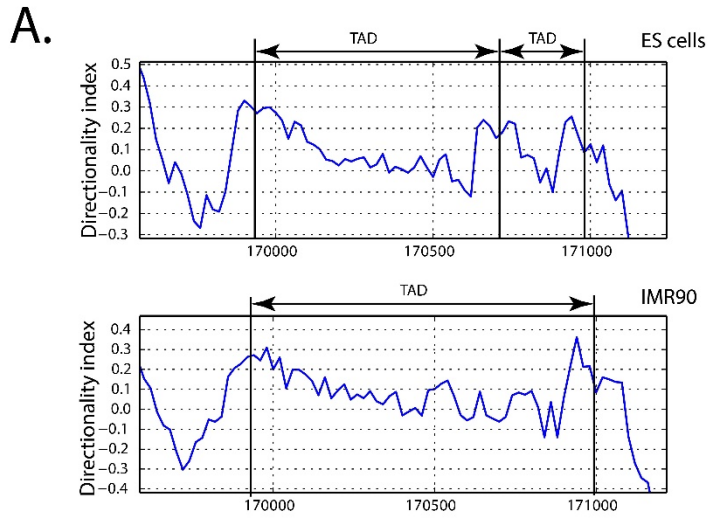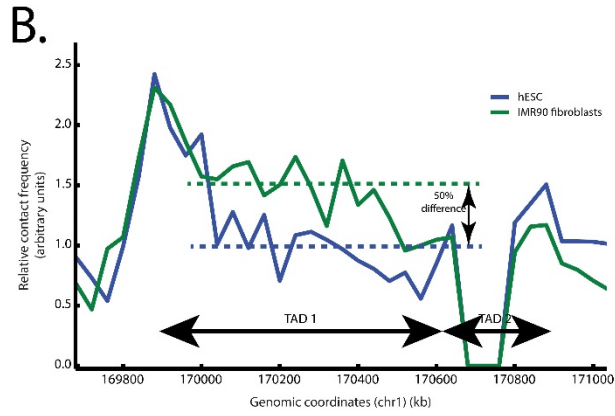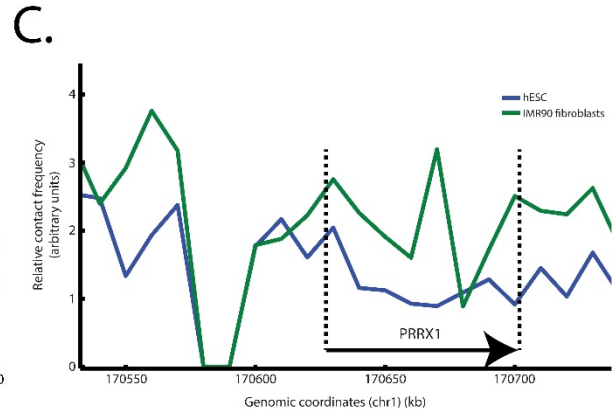

**Supplementary Figure S5: Screening for a functional SNP within *PRRX1* promoter region.**

Luciferase assay results showing the effect of genotype on enhancer activity. Assayed regions of the *PRRX1* promoter region, ranging from 100-300bp in length and containing a single SNP, are labeled by rsID and respective base composition.

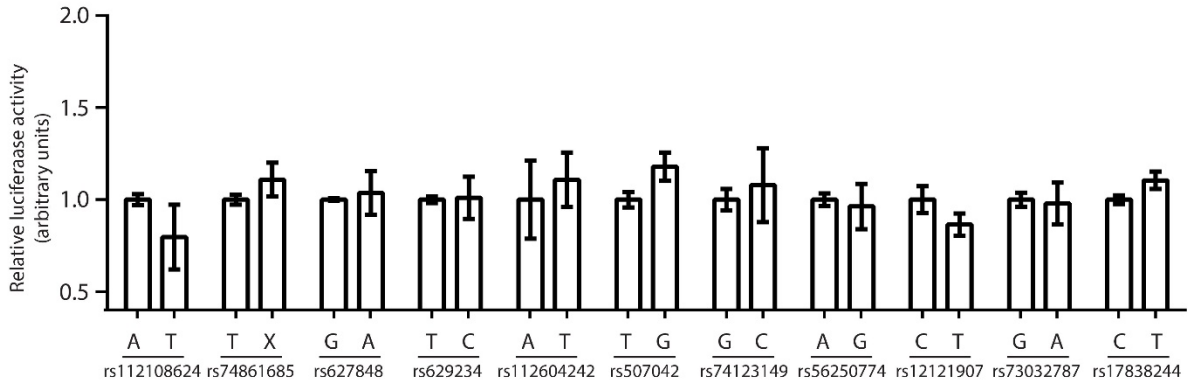

**Supplementary Figure S6: Analysis of the effect of rs577676 on the enhancer function via serial deletions.**

**A.** Schematic showing the deletions tested within the 140bp enhancer region in respect to rs577676. **B.** The representative zebrafish for the enhancer activity screen displaying the tissue distribution and intensity of the enhancer activity. Scale bar represents 1mm. **C.** qRT-PCR results measuring relative EGFP expression levels in zebrafish enhancer screen. \* represents  $p < 0.05$  when compared to the full length construct.

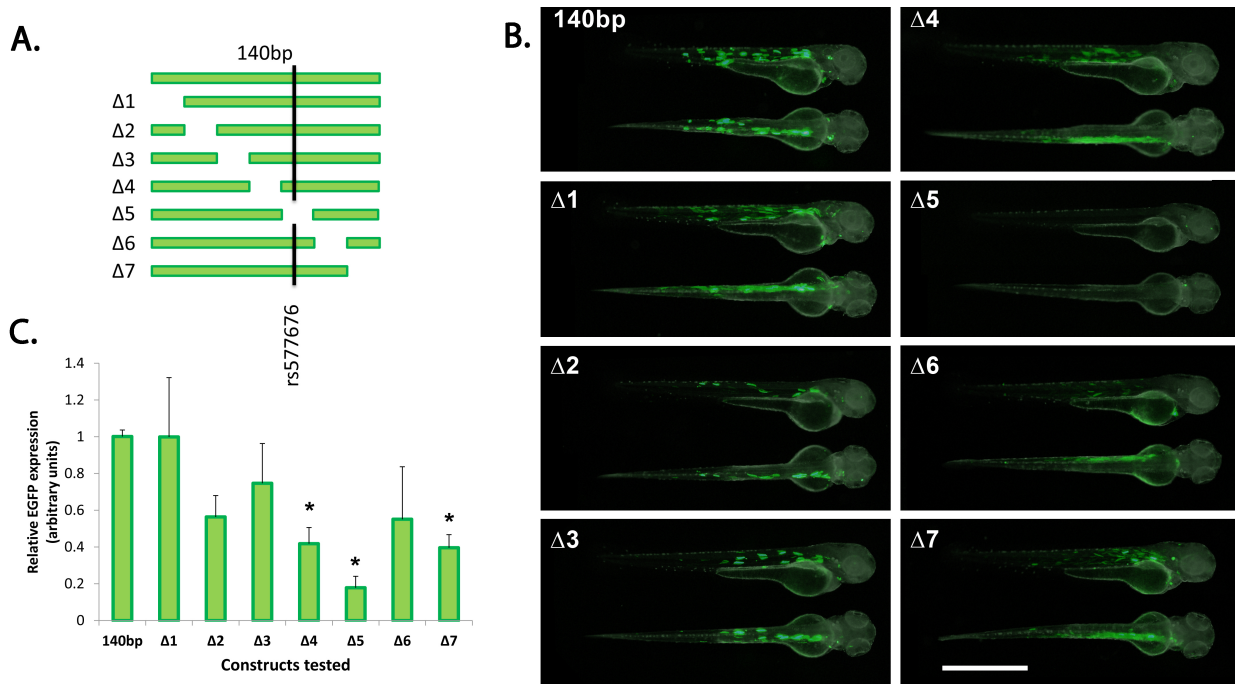

Supplement: NIHMS903575-supplement-001902_-_Supplemental_Material.pdf [file NIHMS903575-supplement-001902_-_Supplemental_Material.pdf]
